# Supplementary material for: RNA sequencing identifies transcriptional changes in the rabbit larynx in response to low humidity challenge
Source: BMC Genomics. 2020 Dec 11;21:888. doi: 10.1186/s12864-020-07301-7 (PMC7733274; doi:10.1186/s12864-020-07301-7)
Supplement: Supplementary file 2 — Additional file 2: Table S2. Functional enrichment analyses of differentially expressed genes identified in the larynges of low humidity exposure group. Excel table containing the functional annotation enrichments divided into GO categories and KEGG obtained with DAVID (first tab), the functional annotation enrichments obtained by STRING (second tab), and the enrichement data for moderate and low humidity groups by GSEA. [file 12864_2020_7301_MOESM2_ESM.xlsx]

## Sheet: DAVID
Category	Term	Count	%	PValue	Genes	List Total	Pop Hits	Pop Total	Fold Enrichment	Bonferroni	Benjamini	FDR
GOTERM_BP_DIRECT	GO:0055010~ventricular cardiac muscle tissue morphogenesis	5	5.81395	6.15751e-07	ENSOCUG00000007983, ENSOCUG00000010424, ENSOCUG00000011037, ENSOCUG00000025586, ENSOCUG00000012392	49	15	9991	67.966	0.000126221	0.000125613	0.000125613
GOTERM_BP_DIRECT	GO:0060048~cardiac muscle contraction	5	5.81395	1.36583e-06	ENSOCUG00000007983, ENSOCUG00000011037, ENSOCUG00000010829, ENSOCUG00000025586, ENSOCUG00000012392	49	18	9991	56.6383	0.000279956	0.000139315	0.000139315
GOTERM_BP_DIRECT	GO:0002026~regulation of the force of heart contraction	4	4.65116	8.56768e-06	ENSOCUG00000011037, ENSOCUG00000010829, ENSOCUG00000025586, ENSOCUG00000012392	49	9	9991	90.6213	0.00175484	0.000582602	0.000582602
GOTERM_BP_DIRECT	GO:0014883~transition between fast and slow fiber	3	3.48837	0.000334901	ENSOCUG00000007983, ENSOCUG00000010424, ENSOCUG00000011037	49	6	9991	101.949	0.0663618	0.01708	0.01708
GOTERM_BP_DIRECT	GO:0050832~defense response to fungus	2	2.32558	0.0516214	ENSOCUG00000003229, ENSOCUG00000022646	49	11	9991	37.0724	0.999981	1	1
GOTERM_CC_DIRECT	GO:0031672~A band	3	3.48837	0.000916126	ENSOCUG00000010829, ENSOCUG00000025586, ENSOCUG00000012392	74	8	12532	63.5068	0.0526401	0.0540514	0.0540514
GOTERM_CC_DIRECT	GO:0005576~extracellular region	8	9.30233	0.00221374	ENSOCUG00000011546, ENSOCUG00000005396, ENSOCUG00000009486, ENSOCUG00000016426, ENSOCUG00000022646, ENSOCUG00000010912, ENSOCUG00000012626, ENSOCUG00000009529	74	312	12532	4.34234	0.122567	0.0653052	0.0653052
GOTERM_CC_DIRECT	GO:0031090~organelle membrane	3	3.48837	0.0281988	ENSOCUG00000022951, ENSOCUG00000006796, ENSOCUG00000023380	74	45	12532	11.2901	0.815044	0.406537	0.406537
GOTERM_CC_DIRECT	GO:0005615~extracellular space	9	10.4651	0.0315999	ENSOCUG00000029278, ENSOCUG00000009244, ENSOCUG00000014485, ENSOCUG00000006860, ENSOCUG00000027203, ENSOCUG00000005091, ENSOCUG00000008818, ENSOCUG00000003229, ENSOCUG00000004625	74	638	12532	2.38897	0.849604	0.406537	0.406537
GOTERM_CC_DIRECT	GO:0005861~troponin complex	2	2.32558	0.0344523	ENSOCUG00000007983, ENSOCUG00000010424	74	6	12532	56.4505	0.873628	0.406537	0.406537
GOTERM_CC_DIRECT	GO:0070062~extracellular exosome	18	20.9302	0.0445777	ENSOCUG00000024745, ENSOCUG00000017141, ENSOCUG00000010917, ENSOCUG00000027203, ENSOCUG00000001114, ENSOCUG00000008818, ENSOCUG00000009529, ENSOCUG00000004691, ENSOCUG00000003372, ENSOCUG00000007730, ENSOCUG00000011842, ENSOCUG00000006494, ENSOCUG00000005152, ENSOCUG00000029278, ENSOCUG00000009244, ENSOCUG00000016831, ENSOCUG00000005091, ENSOCUG00000011658	74	1907	12532	1.59849	0.932153	0.438347	0.438347
GOTERM_CC_DIRECT	GO:0030016~myofibril	2	2.32558	0.0839469	ENSOCUG00000011037, ENSOCUG00000025586	74	15	12532	22.5802	0.994333	0.707552	0.707552
GOTERM_MF_DIRECT	GO:0005509~calcium ion binding	10	11.6279	0.000405522	ENSOCUG00000011842, ENSOCUG00000007983, ENSOCUG00000008303, ENSOCUG00000009244, ENSOCUG00000010829, ENSOCUG00000025586, ENSOCUG00000009174, ENSOCUG00000001114, ENSOCUG00000012392, ENSOCUG00000022646	53	449	10144	4.26272	0.0272042	0.0275755	0.0275755
GOTERM_MF_DIRECT	GO:0070330~aromatase activity	3	3.48837	0.00508552	ENSOCUG00000022951, ENSOCUG00000006796, ENSOCUG00000023380	53	21	10144	27.3423	0.292981	0.172908	0.172908
GOTERM_MF_DIRECT	GO:0005215~transporter activity	3	3.48837	0.0702911	ENSOCUG00000009646, ENSOCUG00000009486, ENSOCUG00000027714	53	85	10144	6.75516	0.99296	1	1
GOTERM_MF_DIRECT	GO:0016712~oxidoreductase activity, acting on paired donors, with incorporation or reduction of molecular oxygen, reduced flavin or flavoprotein as one donor, and incorporation of one atom of oxygen	2	2.32558	0.0837247	ENSOCUG00000022951, ENSOCUG00000023380	53	17	10144	22.5172	0.997383	1	1
KEGG_PATHWAY	ocu04260:Cardiac muscle contraction	5	5.81395	0.000138929	ENSOCUG00000007983, ENSOCUG00000011037, ENSOCUG00000010829, ENSOCUG00000025586, ENSOCUG00000012392	26	80	7342	17.649	0.0102288	0.0104196	0.0104196
KEGG_PATHWAY	ocu04261:Adrenergic signaling in cardiomyocytes	5	5.81395	0.00117333	ENSOCUG00000007983, ENSOCUG00000011037, ENSOCUG00000010829, ENSOCUG00000025586, ENSOCUG00000012392	26	140	7342	10.0852	0.0832104	0.0439998	0.0439998
KEGG_PATHWAY	ocu04510:Focal adhesion	4	4.65116	0.031397	ENSOCUG00000009244, ENSOCUG00000025586, ENSOCUG00000024036, ENSOCUG00000002486	26	205	7342	5.50994	0.90564	0.502517	0.502517
KEGG_PATHWAY	ocu04512:ECM-receptor interaction	3	3.48837	0.0349068	ENSOCUG00000009244, ENSOCUG00000024036, ENSOCUG00000002486	26	87	7342	9.7374	0.927869	0.502517	0.502517
KEGG_PATHWAY	ocu05410:Hypertrophic cardiomyopathy (HCM)	3	3.48837	0.0356451	ENSOCUG00000007983, ENSOCUG00000025586, ENSOCUG00000012392	26	88	7342	9.62675	0.93184	0.502517	0.502517
KEGG_PATHWAY	ocu05414:Dilated cardiomyopathy	3	3.48837	0.0402013	ENSOCUG00000007983, ENSOCUG00000025586, ENSOCUG00000012392	26	94	7342	9.01227	0.95199	0.502517	0.502517
KEGG_PATHWAY	ocu05204:Chemical carcinogenesis	3	3.48837	0.0499353	ENSOCUG00000022951, ENSOCUG00000006796, ENSOCUG00000023380	26	106	7342	7.99202	0.977419	0.535021	0.535021

## Sheet: STRING GO-KEGG Enrichment
Biological Process (STRING)
#term ID	term description	observed gene count	background gene count	false discovery rate	matching proteins in your network (IDs)	matching proteins in your network (labels)
GO:0006950	response to stress	7	110	0.00039	ENSOCUP00000002802,ENSOCUP00000003988,ENSOCUP00000007180,ENSOCUP00000007456,ENSOCUP00000017760,ENSOCUP00000018611,ENSOCUP00000021003	IL1RN,MCP2,MMP12,ORM1,S100A12,S100A9,SAA1
GO:0006952	defense response	6	62	0.00039	ENSOCUP00000002802,ENSOCUP00000003988,ENSOCUP00000007456,ENSOCUP00000017760,ENSOCUP00000018611,ENSOCUP00000021003	IL1RN,MCP2,ORM1,S100A12,S100A9,SAA1
GO:0006954	inflammatory response	5	35	0.00039	ENSOCUP00000003988,ENSOCUP00000007456,ENSOCUP00000017760,ENSOCUP00000018611,ENSOCUP00000021003	IL1RN,ORM1,S100A12,S100A9,SAA1
GO:0006955	immune response	4	52	0.0142	ENSOCUP00000002802,ENSOCUP00000007456,ENSOCUP00000018611,ENSOCUP00000021003	IL1RN,MCP2,S100A12,S100A9
GO:0060047	heart contraction	2	5	0.0304	ENSOCUP00000006896,ENSOCUP00000015748	MYL2,TNNC1
GO:0065007	biological regulation	8	379	0.0304	ENSOCUP00000003988,ENSOCUP00000006896,ENSOCUP00000007456,ENSOCUP00000007616,ENSOCUP00000008219,ENSOCUP00000015748,ENSOCUP00000021003,ENSOCUP00000021115	APOBEC1,CKB,IL1RN,MYL2,ORM1,S100A9,TNNC1,WFDC2
GO:0007507	heart development	2	9	0.04	ENSOCUP00000006896,ENSOCUP00000015748	MYL2,TNNC1
Cellular Component (STRING)
#term ID	term description	observed gene count	background gene count	false discovery rate	matching proteins in your network (IDs)	matching proteins in your network (labels)
GO:0005576	extracellular region	9	194	2.48e-05	ENSOCUP00000002802,ENSOCUP00000003988,ENSOCUP00000007180,ENSOCUP00000007456,ENSOCUP00000008181,ENSOCUP00000008219,ENSOCUP00000017760,ENSOCUP00000018611,ENSOCUP00000021003	CSN1S1,IL1RN,MCP2,MMP12,ORM1,S100A12,S100A9,SAA1,WFDC2
GO:0005856	cytoskeleton	6	64	2.48e-05	ENSOCUP00000006896,ENSOCUP00000007456,ENSOCUP00000008977,ENSOCUP00000015748,ENSOCUP00000018611,ENSOCUP00000021291	MYH7,MYL2,S100A12,S100A9,TNNC1,TNNI1
GO:0030017	sarcomere	4	9	2.48e-05	ENSOCUP00000006896,ENSOCUP00000008977,ENSOCUP00000015748,ENSOCUP00000021291	MYH7,MYL2,TNNC1,TNNI1
GO:0015629	actin cytoskeleton	4	21	5.98e-05	ENSOCUP00000006896,ENSOCUP00000008977,ENSOCUP00000015748,ENSOCUP00000021291	MYH7,MYL2,TNNC1,TNNI1
GO:0005737	cytoplasm	10	397	0.00026	ENSOCUP00000005874,ENSOCUP00000006896,ENSOCUP00000007456,ENSOCUP00000007616,ENSOCUP00000008977,ENSOCUP00000015748,ENSOCUP00000016348,ENSOCUP00000018611,ENSOCUP00000021115,ENSOCUP00000021291	APOBEC1,CKB,CYP2A10,CYP3A6,MYH7,MYL2,S100A12,S100A9,TNNC1,TNNI1
GO:0043229	intracellular organelle	9	339	0.0003	ENSOCUP00000005874,ENSOCUP00000006896,ENSOCUP00000007456,ENSOCUP00000007616,ENSOCUP00000008977,ENSOCUP00000015748,ENSOCUP00000016348,ENSOCUP00000018611,ENSOCUP00000021291	CKB,CYP2A10,CYP3A6,MYH7,MYL2,S100A12,S100A9,TNNC1,TNNI1
GO:0044430	cytoskeletal part	4	47	0.00041	ENSOCUP00000006896,ENSOCUP00000008977,ENSOCUP00000015748,ENSOCUP00000021291	MYH7,MYL2,TNNC1,TNNI1
GO:0044421	extracellular region part	5	101	0.00063	ENSOCUP00000002802,ENSOCUP00000003988,ENSOCUP00000007180,ENSOCUP00000017760,ENSOCUP00000021003	IL1RN,MCP2,MMP12,ORM1,SAA1
GO:0005861	troponin complex	2	3	0.0007	ENSOCUP00000006896,ENSOCUP00000008977	TNNC1,TNNI1
GO:0044444	cytoplasmic part	7	277	0.0016	ENSOCUP00000005874,ENSOCUP00000006896,ENSOCUP00000007616,ENSOCUP00000008977,ENSOCUP00000015748,ENSOCUP00000016348,ENSOCUP00000021291	CKB,CYP2A10,CYP3A6,MYH7,MYL2,TNNC1,TNNI1
GO:0016459	myosin complex	2	7	0.0019	ENSOCUP00000015748,ENSOCUP00000021291	MYH7,MYL2
GO:0044446	intracellular organelle part	6	217	0.0021	ENSOCUP00000005874,ENSOCUP00000006896,ENSOCUP00000008977,ENSOCUP00000015748,ENSOCUP00000016348,ENSOCUP00000021291	CYP2A10,CYP3A6,MYH7,MYL2,TNNC1,TNNI1
GO:0005615	extracellular space	4	88	0.0024	ENSOCUP00000002802,ENSOCUP00000003988,ENSOCUP00000017760,ENSOCUP00000021003	IL1RN,MCP2,ORM1,SAA1
GO:0032991	protein-containing complex	5	177	0.0046	ENSOCUP00000006896,ENSOCUP00000008977,ENSOCUP00000015748,ENSOCUP00000017760,ENSOCUP00000021291	MYH7,MYL2,SAA1,TNNC1,TNNI1
GO:0016020	membrane	6	367	0.0223	ENSOCUP00000005874,ENSOCUP00000006379,ENSOCUP00000007456,ENSOCUP00000015091,ENSOCUP00000016348,ENSOCUP00000018611	ATP12A,CYP2A10,CYP3A6,S100A12,S100A9,SLC5A1
Molecular Function (STRING)
#term ID	term description	observed gene count	background gene count	false discovery rate	matching proteins in your network (IDs)	matching proteins in your network (labels)
GO:0043167	ion binding	13	303	1.11e-06	ENSOCUP00000005874,ENSOCUP00000006379,ENSOCUP00000006896,ENSOCUP00000007180,ENSOCUP00000007456,ENSOCUP00000007616,ENSOCUP00000008977,ENSOCUP00000015748,ENSOCUP00000016348,ENSOCUP00000017760,ENSOCUP00000018611,ENSOCUP00000021115,ENSOCUP00000021291	APOBEC1,ATP12A,CKB,CYP2A10,CYP3A6,MMP12,MYH7,MYL2,S100A12,S100A9,SAA1,TNNC1,TNNI1
GO:0005488	binding	15	483	2.4e-06	ENSOCUP00000005874,ENSOCUP00000006379,ENSOCUP00000006896,ENSOCUP00000007180,ENSOCUP00000007456,ENSOCUP00000007616,ENSOCUP00000008977,ENSOCUP00000015748,ENSOCUP00000016348,ENSOCUP00000017529,ENSOCUP00000017760,ENSOCUP00000018611,ENSOCUP00000021003,ENSOCUP00000021115,ENSOCUP00000021291	APOBEC1,ATP12A,CKB,CYP2A10,CYP3A6,ENSOCUG00000023566,IL1RN,MMP12,MYH7,MYL2,S100A12,S100A9,SAA1,TNNC1,TNNI1
GO:0046872	metal ion binding	10	201	5.74e-06	ENSOCUP00000005874,ENSOCUP00000006379,ENSOCUP00000006896,ENSOCUP00000007180,ENSOCUP00000007456,ENSOCUP00000008977,ENSOCUP00000015748,ENSOCUP00000016348,ENSOCUP00000018611,ENSOCUP00000021115	APOBEC1,ATP12A,CYP2A10,CYP3A6,MMP12,MYL2,S100A12,S100A9,TNNC1,TNNI1
GO:0008092	cytoskeletal protein binding	4	37	0.0014	ENSOCUP00000006896,ENSOCUP00000007456,ENSOCUP00000008977,ENSOCUP00000021291	MYH7,S100A9,TNNC1,TNNI1
GO:0046914	transition metal ion binding	5	79	0.0015	ENSOCUP00000005874,ENSOCUP00000007180,ENSOCUP00000007456,ENSOCUP00000016348,ENSOCUP00000021115	APOBEC1,CYP2A10,CYP3A6,MMP12,S100A9
GO:0005509	calcium ion binding	4	49	0.0028	ENSOCUP00000006896,ENSOCUP00000007456,ENSOCUP00000015748,ENSOCUP00000018611	MYL2,S100A12,S100A9,TNNC1
GO:0003779	actin binding	3	22	0.0044	ENSOCUP00000006896,ENSOCUP00000008977,ENSOCUP00000021291	MYH7,TNNC1,TNNI1
GO:0003824	catalytic activity	7	285	0.0109	ENSOCUP00000005874,ENSOCUP00000006379,ENSOCUP00000007180,ENSOCUP00000007616,ENSOCUP00000016348,ENSOCUP00000021115,ENSOCUP00000021291	APOBEC1,ATP12A,CKB,CYP2A10,CYP3A6,MMP12,MYH7
GO:0043168	anion binding	5	144	0.013	ENSOCUP00000006379,ENSOCUP00000007456,ENSOCUP00000007616,ENSOCUP00000017760,ENSOCUP00000021291	ATP12A,CKB,MYH7,S100A9,SAA1
GO:0008017	microtubule binding	2	9	0.0158	ENSOCUP00000007456,ENSOCUP00000021291	MYH7,S100A9
GO:0008270	zinc ion binding	3	43	0.0178	ENSOCUP00000007180,ENSOCUP00000007456,ENSOCUP00000021115	APOBEC1,MMP12,S100A9
GO:0016787	hydrolase activity	4	105	0.0219	ENSOCUP00000006379,ENSOCUP00000007180,ENSOCUP00000021115,ENSOCUP00000021291	APOBEC1,ATP12A,MMP12,MYH7
GO:0097367	carbohydrate derivative binding	4	112	0.0253	ENSOCUP00000006379,ENSOCUP00000007616,ENSOCUP00000017760,ENSOCUP00000021291	ATP12A,CKB,MYH7,SAA1
GO:1901363	heterocyclic compound binding	5	196	0.03	ENSOCUP00000005874,ENSOCUP00000006379,ENSOCUP00000007616,ENSOCUP00000016348,ENSOCUP00000021291	ATP12A,CKB,CYP2A10,CYP3A6,MYH7
GO:0005515	protein binding	5	200	0.0307	ENSOCUP00000006896,ENSOCUP00000007456,ENSOCUP00000008977,ENSOCUP00000021003,ENSOCUP00000021291	IL1RN,MYH7,S100A9,TNNC1,TNNI1
GO:0070330	aromatase activity	2	17	0.0307	ENSOCUP00000005874,ENSOCUP00000016348	CYP2A10,CYP3A6
GO:0097159	organic cyclic compound binding	5	203	0.0307	ENSOCUP00000005874,ENSOCUP00000006379,ENSOCUP00000007616,ENSOCUP00000016348,ENSOCUP00000021291	ATP12A,CKB,CYP2A10,CYP3A6,MYH7
GO:0036094	small molecule binding	4	140	0.0389	ENSOCUP00000006379,ENSOCUP00000007456,ENSOCUP00000007616,ENSOCUP00000021291	ATP12A,CKB,MYH7,S100A9
GO:0005524	ATP binding	3	78	0.0479	ENSOCUP00000006379,ENSOCUP00000007616,ENSOCUP00000021291	ATP12A,CKB,MYH7
KEGG
#term ID	term description	observed gene count	background gene count	false discovery rate	matching proteins in your network (IDs)	matching proteins in your network (labels)
ocu04260	Cardiac muscle contraction	5	63	0.0024	ENSOCUP00000006896,ENSOCUP00000009315,ENSOCUP00000010665,ENSOCUP00000015748,ENSOCUP00000021291	MYH7,MYL2,MYL3,MYL4,TNNC1
ocu04261	Adrenergic signaling in cardiomyocytes	5	117	0.0189	ENSOCUP00000006896,ENSOCUP00000009315,ENSOCUP00000010665,ENSOCUP00000015748,ENSOCUP00000021291	MYH7,MYL2,MYL3,MYL4,TNNC1

## Sheet: GSEA- Low Humidity
NAME	GS<br> follow link to MSigDB	GS DETAILS	SIZE	ES	NES	NOM p-val	FDR q-val	FWER p-val	RANK AT MAX	LEADING EDGE
GO_MF_OC_OLFACTORY_RECEPTOR_ACTIVITY	GO_MF_OC_OLFACTORY_RECEPTOR_ACTIVITY	Details ...	163	0.875689	3.04883	0	0	0	1692	tags=1%, list=12%, signal=1%
GO_BP_OC_DETECTION_OF_CHEMICAL_STIMULUS_INVOLVED_IN_SENSORY_PERCEPTION_OF_SMELL	GO_BP_OC_DETECTION_OF_CHEMICAL_STIMULUS_INVOLVED_IN_SENSORY_PERCEPTION_OF_SMELL	Details ...	163	0.875689	3.01994	0	0	0	1692	tags=1%, list=12%, signal=1%
GO_BP_OC_UBIQUITIN-DEPENDENT_PROTEIN_CATABOLIC_PROCESS	GO_BP_OC_UBIQUITIN-DEPENDENT_PROTEIN_CATABOLIC_PROCESS	Details ...	97	0.553302	1.81226	0	0.136106	0.247	3103	tags=53%, list=23%, signal=67%
GO_CC_OC_SARCOPLASMIC_RETICULUM	GO_CC_OC_SARCOPLASMIC_RETICULUM	Details ...	19	0.77694	1.78151	0.00294985	0.164022	0.366	2481	tags=63%, list=18%, signal=77%
GO_CC_OC_MITOCHONDRIAL_NUCLEOID	GO_CC_OC_MITOCHONDRIAL_NUCLEOID	Details ...	18	0.738359	1.72842	0.00333333	0.258318	0.601	2748	tags=56%, list=20%, signal=69%
GO_BP_OC_CELLULAR_RESPONSE_TO_CALCIUM_ION	GO_BP_OC_CELLULAR_RESPONSE_TO_CALCIUM_ION	Details ...	18	0.754564	1.68922	0	0.355082	0.782	1693	tags=50%, list=12%, signal=57%
GO_MF_OC_UBIQUITIN_THIOLESTERASE_ACTIVITY	GO_MF_OC_UBIQUITIN_THIOLESTERASE_ACTIVITY	Details ...	52	0.579935	1.66833	0.00490196	0.388878	0.855	2395	tags=46%, list=17%, signal=56%
GO_BP_OC_POSITIVE_REGULATION_OF_MULTICELLULAR_ORGANISM_GROWTH	GO_BP_OC_POSITIVE_REGULATION_OF_MULTICELLULAR_ORGANISM_GROWTH	Details ...	25	0.648249	1.62491	0.0126183	0.536349	0.951	1918	tags=32%, list=14%, signal=37%
GO_MF_OC_OXIDOREDUCTASE_ACTIVITY_ACTING_ON_THE_CH-CH_GROUP_OF_DONORS	GO_MF_OC_OXIDOREDUCTASE_ACTIVITY_ACTING_ON_THE_CH-CH_GROUP_OF_DONORS	Details ...	16	0.740605	1.62485	0.00549451	0.476754	0.951	2506	tags=63%, list=18%, signal=76%
GO_BP_OC_RESPONSE_TO_DRUG	GO_BP_OC_RESPONSE_TO_DRUG	Details ...	54	0.53401	1.60817	0	0.500552	0.97	1710	tags=28%, list=12%, signal=32%
GO_CC_OC_PROTEIN_PHOSPHATASE_TYPE_2A_COMPLEX	GO_CC_OC_PROTEIN_PHOSPHATASE_TYPE_2A_COMPLEX	Details ...	15	0.71465	1.5768	0.01983	0.608286	0.994	579	tags=27%, list=4%, signal=28%
GO_BP_OC_LENS_DEVELOPMENT_IN_CAMERA-TYPE_EYE	GO_BP_OC_LENS_DEVELOPMENT_IN_CAMERA-TYPE_EYE	Details ...	15	0.725659	1.57372	0.0338983	0.572383	0.994	2446	tags=47%, list=18%, signal=57%
GO_BP_OC_JNK_CASCADE	GO_BP_OC_JNK_CASCADE	Details ...	17	0.688837	1.55637	0.0116959	0.604403	0.999	1993	tags=41%, list=14%, signal=48%
GO_MF_OC_TRANSFERASE_ACTIVITY_TRANSFERRING_ACYL_GROUPS	GO_MF_OC_TRANSFERASE_ACTIVITY_TRANSFERRING_ACYL_GROUPS	Details ...	31	0.591978	1.55552	0.0100334	0.565256	0.999	2099	tags=39%, list=15%, signal=46%
GO_BP_OC_RESPONSE_TO_GLUCOSE_STIMULUS	GO_BP_OC_RESPONSE_TO_GLUCOSE_STIMULUS	Details ...	15	0.700601	1.53671	0.0377907	0.611603	1	1344	tags=13%, list=10%, signal=15%
GO_BP_OC_CARDIAC_MUSCLE_CELL_DIFFERENTIATION	GO_BP_OC_CARDIAC_MUSCLE_CELL_DIFFERENTIATION	Details ...	15	0.686584	1.52042	0.0377907	0.653093	1	1766	tags=47%, list=13%, signal=53%
GO_MF_OC_HELICASE_ACTIVITY	GO_MF_OC_HELICASE_ACTIVITY	Details ...	93	0.473869	1.51463	0	0.642288	1	3434	tags=38%, list=25%, signal=50%
GO_MF_OC_INSULIN_RECEPTOR_BINDING	GO_MF_OC_INSULIN_RECEPTOR_BINDING	Details ...	18	0.655338	1.51398	0.0489297	0.610069	1	1790	tags=22%, list=13%, signal=26%
GO_BP_OC_ADULT_WALKING_BEHAVIOR	GO_BP_OC_ADULT_WALKING_BEHAVIOR	Details ...	23	0.628345	1.51329	0.0216049	0.581158	1	843	tags=22%, list=6%, signal=23%
GO_BP_OC_HIPPO_SIGNALING_CASCADE	GO_BP_OC_HIPPO_SIGNALING_CASCADE	Details ...	15	0.686693	1.50823	0.0317919	0.573327	1	2432	tags=67%, list=18%, signal=81%
GO_BP_OC_PROTEIN_DEUBIQUITINATION	GO_BP_OC_PROTEIN_DEUBIQUITINATION		21	0.645247	1.50094	0.0347003	0.576483	1	3052	tags=62%, list=22%, signal=79%
GO_BP_OC_SOCIAL_BEHAVIOR	GO_BP_OC_SOCIAL_BEHAVIOR		17	0.654728	1.49853	0.0641399	0.560737	1	3168	tags=41%, list=23%, signal=53%
GO_BP_OC_REGULATION_OF_CATALYTIC_ACTIVITY	GO_BP_OC_REGULATION_OF_CATALYTIC_ACTIVITY		15	0.676258	1.48758	0.0626781	0.578779	1	1119	tags=27%, list=8%, signal=29%
GO_BP_OC_PROTEIN_POLYUBIQUITINATION	GO_BP_OC_PROTEIN_POLYUBIQUITINATION		43	0.535115	1.48688	0.0288066	0.557822	1	2818	tags=49%, list=20%, signal=61%
GO_MF_OC_DOUBLE-STRANDED_RNA_BINDING	GO_MF_OC_DOUBLE-STRANDED_RNA_BINDING		37	0.54751	1.4856	0.0383142	0.540703	1	3077	tags=32%, list=22%, signal=42%
GO_BP_OC_PHOSPHOLIPID_TRANSPORT	GO_BP_OC_PHOSPHOLIPID_TRANSPORT		17	0.624356	1.44113	0.0645161	0.702033	1	382	tags=24%, list=3%, signal=24%
GO_BP_OC_CYTOSKELETON_ORGANIZATION	GO_BP_OC_CYTOSKELETON_ORGANIZATION		45	0.504126	1.43053	0.0254237	0.725417	1	2337	tags=31%, list=17%, signal=37%
GO_MF_OC_UBIQUITIN-SPECIFIC_PROTEASE_ACTIVITY	GO_MF_OC_UBIQUITIN-SPECIFIC_PROTEASE_ACTIVITY		30	0.558573	1.42862	0.0586207	0.708517	1	3853	tags=60%, list=28%, signal=83%
GO_BP_OC_T_CELL_DIFFERENTIATION_IN_THYMUS	GO_BP_OC_T_CELL_DIFFERENTIATION_IN_THYMUS		24	0.584181	1.4279	0.0513699	0.687802	1	1501	tags=33%, list=11%, signal=37%
GO_BP_OC_TRANSFORMING_GROWTH_FACTOR_BETA_RECEPTOR_SIGNALING_PATHWAY	GO_BP_OC_TRANSFORMING_GROWTH_FACTOR_BETA_RECEPTOR_SIGNALING_PATHWAY		37	0.524015	1.41827	0.0466102	0.707651	1	2474	tags=46%, list=18%, signal=56%
GO_MF_OC_VOLTAGE-GATED_CALCIUM_CHANNEL_ACTIVITY	GO_MF_OC_VOLTAGE-GATED_CALCIUM_CHANNEL_ACTIVITY		18	0.618955	1.41492	0.0833333	0.69926	1	1259	tags=33%, list=9%, signal=37%
GO_BP_OC_CELLULAR_RESPONSE_TO_DRUG	GO_BP_OC_CELLULAR_RESPONSE_TO_DRUG		17	0.62102	1.41444	0.0855457	0.679077	1	1711	tags=47%, list=12%, signal=54%
GO_BP_OC_POSITIVE_REGULATION_OF_ENDOTHELIAL_CELL_MIGRATION	GO_BP_OC_POSITIVE_REGULATION_OF_ENDOTHELIAL_CELL_MIGRATION		18	0.631864	1.4009	0.0833333	0.718758	1	1658	tags=56%, list=12%, signal=63%
GO_MF_OC_RNA_POLYMERASE_II_TRANSCRIPTION_FACTOR_BINDING	GO_MF_OC_RNA_POLYMERASE_II_TRANSCRIPTION_FACTOR_BINDING		19	0.592505	1.39247	0.0870968	0.734305	1	3929	tags=58%, list=29%, signal=81%
GO_MF_OC_PROTEIN_DIMERIZATION_ACTIVITY	GO_MF_OC_PROTEIN_DIMERIZATION_ACTIVITY		146	0.410787	1.39218	0.0217391	0.714403	1	2245	tags=29%, list=16%, signal=34%
GO_BP_OC_RNA_METABOLIC_PROCESS	GO_BP_OC_RNA_METABOLIC_PROCESS		15	0.627556	1.38174	0.106849	0.73948	1	1073	tags=27%, list=8%, signal=29%
GO_BP_OC_SPLEEN_DEVELOPMENT	GO_BP_OC_SPLEEN_DEVELOPMENT		19	0.598939	1.38147	0.0769231	0.720669	1	841	tags=26%, list=6%, signal=28%
GO_BP_OC_B_CELL_RECEPTOR_SIGNALING_PATHWAY	GO_BP_OC_B_CELL_RECEPTOR_SIGNALING_PATHWAY		23	0.567153	1.37985	0.0809061	0.708263	1	1058	tags=22%, list=8%, signal=24%
GO_MF_OC_VOLTAGE-GATED_ION_CHANNEL_ACTIVITY	GO_MF_OC_VOLTAGE-GATED_ION_CHANNEL_ACTIVITY		50	0.475378	1.37579	0.0454545	0.70583	1	1264	tags=18%, list=9%, signal=20%
GO_MF_OC_RNA_POLYMERASE_II_TRANSCRIPTION_COFACTOR_ACTIVITY	GO_MF_OC_RNA_POLYMERASE_II_TRANSCRIPTION_COFACTOR_ACTIVITY		21	0.565655	1.36923	0.0934579	0.714378	1	2050	tags=29%, list=15%, signal=34%
GO_MF_OC_ACID-AMINO_ACID_LIGASE_ACTIVITY	GO_MF_OC_ACID-AMINO_ACID_LIGASE_ACTIVITY		53	0.473443	1.36756	0.0337553	0.703382	1	3564	tags=53%, list=26%, signal=71%
GO_BP_OC_PEPTIDYL-THREONINE_PHOSPHORYLATION	GO_BP_OC_PEPTIDYL-THREONINE_PHOSPHORYLATION		22	0.582402	1.36494	0.095082	0.696215	1	3056	tags=77%, list=22%, signal=99%
GO_BP_OC_CAMERA-TYPE_EYE_DEVELOPMENT	GO_BP_OC_CAMERA-TYPE_EYE_DEVELOPMENT		33	0.512556	1.36285	0.0952381	0.689032	1	937	tags=15%, list=7%, signal=16%
GO_BP_OC_EMBRYONIC_HINDLIMB_MORPHOGENESIS	GO_BP_OC_EMBRYONIC_HINDLIMB_MORPHOGENESIS		24	0.555791	1.36227	0.0976431	0.675725	1	887	tags=21%, list=6%, signal=22%
GO_BP_OC_REGULATION_OF_ION_TRANSMEMBRANE_TRANSPORT	GO_BP_OC_REGULATION_OF_ION_TRANSMEMBRANE_TRANSPORT		49	0.478398	1.36023	0.0396476	0.667928	1	1264	tags=18%, list=9%, signal=20%
GO_BP_OC_ACTIN_FILAMENT_ORGANIZATION	GO_BP_OC_ACTIN_FILAMENT_ORGANIZATION		20	0.578428	1.35943	0.1	0.656169	1	1208	tags=30%, list=9%, signal=33%
GO_CC_OC_POSTSYNAPTIC_MEMBRANE	GO_CC_OC_POSTSYNAPTIC_MEMBRANE		68	0.443032	1.3521	0.0322581	0.669155	1	1083	tags=12%, list=8%, signal=13%
GO_BP_OC_PROTEIN_AUTOUBIQUITINATION	GO_BP_OC_PROTEIN_AUTOUBIQUITINATION		16	0.614736	1.34588	0.119403	0.678648	1	3054	tags=50%, list=22%, signal=64%
GO_MF_OC_RNA_POLYMERASE_II_CORE_PROMOTER_SEQUENCE-SPECIFIC_DNA_BINDING	GO_MF_OC_RNA_POLYMERASE_II_CORE_PROMOTER_SEQUENCE-SPECIFIC_DNA_BINDING		20	0.569977	1.34271	0.102564	0.676419	1	3195	tags=45%, list=23%, signal=59%
GO_CC_OC_NUCLEAR_BODY	GO_CC_OC_NUCLEAR_BODY		15	0.606368	1.33697	0.128205	0.684462	1	2216	tags=40%, list=16%, signal=48%
GO_MF_OC_CHAPERONE_BINDING	GO_MF_OC_CHAPERONE_BINDING		17	0.592762	1.33589	0.11326	0.675001	1	1576	tags=35%, list=11%, signal=40%
GO_MF_OC_EXTRACELLULAR_LIGAND-GATED_ION_CHANNEL_ACTIVITY	GO_MF_OC_EXTRACELLULAR_LIGAND-GATED_ION_CHANNEL_ACTIVITY		39	0.481917	1.33515	0.0719697	0.664569	1	1083	tags=13%, list=8%, signal=14%
GO_MF_OC_EUKARYOTIC_CELL_SURFACE_BINDING	GO_MF_OC_EUKARYOTIC_CELL_SURFACE_BINDING		16	0.599537	1.33402	0.110215	0.65582	1	1146	tags=19%, list=8%, signal=20%
GO_MF_OC_HEAT_SHOCK_PROTEIN_BINDING	GO_MF_OC_HEAT_SHOCK_PROTEIN_BINDING		42	0.474935	1.33343	0.064257	0.645725	1	1724	tags=29%, list=13%, signal=33%
GO_BP_OC_SOMITOGENESIS	GO_BP_OC_SOMITOGENESIS		35	0.491431	1.32119	0.104	0.677928	1	1807	tags=31%, list=13%, signal=36%
GO_BP_OC_ER_TO_GOLGI_VESICLE-MEDIATED_TRANSPORT	GO_BP_OC_ER_TO_GOLGI_VESICLE-MEDIATED_TRANSPORT		16	0.601359	1.32111	0.148571	0.666138	1	2691	tags=50%, list=20%, signal=62%
GO_BP_OC_REGULATION_OF_PROTEIN_PHOSPHORYLATION	GO_BP_OC_REGULATION_OF_PROTEIN_PHOSPHORYLATION		20	0.567354	1.31994	0.141994	0.658812	1	3365	tags=55%, list=24%, signal=73%
GO_MF_OC_PROTEIN_SERINE_THREONINE_PHOSPHATASE_ACTIVITY	GO_MF_OC_PROTEIN_SERINE_THREONINE_PHOSPHATASE_ACTIVITY		23	0.546262	1.31483	0.122324	0.664176	1	1140	tags=30%, list=8%, signal=33%
GO_BP_OC_BRAIN_DEVELOPMENT	GO_BP_OC_BRAIN_DEVELOPMENT		67	0.436041	1.31307	0.0546448	0.659083	1	2301	tags=24%, list=17%, signal=29%
GO_BP_OC_PROTEASOMAL_UBIQUITIN-DEPENDENT_PROTEIN_CATABOLIC_PROCESS	GO_BP_OC_PROTEASOMAL_UBIQUITIN-DEPENDENT_PROTEIN_CATABOLIC_PROCESS		33	0.48323	1.31302	0.116788	0.648278	1	3826	tags=55%, list=28%, signal=75%
GO_BP_OC_POSITIVE_REGULATION_OF_TRANSLATION	GO_BP_OC_POSITIVE_REGULATION_OF_TRANSLATION		15	0.604331	1.31127	0.133903	0.643526	1	1885	tags=27%, list=14%, signal=31%
GO_BP_OC_REGULATION_OF_CALCIUM_ION_TRANSPORT_VIA_VOLTAGE-GATED_CALCIUM_CHANNEL_ACTIVITY	GO_BP_OC_REGULATION_OF_CALCIUM_ION_TRANSPORT_VIA_VOLTAGE-GATED_CALCIUM_CHANNEL_ACTIVITY		19	0.565079	1.30188	0.139752	0.665118	1	1259	tags=26%, list=9%, signal=29%
GO_CC_OC_MITOCHONDRIAL_OUTER_MEMBRANE	GO_CC_OC_MITOCHONDRIAL_OUTER_MEMBRANE		33	0.491431	1.29682	0.0944056	0.672329	1	3354	tags=58%, list=24%, signal=76%
GO_MF_OC_UNFOLDED_PROTEIN_BINDING	GO_MF_OC_UNFOLDED_PROTEIN_BINDING		57	0.448218	1.29177	0.0726496	0.68047	1	2732	tags=33%, list=20%, signal=41%
GO_MF_OC_RNA_BINDING	GO_MF_OC_RNA_BINDING		198	0.367166	1.29009	0.0178571	0.675855	1	3272	tags=34%, list=24%, signal=44%
GO_MF_OC_VOLTAGE-GATED_POTASSIUM_CHANNEL_ACTIVITY	GO_MF_OC_VOLTAGE-GATED_POTASSIUM_CHANNEL_ACTIVITY		44	0.463614	1.2894	0.0929204	0.667904	1	665	tags=11%, list=5%, signal=12%
GO_MF_OC_UBIQUITIN-PROTEIN_LIGASE_ACTIVITY	GO_MF_OC_UBIQUITIN-PROTEIN_LIGASE_ACTIVITY		154	0.376693	1.27654	0.0206186	0.701631	1	2231	tags=32%, list=16%, signal=38%
GO_BP_OC_ANTERIOR_POSTERIOR_PATTERN_SPECIFICATION	GO_BP_OC_ANTERIOR_POSTERIOR_PATTERN_SPECIFICATION		78	0.408511	1.27408	0.0677966	0.700641	1	1419	tags=15%, list=10%, signal=17%
GO_BP_OC_CHOLESTEROL_METABOLIC_PROCESS	GO_BP_OC_CHOLESTEROL_METABOLIC_PROCESS		30	0.487846	1.26964	0.13141	0.706281	1	161	tags=10%, list=1%, signal=10%
GO_BP_OC_DEFENSE_RESPONSE_TO_BACTERIUM	GO_BP_OC_DEFENSE_RESPONSE_TO_BACTERIUM		30	0.48285	1.26845	0.140794	0.700395	1	289	tags=10%, list=2%, signal=10%
GO_BP_OC_NEURON_MIGRATION	GO_BP_OC_NEURON_MIGRATION		73	0.408014	1.26741	0.0584795	0.694008	1	3492	tags=30%, list=25%, signal=40%
GO_CC_OC_CYTOPLASMIC_MICROTUBULE	GO_CC_OC_CYTOPLASMIC_MICROTUBULE		15	0.579077	1.26646	0.171687	0.687349	1	1441	tags=40%, list=10%, signal=45%
GO_BP_OC_MUSCLE_ORGAN_DEVELOPMENT	GO_BP_OC_MUSCLE_ORGAN_DEVELOPMENT		19	0.552447	1.26628	0.146789	0.678728	1	2167	tags=42%, list=16%, signal=50%
GO_CC_OC_CYTOPLASMIC_MRNA_PROCESSING_BODY	GO_CC_OC_CYTOPLASMIC_MRNA_PROCESSING_BODY		17	0.559847	1.26025	0.170391	0.689694	1	2431	tags=41%, list=18%, signal=50%
GO_BP_OC_CELLULAR_RESPONSE_TO_INSULIN_STIMULUS	GO_BP_OC_CELLULAR_RESPONSE_TO_INSULIN_STIMULUS		25	0.502066	1.2557	0.151724	0.695769	1	2441	tags=40%, list=18%, signal=49%
GO_BP_OC_POST-EMBRYONIC_DEVELOPMENT	GO_BP_OC_POST-EMBRYONIC_DEVELOPMENT		56	0.438457	1.25231	0.0909091	0.698202	1	2741	tags=39%, list=20%, signal=49%
GO_CC_OC_VOLTAGE-GATED_POTASSIUM_CHANNEL_COMPLEX	GO_CC_OC_VOLTAGE-GATED_POTASSIUM_CHANNEL_COMPLEX		31	0.480612	1.24974	0.152482	0.697627	1	665	tags=16%, list=5%, signal=17%
GO_BP_OC_NEGATIVE_REGULATION_OF_APOPTOTIC_PROCESS	GO_BP_OC_NEGATIVE_REGULATION_OF_APOPTOTIC_PROCESS		200	0.349979	1.24804	0	0.693998	1	1861	tags=25%, list=14%, signal=28%
GO_BP_OC_DENDRITE_MORPHOGENESIS	GO_BP_OC_DENDRITE_MORPHOGENESIS		18	0.540898	1.24717	0.180473	0.687695	1	3253	tags=50%, list=24%, signal=65%
GO_BP_OC_GASTRULATION_WITH_MOUTH_FORMING_SECOND	GO_BP_OC_GASTRULATION_WITH_MOUTH_FORMING_SECOND		15	0.559071	1.24302	0.186813	0.692799	1	2474	tags=40%, list=18%, signal=49%
GO_BP_OC_DENDRITE_DEVELOPMENT	GO_BP_OC_DENDRITE_DEVELOPMENT		26	0.509741	1.24181	0.15411	0.687989	1	1071	tags=15%, list=8%, signal=17%
GO_BP_OC_SKELETAL_MUSCLE_TISSUE_DEVELOPMENT	GO_BP_OC_SKELETAL_MUSCLE_TISSUE_DEVELOPMENT		29	0.482217	1.23899	0.142857	0.689182	1	1370	tags=38%, list=10%, signal=42%
GO_BP_OC_VIRAL_REPRODUCTION	GO_BP_OC_VIRAL_REPRODUCTION		20	0.529266	1.23559	0.212828	0.692313	1	963	tags=15%, list=7%, signal=16%
GO_BP_OC_ANDROGEN_RECEPTOR_SIGNALING_PATHWAY	GO_BP_OC_ANDROGEN_RECEPTOR_SIGNALING_PATHWAY		16	0.554849	1.23442	0.178161	0.687635	1	1128	tags=31%, list=8%, signal=34%
GO_CC_OC_TRANSCRIPTIONAL_REPRESSOR_COMPLEX	GO_CC_OC_TRANSCRIPTIONAL_REPRESSOR_COMPLEX		28	0.490402	1.23031	0.19	0.692637	1	1711	tags=29%, list=12%, signal=33%
GO_BP_OC_TRNA_AMINOACYLATION_FOR_PROTEIN_TRANSLATION	GO_BP_OC_TRNA_AMINOACYLATION_FOR_PROTEIN_TRANSLATION		32	0.465549	1.2255	0.140845	0.700247	1	3221	tags=38%, list=23%, signal=49%
GO_BP_OC_INTRACELLULAR_SIGNAL_TRANSDUCTION	GO_BP_OC_INTRACELLULAR_SIGNAL_TRANSDUCTION		201	0.353482	1.22521	0.0172414	0.693087	1	2308	tags=30%, list=17%, signal=36%
GO_MF_OC_N-ACETYLTRANSFERASE_ACTIVITY	GO_MF_OC_N-ACETYLTRANSFERASE_ACTIVITY		15	0.559218	1.22402	0.22093	0.689234	1	992	tags=20%, list=7%, signal=22%
GO_BP_OC_REGULATION_OF_CELL_MIGRATION	GO_BP_OC_REGULATION_OF_CELL_MIGRATION		35	0.454699	1.22235	0.160305	0.686563	1	1466	tags=26%, list=11%, signal=29%
GO_MF_OC_AMINOACYL-TRNA_LIGASE_ACTIVITY	GO_MF_OC_AMINOACYL-TRNA_LIGASE_ACTIVITY		32	0.465549	1.21965	0.174194	0.686615	1	3221	tags=38%, list=23%, signal=49%
GO_BP_OC_PROTEIN_DEPHOSPHORYLATION	GO_BP_OC_PROTEIN_DEPHOSPHORYLATION		95	0.381118	1.21872	0.12766	0.682235	1	1765	tags=28%, list=13%, signal=32%
GO_BP_OC_PROTEIN_IMPORT_INTO_NUCLEUS	GO_BP_OC_PROTEIN_IMPORT_INTO_NUCLEUS		24	0.486894	1.21814	0.160991	0.676456	1	2005	tags=50%, list=15%, signal=58%
GO_BP_OC_PROTEIN_STABILIZATION	GO_BP_OC_PROTEIN_STABILIZATION		38	0.444138	1.21626	0.147541	0.674586	1	2483	tags=39%, list=18%, signal=48%
GO_BP_OC_DNA-DEPENDENT_TRANSCRIPTION_INITIATION	GO_BP_OC_DNA-DEPENDENT_TRANSCRIPTION_INITIATION		17	0.538342	1.2131	0.221538	0.676937	1	3493	tags=53%, list=25%, signal=71%
GO_MF_OC_PHOSPHOLIPASE_C_ACTIVITY	GO_MF_OC_PHOSPHOLIPASE_C_ACTIVITY		16	0.540228	1.20432	0.233333	0.696982	1	973	tags=38%, list=7%, signal=40%
GO_MF_OC_CHROMATIN_DNA_BINDING	GO_MF_OC_CHROMATIN_DNA_BINDING		15	0.56071	1.20233	0.227513	0.695824	1	3932	tags=40%, list=29%, signal=56%
GO_BP_OC_CELLULAR_PROTEIN_MODIFICATION_PROCESS	GO_BP_OC_CELLULAR_PROTEIN_MODIFICATION_PROCESS		58	0.404664	1.20113	0.119617	0.692146	1	2143	tags=43%, list=16%, signal=51%
GO_MF_OC_SMAD_BINDING	GO_MF_OC_SMAD_BINDING		24	0.479256	1.1865	0.210884	0.731076	1	2694	tags=38%, list=20%, signal=47%
GO_CC_OC_NUCLEAR_PORE	GO_CC_OC_NUCLEAR_PORE		17	0.530935	1.17784	0.226708	0.752206	1	3000	tags=53%, list=22%, signal=68%
GO_BP_OC_TRNA_PROCESSING	GO_BP_OC_TRNA_PROCESSING		22	0.483151	1.17645	0.243553	0.749062	1	2725	tags=32%, list=20%, signal=40%
GO_BP_OC_EMBRYONIC_PATTERN_SPECIFICATION	GO_BP_OC_EMBRYONIC_PATTERN_SPECIFICATION		16	0.538116	1.17621	0.264789	0.742463	1	2430	tags=44%, list=18%, signal=53%
GO_BP_OC_INSULIN_RECEPTOR_SIGNALING_PATHWAY	GO_BP_OC_INSULIN_RECEPTOR_SIGNALING_PATHWAY		16	0.528431	1.17517	0.251497	0.738656	1	1753	tags=44%, list=13%, signal=50%
GO_BP_OC_DEFENSE_RESPONSE	GO_BP_OC_DEFENSE_RESPONSE		19	0.503381	1.17373	0.266436	0.736155	1	2	tags=5%, list=0%, signal=5%
GO_MF_OC_PHOSPHATIDYLINOSITOL_PHOSPHOLIPASE_C_ACTIVITY	GO_MF_OC_PHOSPHATIDYLINOSITOL_PHOSPHOLIPASE_C_ACTIVITY		17	0.51848	1.16909	0.245614	0.742937	1	973	tags=29%, list=7%, signal=32%
GO_BP_OC_HEMOPOIESIS	GO_BP_OC_HEMOPOIESIS		45	0.419492	1.16778	0.162162	0.740204	1	557	tags=16%, list=4%, signal=16%
GO_BP_OC_GLUCOSE_HOMEOSTASIS	GO_BP_OC_GLUCOSE_HOMEOSTASIS		37	0.436406	1.16708	0.211765	0.73559	1	1825	tags=19%, list=13%, signal=22%
GO_BP_OC_DNA_REPAIR	GO_BP_OC_DNA_REPAIR		79	0.367092	1.16508	0.153846	0.735094	1	2291	tags=22%, list=17%, signal=26%
GO_MF_OC_TRANSCRIPTION_REGULATORY_REGION_DNA_BINDING	GO_MF_OC_TRANSCRIPTION_REGULATORY_REGION_DNA_BINDING		108	0.351062	1.16284	0.1375	0.735699	1	1711	tags=22%, list=12%, signal=25%
GO_BP_OC_GASTRULATION	GO_BP_OC_GASTRULATION		16	0.517092	1.16221	0.257225	0.730741	1	2474	tags=31%, list=18%, signal=38%
GO_BP_OC_RNA_PROCESSING	GO_BP_OC_RNA_PROCESSING		44	0.414601	1.1603	0.223077	0.730337	1	2960	tags=34%, list=22%, signal=43%
GO_CC_OC_NUCLEAR_SPECK	GO_CC_OC_NUCLEAR_SPECK		35	0.432024	1.15799	0.250922	0.730836	1	2672	tags=31%, list=19%, signal=39%
GO_MF_OC_PHOSPHORIC_DIESTER_HYDROLASE_ACTIVITY	GO_MF_OC_PHOSPHORIC_DIESTER_HYDROLASE_ACTIVITY		40	0.432103	1.1577	0.241245	0.725173	1	2202	tags=40%, list=16%, signal=47%
GO_BP_OC_RESPONSE_TO_VIRUS	GO_BP_OC_RESPONSE_TO_VIRUS		48	0.398066	1.15546	0.179039	0.725764	1	1681	tags=19%, list=12%, signal=21%
GO_BP_OC_REGULATION_OF_TRANSCRIPTION_FROM_RNA_POLYMERASE_II_PROMOTER	GO_BP_OC_REGULATION_OF_TRANSCRIPTION_FROM_RNA_POLYMERASE_II_PROMOTER		123	0.340682	1.14839	0.10084	0.74148	1	2767	tags=31%, list=20%, signal=38%
GO_BP_OC_GLYCOGEN_METABOLIC_PROCESS	GO_BP_OC_GLYCOGEN_METABOLIC_PROCESS		18	0.505319	1.14639	0.281768	0.741127	1	286	tags=33%, list=2%, signal=34%
GO_MF_OC_HISTONE_BINDING	GO_MF_OC_HISTONE_BINDING		32	0.432112	1.13913	0.270758	0.757544	1	4195	tags=59%, list=30%, signal=85%
GO_CC_OC_MITOCHONDRIAL_RESPIRATORY_CHAIN_COMPLEX_I	GO_CC_OC_MITOCHONDRIAL_RESPIRATORY_CHAIN_COMPLEX_I		15	0.516026	1.13901	0.280899	0.751535	1	2896	tags=47%, list=21%, signal=59%
GO_BP_OC_ENDOCRINE_PANCREAS_DEVELOPMENT	GO_BP_OC_ENDOCRINE_PANCREAS_DEVELOPMENT		15	0.527789	1.1371	0.311653	0.750996	1	1825	tags=13%, list=13%, signal=15%
GO_BP_OC_PROTEIN_UBIQUITINATION	GO_BP_OC_PROTEIN_UBIQUITINATION		122	0.341183	1.13472	0.139344	0.752239	1	2231	tags=33%, list=16%, signal=39%
GO_BP_OC_CYTOKINE_PRODUCTION	GO_BP_OC_CYTOKINE_PRODUCTION		16	0.507903	1.1323	0.282051	0.753072	1	285	tags=13%, list=2%, signal=13%
GO_BP_OC_PROTEIN_K48-LINKED_UBIQUITINATION	GO_BP_OC_PROTEIN_K48-LINKED_UBIQUITINATION		24	0.460487	1.12609	0.275	0.767091	1	3564	tags=58%, list=26%, signal=79%
GO_BP_OC_LIPID_TRANSPORT	GO_BP_OC_LIPID_TRANSPORT		23	0.470317	1.12388	0.29097	0.767373	1	1962	tags=35%, list=14%, signal=40%
GO_BP_OC_PEPTIDYL-SERINE_PHOSPHORYLATION	GO_BP_OC_PEPTIDYL-SERINE_PHOSPHORYLATION		41	0.412418	1.12241	0.246753	0.765341	1	2573	tags=49%, list=19%, signal=60%
GO_BP_OC_TRANSCRIPTION_INITIATION_FROM_RNA_POLYMERASE_II_PROMOTER	GO_BP_OC_TRANSCRIPTION_INITIATION_FROM_RNA_POLYMERASE_II_PROMOTER		23	0.466122	1.12189	0.25817	0.760686	1	4085	tags=48%, list=30%, signal=68%
GO_BP_OC_CALCIUM_ION_TRANSPORT	GO_BP_OC_CALCIUM_ION_TRANSPORT		67	0.372236	1.12	0.191489	0.76077	1	2481	tags=28%, list=18%, signal=34%
GO_MF_OC_PHOSPHOPROTEIN_PHOSPHATASE_ACTIVITY	GO_MF_OC_PHOSPHOPROTEIN_PHOSPHATASE_ACTIVITY		64	0.379519	1.11143	0.27451	0.781646	1	1174	tags=27%, list=9%, signal=29%
GO_MF_OC_PROTEIN_TYROSINE_SERINE_THREONINE_PHOSPHATASE_ACTIVITY	GO_MF_OC_PROTEIN_TYROSINE_SERINE_THREONINE_PHOSPHATASE_ACTIVITY		36	0.417646	1.11126	0.258427	0.776005	1	1695	tags=33%, list=12%, signal=38%
GO_MF_OC_P53_BINDING	GO_MF_OC_P53_BINDING		30	0.421827	1.11003	0.275362	0.774226	1	3077	tags=40%, list=22%, signal=51%
GO_BP_OC_CALCIUM_ION_TRANSMEMBRANE_TRANSPORT	GO_BP_OC_CALCIUM_ION_TRANSMEMBRANE_TRANSPORT		38	0.410071	1.10707	0.290566	0.777286	1	2256	tags=32%, list=16%, signal=38%
GO_CC_OC_MEDIATOR_COMPLEX	GO_CC_OC_MEDIATOR_COMPLEX		23	0.455449	1.1027	0.302405	0.78534	1	4358	tags=52%, list=32%, signal=76%
GO_CC_OC_MITOCHONDRIAL_INNER_MEMBRANE	GO_CC_OC_MITOCHONDRIAL_INNER_MEMBRANE		113	0.339663	1.10212	0.205128	0.780963	1	2733	tags=35%, list=20%, signal=44%
GO_BP_OC_POSITIVE_REGULATION_OF_FAT_CELL_DIFFERENTIATION	GO_BP_OC_POSITIVE_REGULATION_OF_FAT_CELL_DIFFERENTIATION		17	0.500958	1.10192	0.33913	0.775737	1	1848	tags=35%, list=13%, signal=41%
GO_BP_OC_HEART_LOOPING	GO_BP_OC_HEART_LOOPING		27	0.427894	1.09762	0.296417	0.783138	1	1058	tags=19%, list=8%, signal=20%
GO_CC_OC_MITOCHONDRIAL_MEMBRANE	GO_CC_OC_MITOCHONDRIAL_MEMBRANE		29	0.432601	1.09513	0.327402	0.784809	1	2481	tags=28%, list=18%, signal=34%
GO_CC_OC_TRANSCRIPTION_FACTOR_COMPLEX	GO_CC_OC_TRANSCRIPTION_FACTOR_COMPLEX		135	0.321543	1.09124	0.189189	0.791396	1	2392	tags=26%, list=17%, signal=31%
GO_CC_OC_ENDOSOME	GO_CC_OC_ENDOSOME		71	0.353864	1.08523	0.271739	0.804316	1	2225	tags=24%, list=16%, signal=28%
GO_MF_OC_CALCIUM_CHANNEL_ACTIVITY	GO_MF_OC_CALCIUM_CHANNEL_ACTIVITY		33	0.40948	1.08131	0.340996	0.810963	1	2256	tags=33%, list=16%, signal=40%
GO_BP_OC_PROTEIN_METHYLATION	GO_BP_OC_PROTEIN_METHYLATION		15	0.491943	1.08096	0.379213	0.806157	1	1806	tags=27%, list=13%, signal=31%
GO_BP_OC_POSITIVE_REGULATION_OF_TRANSCRIPTION_DNA-DEPENDENT	GO_BP_OC_POSITIVE_REGULATION_OF_TRANSCRIPTION_DNA-DEPENDENT		342	0.294227	1.0804	0.0645161	0.801982	1	1848	tags=20%, list=13%, signal=22%
GO_BP_OC_PROTEIN_HOMOOLIGOMERIZATION	GO_BP_OC_PROTEIN_HOMOOLIGOMERIZATION		86	0.335513	1.07991	0.265896	0.797835	1	665	tags=14%, list=5%, signal=15%
GO_BP_OC_POTASSIUM_ION_TRANSPORT	GO_BP_OC_POTASSIUM_ION_TRANSPORT		76	0.341425	1.07899	0.280423	0.794604	1	1746	tags=16%, list=13%, signal=18%
GO_MF_OC_RNA_POLYMERASE_II_ACTIVATING_TRANSCRIPTION_FACTOR_BINDING	GO_MF_OC_RNA_POLYMERASE_II_ACTIVATING_TRANSCRIPTION_FACTOR_BINDING		16	0.479781	1.07766	0.319149	0.793139	1	3739	tags=63%, list=27%, signal=86%
GO_BP_OC_REGULATION_OF_MEMBRANE_POTENTIAL	GO_BP_OC_REGULATION_OF_MEMBRANE_POTENTIAL		30	0.414432	1.07592	0.31769	0.793078	1	1922	tags=30%, list=14%, signal=35%
GO_BP_OC_RESPONSE_TO_IONIZING_RADIATION	GO_BP_OC_RESPONSE_TO_IONIZING_RADIATION		20	0.467698	1.07464	0.339623	0.791845	1	3813	tags=45%, list=28%, signal=62%
GO_BP_OC_MYELINATION	GO_BP_OC_MYELINATION		18	0.466751	1.07422	0.342508	0.787598	1	1617	tags=33%, list=12%, signal=38%
GO_CC_OC_PML_BODY	GO_CC_OC_PML_BODY		32	0.415812	1.06916	0.364312	0.797462	1	1431	tags=28%, list=10%, signal=31%
GO_BP_OC_RESPONSE_TO_CALCIUM_ION	GO_BP_OC_RESPONSE_TO_CALCIUM_ION		22	0.439618	1.06645	0.337662	0.800693	1	1746	tags=23%, list=13%, signal=26%
GO_MF_OC_E-BOX_BINDING	GO_MF_OC_E-BOX_BINDING		15	0.490282	1.06116	0.40413	0.812335	1	1928	tags=47%, list=14%, signal=54%
GO_BP_OC_POSITIVE_REGULATION_OF_TRANSCRIPTION_FROM_RNA_POLYMERASE_II_PROMOTER	GO_BP_OC_POSITIVE_REGULATION_OF_TRANSCRIPTION_FROM_RNA_POLYMERASE_II_PROMOTER		433	0.281753	1.06098	0.214286	0.807518	1	1800	tags=21%, list=13%, signal=23%
GO_BP_OC_NUCLEOSOME_ASSEMBLY	GO_BP_OC_NUCLEOSOME_ASSEMBLY		42	0.380912	1.05737	0.350394	0.813566	1	1844	tags=24%, list=13%, signal=27%
GO_BP_OC_POSITIVE_REGULATION_OF_MAP_KINASE_ACTIVITY	GO_BP_OC_POSITIVE_REGULATION_OF_MAP_KINASE_ACTIVITY		23	0.438308	1.0573	0.378738	0.808393	1	1594	tags=22%, list=12%, signal=25%
GO_BP_OC_POSITIVE_REGULATION_OF_PHOSPHATIDYLINOSITOL_3-KINASE_CASCADE	GO_BP_OC_POSITIVE_REGULATION_OF_PHOSPHATIDYLINOSITOL_3-KINASE_CASCADE		28	0.419919	1.05671	0.37931	0.804878	1	1747	tags=39%, list=13%, signal=45%
GO_MF_OC_POTASSIUM_CHANNEL_ACTIVITY	GO_MF_OC_POTASSIUM_CHANNEL_ACTIVITY		42	0.386369	1.05352	0.342857	0.809728	1	665	tags=12%, list=5%, signal=12%
GO_CC_OC_HETEROCHROMATIN	GO_CC_OC_HETEROCHROMATIN		17	0.465189	1.05233	0.362069	0.808046	1	1673	tags=24%, list=12%, signal=27%
GO_MF_OC_HISTONE_DEACETYLASE_BINDING	GO_MF_OC_HISTONE_DEACETYLASE_BINDING		47	0.372977	1.05134	0.348739	0.805907	1	2307	tags=32%, list=17%, signal=38%
GO_CC_OC_MICROSOME	GO_CC_OC_MICROSOME		78	0.339256	1.05115	0.302632	0.801441	1	1721	tags=35%, list=13%, signal=39%
GO_MF_OC_UBIQUITIN_PROTEIN_LIGASE_BINDING	GO_MF_OC_UBIQUITIN_PROTEIN_LIGASE_BINDING		89	0.331549	1.05053	0.321678	0.798013	1	3398	tags=42%, list=25%, signal=55%
GO_BP_OC_FATTY_ACID_METABOLIC_PROCESS	GO_BP_OC_FATTY_ACID_METABOLIC_PROCESS		17	0.456711	1.0505	0.373134	0.79305	1	3132	tags=53%, list=23%, signal=68%
GO_CC_OC_CAVEOLA	GO_CC_OC_CAVEOLA		27	0.415311	1.04872	0.355705	0.793702	1	2694	tags=37%, list=20%, signal=46%
GO_BP_OC_RESPONSE_TO_OXIDATIVE_STRESS	GO_BP_OC_RESPONSE_TO_OXIDATIVE_STRESS		52	0.36173	1.04707	0.325	0.794009	1	1901	tags=31%, list=14%, signal=36%
GO_BP_OC_LACTATION	GO_BP_OC_LACTATION		18	0.45955	1.04539	0.34891	0.793909	1	1117	tags=39%, list=8%, signal=42%
GO_BP_OC_NEGATIVE_REGULATION_OF_TRANSCRIPTION_FROM_RNA_POLYMERASE_II_PROMOTER	GO_BP_OC_NEGATIVE_REGULATION_OF_TRANSCRIPTION_FROM_RNA_POLYMERASE_II_PROMOTER		293	0.28174	1.04423	0.208333	0.792702	1	2396	tags=26%, list=17%, signal=31%
GO_BP_OC_OVARIAN_FOLLICLE_DEVELOPMENT	GO_BP_OC_OVARIAN_FOLLICLE_DEVELOPMENT		18	0.45889	1.0439	0.385757	0.788777	1	928	tags=17%, list=7%, signal=18%
GO_BP_OC_RESPONSE_TO_INSULIN_STIMULUS	GO_BP_OC_RESPONSE_TO_INSULIN_STIMULUS		16	0.45681	1.04179	0.378882	0.790262	1	1373	tags=31%, list=10%, signal=35%
GO_CC_OC_CENTROSOME	GO_CC_OC_CENTROSOME		231	0.29332	1.04178	0.346939	0.78548	1	2149	tags=23%, list=16%, signal=27%
GO_BP_OC_RECEPTOR-MEDIATED_ENDOCYTOSIS	GO_BP_OC_RECEPTOR-MEDIATED_ENDOCYTOSIS		15	0.477892	1.04165	0.403361	0.781134	1	2938	tags=33%, list=21%, signal=42%
GO_MF_OC_NAD_BINDING1	GO_MF_OC_NAD_BINDING1		26	0.412684	1.04033	0.389408	0.780234	1	1717	tags=23%, list=12%, signal=26%
GO_BP_OC_POSITIVE_REGULATION_OF_PEPTIDYL-SERINE_PHOSPHORYLATION	GO_BP_OC_POSITIVE_REGULATION_OF_PEPTIDYL-SERINE_PHOSPHORYLATION		28	0.40793	1.04	0.39	0.776575	1	1848	tags=36%, list=13%, signal=41%
GO_MF_OC_TRANSCRIPTION_FACTOR_BINDING	GO_MF_OC_TRANSCRIPTION_FACTOR_BINDING		130	0.311673	1.03983	0.313131	0.772608	1	2626	tags=29%, list=19%, signal=36%
GO_CC_OC_MEMBRANE_FRACTION	GO_CC_OC_MEMBRANE_FRACTION		163	0.295449	1.03787	0.278481	0.773645	1	1789	tags=19%, list=13%, signal=22%
GO_CC_OC_PCG_PROTEIN_COMPLEX	GO_CC_OC_PCG_PROTEIN_COMPLEX		18	0.464861	1.03783	0.395498	0.769223	1	1158	tags=17%, list=8%, signal=18%
GO_BP_OC_POSITIVE_REGULATION_OF_PROTEIN_PHOSPHORYLATION	GO_BP_OC_POSITIVE_REGULATION_OF_PROTEIN_PHOSPHORYLATION		50	0.355871	1.03553	0.354331	0.771352	1	1901	tags=26%, list=14%, signal=30%
GO_BP_OC_POTASSIUM_ION_TRANSMEMBRANE_TRANSPORT	GO_BP_OC_POTASSIUM_ION_TRANSMEMBRANE_TRANSPORT		45	0.371257	1.03333	0.373333	0.773356	1	665	tags=11%, list=5%, signal=12%
GO_CC_OC_PROTEASOME_COMPLEX	GO_CC_OC_PROTEASOME_COMPLEX		26	0.417759	1.0276	0.418685	0.785491	1	2800	tags=35%, list=20%, signal=43%
GO_MF_OC_PROTEIN_HETERODIMERIZATION_ACTIVITY	GO_MF_OC_PROTEIN_HETERODIMERIZATION_ACTIVITY		157	0.298654	1.02747	0.361446	0.78147	1	1977	tags=23%, list=14%, signal=26%
GO_BP_OC_BMP_SIGNALING_PATHWAY	GO_BP_OC_BMP_SIGNALING_PATHWAY		28	0.401627	1.0232	0.431734	0.789233	1	704	tags=18%, list=5%, signal=19%
GO_BP_OC_POSITIVE_REGULATION_OF_GENE_EXPRESSION	GO_BP_OC_POSITIVE_REGULATION_OF_GENE_EXPRESSION		96	0.317596	1.01598	0.387755	0.80575	1	1617	tags=19%, list=12%, signal=21%
GO_MF_OC_TRANSMEMBRANE_SIGNALING_RECEPTOR_ACTIVITY	GO_MF_OC_TRANSMEMBRANE_SIGNALING_RECEPTOR_ACTIVITY		61	0.339448	1.01574	0.365	0.801973	1	950	tags=11%, list=7%, signal=12%
GO_BP_OC_FAT_CELL_DIFFERENTIATION	GO_BP_OC_FAT_CELL_DIFFERENTIATION		32	0.374644	1.01463	0.429577	0.80089	1	3616	tags=50%, list=26%, signal=68%
GO_BP_OC_MRNA_EXPORT_FROM_NUCLEUS	GO_BP_OC_MRNA_EXPORT_FROM_NUCLEUS		15	0.456593	1.01417	0.420749	0.797718	1	4203	tags=40%, list=31%, signal=58%
GO_MF_OC_MAGNESIUM_ION_BINDING	GO_MF_OC_MAGNESIUM_ION_BINDING		117	0.311701	1.01139	0.376923	0.801471	1	1620	tags=21%, list=12%, signal=23%
GO_MF_OC_DRUG_BINDING	GO_MF_OC_DRUG_BINDING		17	0.437331	1.01131	0.448485	0.79725	1	1330	tags=29%, list=10%, signal=33%
GO_BP_OC_PHOSPHATIDYLINOSITOL_PHOSPHORYLATION	GO_BP_OC_PHOSPHATIDYLINOSITOL_PHOSPHORYLATION		31	0.390475	1.01117	0.405498	0.793223	1	2981	tags=39%, list=22%, signal=49%
GO_BP_OC_CELLULAR_PROTEIN_METABOLIC_PROCESS	GO_BP_OC_CELLULAR_PROTEIN_METABOLIC_PROCESS		19	0.439552	1.0109	0.432343	0.789785	1	4230	tags=58%, list=31%, signal=83%
GO_BP_OC_POSITIVE_REGULATION_OF_NF-KAPPAB_TRANSCRIPTION_FACTOR_ACTIVITY	GO_BP_OC_POSITIVE_REGULATION_OF_NF-KAPPAB_TRANSCRIPTION_FACTOR_ACTIVITY		56	0.346237	1.01049	0.418605	0.786899	1	1707	tags=23%, list=12%, signal=26%
GO_BP_OC_PROTEIN_POLYMERIZATION	GO_BP_OC_PROTEIN_POLYMERIZATION		18	0.451464	1.01043	0.450617	0.782838	1	1146	tags=17%, list=8%, signal=18%
GO_MF_OC_PROTEIN_SERINE_THREONINE_KINASE_ACTIVITY	GO_MF_OC_PROTEIN_SERINE_THREONINE_KINASE_ACTIVITY		273	0.280538	1.00969	0.388889	0.780747	1	2584	tags=32%, list=19%, signal=39%
GO_BP_OC_DNA_DAMAGE_CHECKPOINT	GO_BP_OC_DNA_DAMAGE_CHECKPOINT		16	0.456703	1.00927	0.429825	0.777794	1	2290	tags=38%, list=17%, signal=45%
GO_MF_OC_LIGAND-DEPENDENT_NUCLEAR_RECEPTOR_TRANSCRIPTION_COACTIVATOR_ACTIVITY	GO_MF_OC_LIGAND-DEPENDENT_NUCLEAR_RECEPTOR_TRANSCRIPTION_COACTIVATOR_ACTIVITY		24	0.407456	1.00903	0.455516	0.774297	1	1208	tags=17%, list=9%, signal=18%
GO_BP_OC_RESPONSE_TO_DNA_DAMAGE_STIMULUS	GO_BP_OC_RESPONSE_TO_DNA_DAMAGE_STIMULUS		96	0.316735	1.00709	0.390977	0.775576	1	2047	tags=24%, list=15%, signal=28%
GO_BP_OC_POSITIVE_REGULATION_OF_OSTEOBLAST_DIFFERENTIATION	GO_BP_OC_POSITIVE_REGULATION_OF_OSTEOBLAST_DIFFERENTIATION		30	0.395136	1.00646	0.410774	0.773317	1	1665	tags=27%, list=12%, signal=30%
GO_BP_OC_EMBRYONIC_SKELETAL_SYSTEM_MORPHOGENESIS	GO_BP_OC_EMBRYONIC_SKELETAL_SYSTEM_MORPHOGENESIS		38	0.367971	1.00565	0.418919	0.771438	1	1354	tags=18%, list=10%, signal=20%
GO_BP_OC_CELL_DIFFERENTIATION	GO_BP_OC_CELL_DIFFERENTIATION		77	0.326705	1.00456	0.462428	0.7706	1	1053	tags=9%, list=8%, signal=10%
GO_MF_OC_PHOSPHOTRANSFERASE_ACTIVITY_ALCOHOL_GROUP_AS_ACCEPTOR	GO_MF_OC_PHOSPHOTRANSFERASE_ACTIVITY_ALCOHOL_GROUP_AS_ACCEPTOR		44	0.355243	1.00003	0.452381	0.779813	1	3056	tags=34%, list=22%, signal=44%
GO_CC_OC_NUCLEOSOME	GO_CC_OC_NUCLEOSOME		28	0.380801	0.995098	0.474048	0.789552	1	1844	tags=25%, list=13%, signal=29%
GO_CC_OC_Z_DISC	GO_CC_OC_Z_DISC		32	0.384329	0.9949	0.429043	0.786089	1	1316	tags=34%, list=10%, signal=38%
GO_CC_OC_EXTRINSIC_TO_MEMBRANE	GO_CC_OC_EXTRINSIC_TO_MEMBRANE		16	0.449643	0.994811	0.441341	0.782316	1	132	tags=13%, list=1%, signal=13%
GO_BP_OC_RIBOSOME_BIOGENESIS	GO_BP_OC_RIBOSOME_BIOGENESIS		16	0.449339	0.994501	0.463855	0.779111	1	3601	tags=56%, list=26%, signal=76%
GO_BP_OC_CELLULAR_CALCIUM_ION_HOMEOSTASIS	GO_BP_OC_CELLULAR_CALCIUM_ION_HOMEOSTASIS		32	0.377756	0.993422	0.467925	0.778187	1	1462	tags=19%, list=11%, signal=21%
GO_BP_OC_GOLGI_ORGANIZATION	GO_BP_OC_GOLGI_ORGANIZATION		20	0.422839	0.989626	0.445483	0.784831	1	2648	tags=35%, list=19%, signal=43%
GO_BP_OC_BRANCHING_INVOLVED_IN_URETERIC_BUD_MORPHOGENESIS	GO_BP_OC_BRANCHING_INVOLVED_IN_URETERIC_BUD_MORPHOGENESIS		34	0.377545	0.987006	0.455556	0.788239	1	1624	tags=15%, list=12%, signal=17%
GO_BP_OC_HISTONE_ACETYLATION	GO_BP_OC_HISTONE_ACETYLATION		16	0.442788	0.986209	0.445428	0.786586	1	3823	tags=63%, list=28%, signal=86%
GO_BP_OC_RECEPTOR_INTERNALIZATION	GO_BP_OC_RECEPTOR_INTERNALIZATION		15	0.458785	0.982742	0.463687	0.792377	1	619	tags=20%, list=4%, signal=21%
GO_CC_OC_NUCLEOPLASM	GO_CC_OC_NUCLEOPLASM		77	0.319873	0.977251	0.563291	0.80423	1	3399	tags=44%, list=25%, signal=58%
GO_BP_OC_BLOOD_VESSEL_MORPHOGENESIS	GO_BP_OC_BLOOD_VESSEL_MORPHOGENESIS		18	0.440258	0.976813	0.493789	0.8015	1	1186	tags=17%, list=9%, signal=18%
GO_CC_OC_NUCLEAR_CHROMATIN	GO_CC_OC_NUCLEAR_CHROMATIN		47	0.352573	0.974308	0.493151	0.804572	1	3826	tags=38%, list=28%, signal=53%
GO_MF_OC_HISTONE_ACETYLTRANSFERASE_ACTIVITY	GO_MF_OC_HISTONE_ACETYLTRANSFERASE_ACTIVITY		26	0.393614	0.973083	0.509363	0.804174	1	3823	tags=50%, list=28%, signal=69%
GO_BP_OC_CANONICAL_WNT_RECEPTOR_SIGNALING_PATHWAY	GO_BP_OC_CANONICAL_WNT_RECEPTOR_SIGNALING_PATHWAY		42	0.358265	0.971012	0.45679	0.806153	1	1825	tags=26%, list=13%, signal=30%
GO_BP_OC_GLYCOLYSIS	GO_BP_OC_GLYCOLYSIS		29	0.383753	0.969891	0.475083	0.80545	1	1341	tags=14%, list=10%, signal=15%
GO_MF_OC_ATP-DEPENDENT_HELICASE_ACTIVITY	GO_MF_OC_ATP-DEPENDENT_HELICASE_ACTIVITY		68	0.314856	0.968774	0.522727	0.805006	1	3434	tags=28%, list=25%, signal=37%
GO_BP_OC_ENDOSOME_TO_LYSOSOME_TRANSPORT	GO_BP_OC_ENDOSOME_TO_LYSOSOME_TRANSPORT		15	0.443923	0.966988	0.507553	0.806168	1	3070	tags=40%, list=22%, signal=51%
GO_MF_OC_RNA_POLYMERASE_II_CORE_PROMOTER_PROXIMAL_REGION_SEQUENCE-SPECIFIC_DNA_BINDING_FACTNEGATIVE	GO_MF_OC_RNA_POLYMERASE_II_CORE_PROMOTER_PROXIMAL_REGION_SEQUENCE-SPECIFIC_DNA_BINDING_FACTNEGATIVE		22	0.396909	0.966711	0.47546	0.803082	1	1711	tags=32%, list=12%, signal=36%
GO_BP_OC_SMOOTHENED_SIGNALING_PATHWAY	GO_BP_OC_SMOOTHENED_SIGNALING_PATHWAY		37	0.349583	0.964505	0.520147	0.805178	1	3041	tags=35%, list=22%, signal=45%
GO_BP_OC_CELL_MORPHOGENESIS	GO_BP_OC_CELL_MORPHOGENESIS		42	0.348035	0.963989	0.478102	0.802718	1	1744	tags=26%, list=13%, signal=30%
GO_BP_OC_PEPTIDYL-TYROSINE_DEPHOSPHORYLATION	GO_BP_OC_PEPTIDYL-TYROSINE_DEPHOSPHORYLATION		73	0.308644	0.962501	0.517045	0.803274	1	1292	tags=21%, list=9%, signal=23%
GO_CC_OC_CHROMATIN	GO_CC_OC_CHROMATIN		39	0.363366	0.960298	0.497959	0.805936	1	3370	tags=49%, list=24%, signal=64%
GO_BP_OC_ACTIN_CYTOSKELETON_ORGANIZATION	GO_BP_OC_ACTIN_CYTOSKELETON_ORGANIZATION		67	0.314775	0.958762	0.543269	0.806273	1	1115	tags=16%, list=8%, signal=18%
GO_MF_OC_TRANSCRIPTION_COFACTOR_ACTIVITY	GO_MF_OC_TRANSCRIPTION_COFACTOR_ACTIVITY		20	0.404528	0.958437	0.515723	0.803541	1	3893	tags=50%, list=28%, signal=70%
GO_MF_OC_FRIZZLED_BINDING	GO_MF_OC_FRIZZLED_BINDING		15	0.43743	0.955631	0.516717	0.807479	1	798	tags=20%, list=6%, signal=21%
GO_BP_OC_SYNAPTIC_TRANSMISSION	GO_BP_OC_SYNAPTIC_TRANSMISSION		43	0.341009	0.955036	0.545024	0.805365	1	2613	tags=26%, list=19%, signal=31%
GO_BP_OC_POSITIVE_REGULATION_OF_B_CELL_PROLIFERATION	GO_BP_OC_POSITIVE_REGULATION_OF_B_CELL_PROLIFERATION		22	0.395255	0.95446	0.510972	0.80344	1	1730	tags=27%, list=13%, signal=31%
GO_BP_OC_NERVOUS_SYSTEM_DEVELOPMENT	GO_BP_OC_NERVOUS_SYSTEM_DEVELOPMENT		61	0.319429	0.952511	0.548673	0.805174	1	1389	tags=15%, list=10%, signal=16%
GO_BP_OC_DEPHOSPHORYLATION	GO_BP_OC_DEPHOSPHORYLATION		89	0.298676	0.952338	0.5625	0.802059	1	1174	tags=19%, list=9%, signal=21%
GO_BP_OC_T_CELL_DIFFERENTIATION	GO_BP_OC_T_CELL_DIFFERENTIATION		19	0.411369	0.942385	0.514706	0.825101	1	2338	tags=32%, list=17%, signal=38%
GO_MF_OC_PROTEIN_TYROSINE_PHOSPHATASE_ACTIVITY	GO_MF_OC_PROTEIN_TYROSINE_PHOSPHATASE_ACTIVITY		73	0.307243	0.939469	0.581522	0.829376	1	1447	tags=22%, list=11%, signal=24%
GO_BP_OC_FOREBRAIN_DEVELOPMENT	GO_BP_OC_FOREBRAIN_DEVELOPMENT		56	0.320441	0.938125	0.584541	0.829413	1	1092	tags=9%, list=8%, signal=10%
GO_MF_OC_HYDROLASE_ACTIVITY_ACTING_ON_ACID_ANHYDRIDES_IN_PHOSPHORUS-CONTAINING_ANHYDRIDES	GO_MF_OC_HYDROLASE_ACTIVITY_ACTING_ON_ACID_ANHYDRIDES_IN_PHOSPHORUS-CONTAINING_ANHYDRIDES		15	0.414924	0.933571	0.522013	0.838314	1	2904	tags=27%, list=21%, signal=34%
GO_MF_OC_TRANSCRIPTION_COREPRESSOR_ACTIVITY	GO_MF_OC_TRANSCRIPTION_COREPRESSOR_ACTIVITY		72	0.302998	0.930434	0.59596	0.843376	1	2670	tags=28%, list=19%, signal=34%
GO_CC_OC_CORTICAL_CYTOSKELETON	GO_CC_OC_CORTICAL_CYTOSKELETON		19	0.398013	0.926153	0.561194	0.85143	1	760	tags=21%, list=6%, signal=22%
GO_BP_OC_CELLULAR_AMINO_ACID_METABOLIC_PROCESS	GO_BP_OC_CELLULAR_AMINO_ACID_METABOLIC_PROCESS		18	0.3912	0.923971	0.551155	0.853669	1	1253	tags=17%, list=9%, signal=18%
GO_MF_OC_CYTOKINE_RECEPTOR_ACTIVITY	GO_MF_OC_CYTOKINE_RECEPTOR_ACTIVITY		20	0.395654	0.922736	0.553125	0.853335	1	200	tags=15%, list=1%, signal=15%
GO_BP_OC_OUTFLOW_TRACT_MORPHOGENESIS	GO_BP_OC_OUTFLOW_TRACT_MORPHOGENESIS		25	0.381384	0.92156	0.624183	0.852908	1	2197	tags=32%, list=16%, signal=38%
GO_BP_OC_POSITIVE_REGULATION_OF_CATALYTIC_ACTIVITY	GO_BP_OC_POSITIVE_REGULATION_OF_CATALYTIC_ACTIVITY		22	0.380662	0.921345	0.564263	0.849916	1	403	tags=14%, list=3%, signal=14%
GO_BP_OC_HEART_DEVELOPMENT	GO_BP_OC_HEART_DEVELOPMENT		121	0.279535	0.918964	0.746154	0.852893	1	1828	tags=23%, list=13%, signal=26%
GO_MF_OC_RNA_POLYMERASE_II_DISTAL_ENHANCER_SEQUENCE-SPECIFIC_DNA_BINDING_TRANSCRIPTION_FACTOR_ACTIVITY	GO_MF_OC_RNA_POLYMERASE_II_DISTAL_ENHANCER_SEQUENCE-SPECIFIC_DNA_BINDING_TRANSCRIPTION_FACTOR_ACTIVITY		29	0.361254	0.918168	0.590406	0.851344	1	1058	tags=10%, list=8%, signal=11%
GO_BP_OC_BASE-EXCISION_REPAIR	GO_BP_OC_BASE-EXCISION_REPAIR		15	0.420483	0.915685	0.556474	0.854313	1	1960	tags=33%, list=14%, signal=39%
GO_BP_OC_PROTEIN_LOCALIZATION	GO_BP_OC_PROTEIN_LOCALIZATION		46	0.325816	0.913146	0.620833	0.857651	1	1906	tags=26%, list=14%, signal=30%
GO_BP_OC_POSITIVE_REGULATION_OF_PHOSPHORYLATION	GO_BP_OC_POSITIVE_REGULATION_OF_PHOSPHORYLATION		17	0.411914	0.910349	0.616477	0.861043	1	1208	tags=29%, list=9%, signal=32%
GO_MF_OC_TRANSFERASE_ACTIVITY_TRANSFERRING_ACYL_GROUPS_OTHER_THAN_AMINO-ACYL_GROUPS	GO_MF_OC_TRANSFERASE_ACTIVITY_TRANSFERRING_ACYL_GROUPS_OTHER_THAN_AMINO-ACYL_GROUPS		17	0.396537	0.908728	0.556231	0.861746	1	1041	tags=18%, list=8%, signal=19%
GO_BP_OC_PROTEIN_FOLDING	GO_BP_OC_PROTEIN_FOLDING		85	0.286398	0.9075	0.718919	0.861502	1	2460	tags=25%, list=18%, signal=30%
GO_BP_OC_NEURAL_TUBE_CLOSURE	GO_BP_OC_NEURAL_TUBE_CLOSURE		49	0.320253	0.905349	0.634783	0.863564	1	2299	tags=24%, list=17%, signal=29%
GO_BP_OC_NEGATIVE_REGULATION_OF_TRANSCRIPTION_DNA-DEPENDENT	GO_BP_OC_NEGATIVE_REGULATION_OF_TRANSCRIPTION_DNA-DEPENDENT		268	0.24532	0.899656	0.877551	0.875352	1	1884	tags=19%, list=14%, signal=22%
GO_BP_OC_LOCOMOTORY_BEHAVIOR	GO_BP_OC_LOCOMOTORY_BEHAVIOR		44	0.32145	0.899008	0.638889	0.873426	1	2197	tags=23%, list=16%, signal=27%
GO_BP_OC_KIDNEY_DEVELOPMENT	GO_BP_OC_KIDNEY_DEVELOPMENT		60	0.310841	0.894959	0.618557	0.880477	1	1373	tags=17%, list=10%, signal=18%
GO_MF_OC_OXIDOREDUCTASE_PAIRED_DONORS_REDUCTION_OXYGEN_2-OXOGLUTARATE_ONE_DONATOM_OXYGEN_BOTH_DONORS	GO_MF_OC_OXIDOREDUCTASE_PAIRED_DONORS_REDUCTION_OXYGEN_2-OXOGLUTARATE_ONE_DONATOM_OXYGEN_BOTH_DONORS		25	0.3672	0.894935	0.590625	0.876984	1	1286	tags=24%, list=9%, signal=26%
GO_BP_OC_CELL_CYCLE_ARREST	GO_BP_OC_CELL_CYCLE_ARREST		48	0.316533	0.888044	0.682465	0.891305	1	1625	tags=25%, list=12%, signal=28%
GO_BP_OC_SPERM_MOTILITY	GO_BP_OC_SPERM_MOTILITY		17	0.396252	0.887788	0.59593	0.888267	1	509	tags=6%, list=4%, signal=6%
GO_MF_OC_SYMPORTER_ACTIVITY	GO_MF_OC_SYMPORTER_ACTIVITY		19	0.378224	0.884816	0.62215	0.892603	1	1275	tags=11%, list=9%, signal=12%
GO_BP_OC_BLOOD_VESSEL_REMODELING	GO_BP_OC_BLOOD_VESSEL_REMODELING		20	0.384941	0.884129	0.61859	0.890708	1	1058	tags=15%, list=8%, signal=16%
GO_MF_OC_MANGANESE_ION_BINDING	GO_MF_OC_MANGANESE_ION_BINDING		25	0.351677	0.884063	0.638158	0.887306	1	1046	tags=24%, list=8%, signal=26%
GO_BP_OC_POSITIVE_REGULATION_OF_MESENCHYMAL_CELL_PROLIFERATION	GO_BP_OC_POSITIVE_REGULATION_OF_MESENCHYMAL_CELL_PROLIFERATION		24	0.367135	0.883442	0.652027	0.885456	1	1054	tags=25%, list=8%, signal=27%
GO_BP_OC_AXONOGENESIS	GO_BP_OC_AXONOGENESIS		48	0.312131	0.882437	0.666667	0.884399	1	1349	tags=23%, list=10%, signal=25%
GO_CC_OC_PROTEIN_COMPLEX	GO_CC_OC_PROTEIN_COMPLEX		105	0.269363	0.878586	0.773723	0.891011	1	1973	tags=21%, list=14%, signal=24%
GO_BP_OC_ORGAN_MORPHOGENESIS	GO_BP_OC_ORGAN_MORPHOGENESIS		55	0.306595	0.878298	0.685106	0.888294	1	1715	tags=20%, list=12%, signal=23%
GO_MF_OC_GLYCOPROTEIN_BINDING	GO_MF_OC_GLYCOPROTEIN_BINDING		22	0.373028	0.877313	0.64214	0.887161	1	764	tags=23%, list=6%, signal=24%
GO_MF_OC_PROTEIN_TRANSPORTER_ACTIVITY	GO_MF_OC_PROTEIN_TRANSPORTER_ACTIVITY		47	0.305296	0.871847	0.694215	0.896611	1	2059	tags=36%, list=15%, signal=42%
GO_BP_OC_ENDOCYTOSIS	GO_BP_OC_ENDOCYTOSIS		29	0.336956	0.869701	0.684564	0.898271	1	1095	tags=17%, list=8%, signal=19%
GO_BP_OC_MAMMARY_GLAND_DEVELOPMENT	GO_BP_OC_MAMMARY_GLAND_DEVELOPMENT		25	0.349693	0.865807	0.686747	0.904079	1	3387	tags=32%, list=25%, signal=42%
GO_BP_OC_DNA_RECOMBINATION	GO_BP_OC_DNA_RECOMBINATION		21	0.366605	0.865433	0.628931	0.901499	1	3632	tags=38%, list=26%, signal=52%
GO_MF_OC_CHEMOKINE_ACTIVITY	GO_MF_OC_CHEMOKINE_ACTIVITY		16	0.397469	0.863489	0.653846	0.902619	1	670	tags=13%, list=5%, signal=13%
GO_BP_OC_ADENYLATE_CYCLASE-ACTIVATING_G-PROTEIN_COUPLED_RECEPTOR_SIGNALING_PATHWAY	GO_BP_OC_ADENYLATE_CYCLASE-ACTIVATING_G-PROTEIN_COUPLED_RECEPTOR_SIGNALING_PATHWAY		19	0.368963	0.860107	0.655977	0.907235	1	1770	tags=26%, list=13%, signal=30%
GO_MF_OC_CYSTEINE-TYPE_PEPTIDASE_ACTIVITY	GO_MF_OC_CYSTEINE-TYPE_PEPTIDASE_ACTIVITY		69	0.290778	0.856557	0.797688	0.912174	1	2395	tags=33%, list=17%, signal=40%
GO_MF_OC_PROTEIN_COMPLEX_BINDING	GO_MF_OC_PROTEIN_COMPLEX_BINDING		24	0.353249	0.855296	0.643599	0.911672	1	3455	tags=54%, list=25%, signal=72%
GO_BP_OC_POSITIVE_REGULATION_OF_CYTOKINE_SECRETION	GO_BP_OC_POSITIVE_REGULATION_OF_CYTOKINE_SECRETION		18	0.361739	0.85468	0.642077	0.909631	1	1776	tags=33%, list=13%, signal=38%
GO_BP_OC_POSITIVE_REGULATION_OF_BMP_SIGNALING_PATHWAY	GO_BP_OC_POSITIVE_REGULATION_OF_BMP_SIGNALING_PATHWAY		15	0.390733	0.85369	0.672515	0.908562	1	442	tags=13%, list=3%, signal=14%
GO_BP_OC_CELLULAR_RESPONSE_TO_UV	GO_BP_OC_CELLULAR_RESPONSE_TO_UV		15	0.393771	0.852572	0.655353	0.907816	1	2290	tags=33%, list=17%, signal=40%
GO_MF_OC_RNA_POLYMERASE_II_CORE_PROMOTER_PROXIMAL_REGION_SEQUENCE-SPECIFIC_DNA_BINDING_FACTPOSITIVE	GO_MF_OC_RNA_POLYMERASE_II_CORE_PROMOTER_PROXIMAL_REGION_SEQUENCE-SPECIFIC_DNA_BINDING_FACTPOSITIVE		40	0.313468	0.851983	0.695279	0.905835	1	1825	tags=23%, list=13%, signal=26%
GO_BP_OC_HEART_MORPHOGENESIS	GO_BP_OC_HEART_MORPHOGENESIS		23	0.351031	0.85172	0.680782	0.903088	1	3014	tags=52%, list=22%, signal=67%
GO_BP_OC_PLACENTA_DEVELOPMENT	GO_BP_OC_PLACENTA_DEVELOPMENT		17	0.384207	0.849201	0.664634	0.905528	1	1187	tags=24%, list=9%, signal=26%
GO_BP_OC_NEGATIVE_REGULATION_OF_DNA_BINDING	GO_BP_OC_NEGATIVE_REGULATION_OF_DNA_BINDING		15	0.390708	0.848337	0.651163	0.90421	1	1837	tags=40%, list=13%, signal=46%
GO_CC_OC_NUCLEOLUS	GO_CC_OC_NUCLEOLUS		283	0.232366	0.846822	1	0.904275	1	3556	tags=35%, list=26%, signal=46%
GO_BP_OC_PROTEIN_COMPLEX_ASSEMBLY	GO_BP_OC_PROTEIN_COMPLEX_ASSEMBLY		25	0.344879	0.842389	0.685535	0.910818	1	1180	tags=20%, list=9%, signal=22%
GO_CC_OC_RIBONUCLEOPROTEIN_COMPLEX	GO_CC_OC_RIBONUCLEOPROTEIN_COMPLEX		82	0.266576	0.837653	0.888889	0.917934	1	3182	tags=30%, list=23%, signal=39%
GO_BP_OC_REGULATION_OF_GENE_EXPRESSION	GO_BP_OC_REGULATION_OF_GENE_EXPRESSION		58	0.282314	0.837497	0.794872	0.914906	1	2127	tags=22%, list=15%, signal=26%
GO_BP_OC_HISTONE_H3_ACETYLATION	GO_BP_OC_HISTONE_H3_ACETYLATION		28	0.332265	0.836808	0.726962	0.913062	1	3493	tags=32%, list=25%, signal=43%
GO_BP_OC_EPITHELIAL_TO_MESENCHYMAL_TRANSITION	GO_BP_OC_EPITHELIAL_TO_MESENCHYMAL_TRANSITION		16	0.379152	0.826902	0.743662	0.931168	1	704	tags=19%, list=5%, signal=20%
GO_CC_OC_POSTSYNAPTIC_DENSITY	GO_CC_OC_POSTSYNAPTIC_DENSITY		22	0.336285	0.826093	0.724036	0.929521	1	3634	tags=45%, list=26%, signal=62%
GO_CC_OC_NEURON_PROJECTION	GO_CC_OC_NEURON_PROJECTION		41	0.29826	0.823138	0.787234	0.932532	1	1096	tags=12%, list=8%, signal=13%
GO_MF_OC_LIGASE_ACTIVITY	GO_MF_OC_LIGASE_ACTIVITY		57	0.282293	0.817318	0.833333	0.941091	1	3443	tags=39%, list=25%, signal=51%
GO_BP_OC_REGULATION_OF_PROTEIN_LOCALIZATION	GO_BP_OC_REGULATION_OF_PROTEIN_LOCALIZATION		20	0.348422	0.816509	0.735465	0.93953	1	1807	tags=20%, list=13%, signal=23%
GO_BP_OC_NEGATIVE_REGULATION_OF_TRANSFORMING_GROWTH_FACTOR_BETA_RECEPTOR_SIGNALING_PATHWAY	GO_BP_OC_NEGATIVE_REGULATION_OF_TRANSFORMING_GROWTH_FACTOR_BETA_RECEPTOR_SIGNALING_PATHWAY		21	0.345948	0.815579	0.755952	0.938007	1	1179	tags=14%, list=9%, signal=16%
GO_CC_OC_NUCLEAR_MEMBRANE	GO_CC_OC_NUCLEAR_MEMBRANE		52	0.288022	0.815221	0.855372	0.935345	1	2196	tags=29%, list=16%, signal=34%
GO_BP_OC_CELL_DIVISION	GO_BP_OC_CELL_DIVISION		18	0.35954	0.812592	0.73871	0.937321	1	2222	tags=22%, list=16%, signal=26%
GO_BP_OC_MULTICELLULAR_ORGANISM_GROWTH	GO_BP_OC_MULTICELLULAR_ORGANISM_GROWTH		35	0.309957	0.8106	0.791506	0.937833	1	2381	tags=29%, list=17%, signal=34%
GO_BP_OC_CELLULAR_PROTEIN_LOCALIZATION	GO_BP_OC_CELLULAR_PROTEIN_LOCALIZATION		29	0.314674	0.808595	0.79021	0.938487	1	2635	tags=31%, list=19%, signal=38%
GO_BP_OC_SIGNAL_TRANSDUCTION_BY_PHOSPHORYLATION	GO_BP_OC_SIGNAL_TRANSDUCTION_BY_PHOSPHORYLATION		21	0.342123	0.806699	0.73125	0.938919	1	1715	tags=19%, list=12%, signal=22%
GO_MF_OC_TRANSCRIPTION_REGULATORY_REGION_SEQUENCE-SPECIFIC_DNA_BINDING	GO_MF_OC_TRANSCRIPTION_REGULATORY_REGION_SEQUENCE-SPECIFIC_DNA_BINDING		30	0.313434	0.804799	0.771626	0.939471	1	1928	tags=20%, list=14%, signal=23%
GO_BP_OC_POSITIVE_REGULATION_OF_PROTEIN_CATABOLIC_PROCESS	GO_BP_OC_POSITIVE_REGULATION_OF_PROTEIN_CATABOLIC_PROCESS		21	0.340214	0.804634	0.740506	0.93656	1	1679	tags=24%, list=12%, signal=27%
GO_MF_OC_OXIDOREDUCTASE_ACTIVITY_ACTING_ON_THE_CH-OH_GROUP_OF_DONORS_NAD_OR_NADP_AS_ACCEPTOR	GO_MF_OC_OXIDOREDUCTASE_ACTIVITY_ACTING_ON_THE_CH-OH_GROUP_OF_DONORS_NAD_OR_NADP_AS_ACCEPTOR		39	0.293126	0.803546	0.840989	0.935442	1	1717	tags=18%, list=12%, signal=20%
GO_CC_OC_INTERMEDIATE_FILAMENT_CYTOSKELETON	GO_CC_OC_INTERMEDIATE_FILAMENT_CYTOSKELETON		27	0.323072	0.803074	0.767857	0.933137	1	2831	tags=33%, list=21%, signal=42%
GO_BP_OC_MIDDLE_EAR_MORPHOGENESIS	GO_BP_OC_MIDDLE_EAR_MORPHOGENESIS		18	0.360979	0.802382	0.753049	0.931224	1	1062	tags=17%, list=8%, signal=18%
GO_BP_OC_EMBRYONIC_CRANIAL_SKELETON_MORPHOGENESIS	GO_BP_OC_EMBRYONIC_CRANIAL_SKELETON_MORPHOGENESIS		16	0.363505	0.801379	0.745205	0.929716	1	2446	tags=38%, list=18%, signal=46%
GO_BP_OC_POSITIVE_REGULATION_OF_GLUCOSE_IMPORT	GO_BP_OC_POSITIVE_REGULATION_OF_GLUCOSE_IMPORT		15	0.362547	0.800433	0.747059	0.928272	1	1848	tags=27%, list=13%, signal=31%
GO_CC_OC_HISTONE_DEACETYLASE_COMPLEX	GO_CC_OC_HISTONE_DEACETYLASE_COMPLEX		18	0.351261	0.798074	0.771341	0.929392	1	2243	tags=33%, list=16%, signal=40%
GO_MF_OC_CHROMATIN_BINDING	GO_MF_OC_CHROMATIN_BINDING		170	0.230344	0.797562	1	0.927266	1	2127	tags=18%, list=15%, signal=21%
GO_BP_OC_EMBRYONIC_DIGIT_MORPHOGENESIS	GO_BP_OC_EMBRYONIC_DIGIT_MORPHOGENESIS		34	0.31007	0.794837	0.824818	0.92906	1	2043	tags=18%, list=15%, signal=21%
GO_BP_OC_NEURON_APOPTOTIC_PROCESS	GO_BP_OC_NEURON_APOPTOTIC_PROCESS		20	0.32886	0.794667	0.807074	0.926232	1	886	tags=20%, list=6%, signal=21%
GO_MF_OC_RHO_GTPASE_BINDING	GO_MF_OC_RHO_GTPASE_BINDING		21	0.334851	0.793035	0.803226	0.925895	1	2087	tags=24%, list=15%, signal=28%
GO_CC_OC_LAMELLIPODIUM	GO_CC_OC_LAMELLIPODIUM		59	0.258383	0.792719	0.914286	0.923442	1	1820	tags=20%, list=13%, signal=23%
GO_MF_OC_AMINOPEPTIDASE_ACTIVITY	GO_MF_OC_AMINOPEPTIDASE_ACTIVITY		15	0.345793	0.784293	0.786885	0.935272	1	620	tags=13%, list=5%, signal=14%
GO_BP_OC_ATP_METABOLIC_PROCESS	GO_BP_OC_ATP_METABOLIC_PROCESS		15	0.357069	0.779618	0.774286	0.940184	1	3064	tags=53%, list=22%, signal=69%
GO_BP_OC_CELLULAR_RESPONSE_TO_ORGANIC_SUBSTANCE	GO_BP_OC_CELLULAR_RESPONSE_TO_ORGANIC_SUBSTANCE		19	0.336492	0.774124	0.774096	0.946231	1	1490	tags=16%, list=11%, signal=18%
GO_CC_OC_GOLGI_MEMBRANE	GO_CC_OC_GOLGI_MEMBRANE		44	0.274144	0.77066	0.922131	0.949127	1	2612	tags=34%, list=19%, signal=42%
GO_BP_OC_REGULATION_OF_SMALL_GTPASE_MEDIATED_SIGNAL_TRANSDUCTION	GO_BP_OC_REGULATION_OF_SMALL_GTPASE_MEDIATED_SIGNAL_TRANSDUCTION		40	0.280866	0.770462	0.931034	0.946311	1	313	tags=10%, list=2%, signal=10%
GO_MF_OC_GTPASE_BINDING	GO_MF_OC_GTPASE_BINDING		16	0.346635	0.769913	0.791429	0.944039	1	2673	tags=44%, list=19%, signal=54%
GO_CC_OC_NEUROMUSCULAR_JUNCTION	GO_CC_OC_NEUROMUSCULAR_JUNCTION		20	0.328253	0.769595	0.84273	0.941464	1	1302	tags=20%, list=9%, signal=22%
GO_BP_OC_DOUBLE-STRAND_BREAK_REPAIR	GO_BP_OC_DOUBLE-STRAND_BREAK_REPAIR		32	0.288418	0.769468	0.871186	0.938589	1	3893	tags=47%, list=28%, signal=65%
GO_BP_OC_CELLULAR_IRON_ION_HOMEOSTASIS	GO_BP_OC_CELLULAR_IRON_ION_HOMEOSTASIS		19	0.324072	0.76183	0.802326	0.947131	1	1625	tags=26%, list=12%, signal=30%
GO_CC_OC_ENDOCYTIC_VESICLE	GO_CC_OC_ENDOCYTIC_VESICLE		19	0.325828	0.758858	0.801303	0.948548	1	2134	tags=32%, list=16%, signal=37%
GO_CC_OC_UBIQUITIN_LIGASE_COMPLEX	GO_CC_OC_UBIQUITIN_LIGASE_COMPLEX		39	0.282981	0.758813	0.887967	0.945551	1	1844	tags=26%, list=13%, signal=30%
GO_BP_OC_PROTEIN_TETRAMERIZATION	GO_BP_OC_PROTEIN_TETRAMERIZATION		17	0.332787	0.758515	0.833837	0.943	1	1764	tags=29%, list=13%, signal=34%
GO_BP_OC_SPERMATID_DEVELOPMENT	GO_BP_OC_SPERMATID_DEVELOPMENT		33	0.287061	0.758415	0.872483	0.940109	1	711	tags=6%, list=5%, signal=6%
GO_BP_OC_NEGATIVE_REGULATION_OF_FAT_CELL_DIFFERENTIATION	GO_BP_OC_NEGATIVE_REGULATION_OF_FAT_CELL_DIFFERENTIATION		18	0.331628	0.751974	0.840979	0.94613	1	1226	tags=22%, list=9%, signal=24%
GO_MF_OC_METHYLATED_HISTONE_RESIDUE_BINDING	GO_MF_OC_METHYLATED_HISTONE_RESIDUE_BINDING		27	0.302022	0.746368	0.885522	0.950556	1	3330	tags=33%, list=24%, signal=44%
GO_MF_OC_KINASE_BINDING	GO_MF_OC_KINASE_BINDING		21	0.315773	0.742169	0.85443	0.953282	1	3176	tags=38%, list=23%, signal=49%
GO_BP_OC_DETERMINATION_OF_LEFT_RIGHT_SYMMETRY	GO_BP_OC_DETERMINATION_OF_LEFT_RIGHT_SYMMETRY		33	0.282915	0.740063	0.919231	0.953061	1	3008	tags=27%, list=22%, signal=35%
GO_CC_OC_CATALYTIC_STEP_2_SPLICEOSOME	GO_CC_OC_CATALYTIC_STEP_2_SPLICEOSOME		49	0.259346	0.737113	0.941909	0.953856	1	2672	tags=20%, list=19%, signal=25%
GO_BP_OC_CHROMATIN_REMODELING	GO_BP_OC_CHROMATIN_REMODELING		33	0.279911	0.729291	0.920266	0.961205	1	1869	tags=21%, list=14%, signal=24%
GO_BP_OC_MICROTUBULE-BASED_PROCESS	GO_BP_OC_MICROTUBULE-BASED_PROCESS		23	0.302885	0.72801	0.88141	0.95982	1	618	tags=13%, list=4%, signal=14%
GO_BP_OC_POSITIVE_REGULATION_OF_NEURON_APOPTOTIC_PROCESS	GO_BP_OC_POSITIVE_REGULATION_OF_NEURON_APOPTOTIC_PROCESS		17	0.32082	0.72401	0.864615	0.961709	1	694	tags=18%, list=5%, signal=19%
GO_BP_OC_CHROMOSOME_ORGANIZATION	GO_BP_OC_CHROMOSOME_ORGANIZATION		19	0.31317	0.722964	0.842566	0.959781	1	3632	tags=37%, list=26%, signal=50%
GO_MF_OC_NAD_ADP-RIBOSYLTRANSFERASE_ACTIVITY	GO_MF_OC_NAD_ADP-RIBOSYLTRANSFERASE_ACTIVITY		17	0.320187	0.722095	0.872093	0.957883	1	1371	tags=18%, list=10%, signal=20%
GO_BP_OC_RAS_PROTEIN_SIGNAL_TRANSDUCTION	GO_BP_OC_RAS_PROTEIN_SIGNAL_TRANSDUCTION		15	0.318853	0.716192	0.848138	0.961852	1	57	tags=7%, list=0%, signal=7%
GO_BP_OC_REGULATION_OF_CELL_DIFFERENTIATION	GO_BP_OC_REGULATION_OF_CELL_DIFFERENTIATION		15	0.324927	0.708119	0.862857	0.967528	1	1255	tags=20%, list=9%, signal=22%
GO_BP_OC_POSITIVE_REGULATION_OF_JUN_KINASE_ACTIVITY	GO_BP_OC_POSITIVE_REGULATION_OF_JUN_KINASE_ACTIVITY		18	0.310349	0.70628	0.887879	0.966252	1	1307	tags=22%, list=9%, signal=25%
GO_BP_OC_POSITIVE_REGULATION_OF_DNA_REPLICATION	GO_BP_OC_POSITIVE_REGULATION_OF_DNA_REPLICATION		16	0.309884	0.691364	0.898551	0.978163	1	1715	tags=13%, list=12%, signal=14%
GO_BP_OC_CELLULAR_PROCESS	GO_BP_OC_CELLULAR_PROCESS		19	0.295526	0.682729	0.931232	0.982793	1	1693	tags=21%, list=12%, signal=24%
GO_BP_OC_EMBRYONIC_SKELETAL_SYSTEM_DEVELOPMENT	GO_BP_OC_EMBRYONIC_SKELETAL_SYSTEM_DEVELOPMENT		28	0.263497	0.682151	0.953405	0.980375	1	290	tags=7%, list=2%, signal=7%
GO_BP_OC_POSITIVE_REGULATION_OF_PATHWAY-RESTRICTED_SMAD_PROTEIN_PHOSPHORYLATION	GO_BP_OC_POSITIVE_REGULATION_OF_PATHWAY-RESTRICTED_SMAD_PROTEIN_PHOSPHORYLATION		20	0.291189	0.674431	0.960123	0.983709	1	928	tags=15%, list=7%, signal=16%
GO_BP_OC_TERMINATION_OF_G-PROTEIN_COUPLED_RECEPTOR_SIGNALING_PATHWAY	GO_BP_OC_TERMINATION_OF_G-PROTEIN_COUPLED_RECEPTOR_SIGNALING_PATHWAY		26	0.274151	0.670389	0.951456	0.983745	1	2945	tags=27%, list=21%, signal=34%
GO_BP_OC_POSITIVE_REGULATION_OF_SMOOTH_MUSCLE_CELL_PROLIFERATION	GO_BP_OC_POSITIVE_REGULATION_OF_SMOOTH_MUSCLE_CELL_PROLIFERATION		15	0.307693	0.666845	0.920765	0.983286	1	1594	tags=13%, list=12%, signal=15%
GO_CC_OC_SIGNALOSOME	GO_CC_OC_SIGNALOSOME		22	0.279703	0.664173	0.91	0.982359	1	1138	tags=18%, list=8%, signal=20%
GO_CC_OC_SPINDLE_MICROTUBULE	GO_CC_OC_SPINDLE_MICROTUBULE		22	0.2823	0.663551	0.947368	0.979858	1	2259	tags=32%, list=16%, signal=38%
GO_BP_OC_MITOCHONDRION_ORGANIZATION	GO_BP_OC_MITOCHONDRION_ORGANIZATION		23	0.278942	0.653912	0.95	0.983209	1	3340	tags=43%, list=24%, signal=57%
GO_CC_OC_LYSOSOMAL_MEMBRANE	GO_CC_OC_LYSOSOMAL_MEMBRANE		24	0.267853	0.625802	0.970492	0.995082	1	2347	tags=25%, list=17%, signal=30%
GO_BP_OC_NUCLEAR_MRNA_SPLICING_VIA_SPLICEOSOME	GO_BP_OC_NUCLEAR_MRNA_SPLICING_VIA_SPLICEOSOME		17	0.265841	0.609014	0.97076	0.998987	1	2488	tags=24%, list=18%, signal=29%
GO_BP_OC_DNA_DUPLEX_UNWINDING	GO_BP_OC_DNA_DUPLEX_UNWINDING		15	0.279476	0.606634	0.952514	0.99693	1	3011	tags=40%, list=22%, signal=51%
GO_BP_OC_CALCIUM-MEDIATED_SIGNALING	GO_BP_OC_CALCIUM-MEDIATED_SIGNALING		16	0.268835	0.60214	0.97043	0.995544	1	3319	tags=19%, list=24%, signal=25%
GO_MF_OC_UBIQUITIN_BINDING	GO_MF_OC_UBIQUITIN_BINDING		22	0.252063	0.594857	0.974684	0.994974	1	3319	tags=41%, list=24%, signal=54%
GO_MF_OC_DOUBLE-STRANDED_DNA_BINDING	GO_MF_OC_DOUBLE-STRANDED_DNA_BINDING		21	0.245572	0.585414	0.987138	0.994585	1	4428	tags=52%, list=32%, signal=77%
GO_CC_OC_PROTEASOME_CORE_COMPLEX	GO_CC_OC_PROTEASOME_CORE_COMPLEX		15	0.258699	0.564341	0.983051	0.996363	1	374	tags=7%, list=3%, signal=7%
GO_MF_OC_DNA-DIRECTED_RNA_POLYMERASE_ACTIVITY	GO_MF_OC_DNA-DIRECTED_RNA_POLYMERASE_ACTIVITY		20	0.213805	0.506498	1	1	1	1863	tags=15%, list=14%, signal=17%
GO_BP_OC_ENDOPLASMIC_RETICULUM_UNFOLDED_PROTEIN_RESPONSE	GO_BP_OC_ENDOPLASMIC_RETICULUM_UNFOLDED_PROTEIN_RESPONSE		16	0.229045	0.504802	0.988304	0.997645	1	2947	tags=19%, list=21%, signal=24%

## Sheet: GSEA- Moderate Humidity
NAME	GS<br> follow link to MSigDB	GS DETAILS	SIZE	ES	NES	NOM p-val	FDR q-val	FWER p-val	RANK AT MAX	LEADING EDGE
GO_MF_OC_PHEROMONE_RECEPTOR_ACTIVITY	GO_MF_OC_PHEROMONE_RECEPTOR_ACTIVITY	Details ...	106	-0.999894	-2.61446	0	0	0	1	tags=0%, list=0%, signal=0%
GO_MF_OC_SERINE-TYPE_ENDOPEPTIDASE_ACTIVITY	GO_MF_OC_SERINE-TYPE_ENDOPEPTIDASE_ACTIVITY	Details ...	88	-0.723711	-1.85042	0	0.00212563	0.005	1482	tags=31%, list=11%, signal=34%
GO_CC_OC_INTERMEDIATE_FILAMENT	GO_CC_OC_INTERMEDIATE_FILAMENT	Details ...	40	-0.791313	-1.78965	0	0.00976151	0.033	1228	tags=25%, list=9%, signal=27%
GO_MF_OC_STRUCTURAL_MOLECULE_ACTIVITY	GO_MF_OC_STRUCTURAL_MOLECULE_ACTIVITY	Details ...	99	-0.691912	-1.75553	0	0.019217	0.084	1674	tags=26%, list=12%, signal=30%
GO_CC_OC_COLLAGEN	GO_CC_OC_COLLAGEN	Details ...	35	-0.784992	-1.74131	0	0.0196931	0.105	1697	tags=51%, list=12%, signal=59%
GO_BP_OC_VENTRICULAR_CARDIAC_MUSCLE_TISSUE_MORPHOGENESIS	GO_BP_OC_VENTRICULAR_CARDIAC_MUSCLE_TISSUE_MORPHOGENESIS	Details ...	15	-0.888548	-1.73688	0	0.0189982	0.122	355	tags=33%, list=3%, signal=34%
GO_CC_OC_BASEMENT_MEMBRANE	GO_CC_OC_BASEMENT_MEMBRANE	Details ...	50	-0.727586	-1.71597	0	0.0283645	0.202	919	tags=34%, list=7%, signal=36%
GO_MF_OC_SERINE-TYPE_PEPTIDASE_ACTIVITY	GO_MF_OC_SERINE-TYPE_PEPTIDASE_ACTIVITY	Details ...	64	-0.706464	-1.70889	0	0.0296492	0.239	1030	tags=19%, list=7%, signal=20%
GO_MF_OC_SERINE-TYPE_ENDOPEPTIDASE_INHIBITOR_ACTIVITY	GO_MF_OC_SERINE-TYPE_ENDOPEPTIDASE_INHIBITOR_ACTIVITY	Details ...	50	-0.706181	-1.66845	0.00254777	0.066908	0.5	1756	tags=34%, list=13%, signal=39%
GO_BP_OC_EPIDERMIS_DEVELOPMENT	GO_BP_OC_EPIDERMIS_DEVELOPMENT	Details ...	18	-0.814369	-1.6575	0.0046729	0.0746921	0.575	1711	tags=56%, list=12%, signal=63%
GO_MF_OC_MICROTUBULE_MOTOR_ACTIVITY	GO_MF_OC_MICROTUBULE_MOTOR_ACTIVITY	Details ...	44	-0.709798	-1.64721	0.00133156	0.0836151	0.655	1824	tags=39%, list=13%, signal=44%
GO_CC_OC_EXTRACELLULAR_SPACE	GO_CC_OC_EXTRACELLULAR_SPACE	Details ...	301	-0.594294	-1.63981	0	0.0894248	0.707	1426	tags=23%, list=10%, signal=25%
GO_CC_OC_APICAL_PLASMA_MEMBRANE	GO_CC_OC_APICAL_PLASMA_MEMBRANE	Details ...	83	-0.649233	-1.62963	0	0.102621	0.786	1450	tags=24%, list=11%, signal=27%
GO_BP_OC_EXTRACELLULAR_MATRIX_ORGANIZATION	GO_BP_OC_EXTRACELLULAR_MATRIX_ORGANIZATION	Details ...	66	-0.662924	-1.62234	0.00377834	0.108474	0.832	1356	tags=27%, list=10%, signal=30%
GO_BP_OC_EPITHELIAL_CELL_DIFFERENTIATION	GO_BP_OC_EPITHELIAL_CELL_DIFFERENTIATION	Details ...	28	-0.742227	-1.59779	0.0028777	0.156128	0.931	1486	tags=39%, list=11%, signal=44%
GO_CC_OC_PROTEINACEOUS_EXTRACELLULAR_MATRIX	GO_CC_OC_PROTEINACEOUS_EXTRACELLULAR_MATRIX	Details ...	92	-0.615134	-1.58221	0	0.19112	0.972	1905	tags=38%, list=14%, signal=44%
GO_BP_OC_SKIN_DEVELOPMENT	GO_BP_OC_SKIN_DEVELOPMENT	Details ...	36	-0.709626	-1.57314	0.00261438	0.210384	0.984	1431	tags=36%, list=10%, signal=40%
GO_MF_OC_CALCIUM-DEPENDENT_PROTEIN_BINDING	GO_MF_OC_CALCIUM-DEPENDENT_PROTEIN_BINDING	Details ...	24	-0.729833	-1.54838	0.0114286	0.287623	0.996	1718	tags=38%, list=12%, signal=43%
GO_MF_OC_EXTRACELLULAR_MATRIX_STRUCTURAL_CONSTITUENT	GO_MF_OC_EXTRACELLULAR_MATRIX_STRUCTURAL_CONSTITUENT	Details ...	19	-0.759344	-1.54588	0.0134933	0.283167	0.998	720	tags=42%, list=5%, signal=44%
GO_BP_OC_INNER_EAR_DEVELOPMENT	GO_BP_OC_INNER_EAR_DEVELOPMENT	Details ...	33	-0.680823	-1.53092	0.0174029	0.330228	1	1534	tags=27%, list=11%, signal=31%
GO_CC_OC_CELL_PERIPHERY	GO_CC_OC_CELL_PERIPHERY		16	-0.781624	-1.51821	0.0175695	0.37607	1	998	tags=25%, list=7%, signal=27%
GO_CC_OC_CONNEXON_COMPLEX	GO_CC_OC_CONNEXON_COMPLEX		15	-0.787351	-1.51597	0.0141509	0.370203	1	379	tags=20%, list=3%, signal=21%
GO_BP_OC_FERTILIZATION	GO_BP_OC_FERTILIZATION		19	-0.742026	-1.50308	0.0184615	0.419436	1	2045	tags=21%, list=15%, signal=25%
GO_BP_OC_RESPONSE_TO_RETINOIC_ACID	GO_BP_OC_RESPONSE_TO_RETINOIC_ACID		17	-0.740091	-1.50091	0.0311111	0.412643	1	1184	tags=35%, list=9%, signal=39%
GO_BP_OC_KERATINOCYTE_DIFFERENTIATION	GO_BP_OC_KERATINOCYTE_DIFFERENTIATION		32	-0.682707	-1.49888	0.0187861	0.406129	1	1612	tags=34%, list=12%, signal=39%
GO_CC_OC_EXTRACELLULAR_REGION	GO_CC_OC_EXTRACELLULAR_REGION		382	-0.538259	-1.49747	0	0.397641	1	1606	tags=21%, list=12%, signal=23%
GO_BP_OC_INSULIN_SECRETION	GO_BP_OC_INSULIN_SECRETION		16	-0.756511	-1.4938	0.0378549	0.401383	1	270	tags=13%, list=2%, signal=13%
GO_BP_OC_BONE_MINERALIZATION	GO_BP_OC_BONE_MINERALIZATION		18	-0.739099	-1.49273	0.0192878	0.392281	1	2284	tags=39%, list=17%, signal=47%
GO_BP_OC_REGULATION_OF_PH	GO_BP_OC_REGULATION_OF_PH		16	-0.744879	-1.4848	0.0267459	0.417334	1	414	tags=19%, list=3%, signal=19%
GO_BP_OC_ATP_BIOSYNTHETIC_PROCESS	GO_BP_OC_ATP_BIOSYNTHETIC_PROCESS		16	-0.742809	-1.46797	0.0379147	0.491021	1	110	tags=13%, list=1%, signal=13%
GO_MF_OC_MONOOXYGENASE_ACTIVITY	GO_MF_OC_MONOOXYGENASE_ACTIVITY		51	-0.609414	-1.46316	0.0263819	0.502853	1	889	tags=18%, list=6%, signal=19%
GO_BP_OC_RESPONSE_TO_ESTROGEN_STIMULUS	GO_BP_OC_RESPONSE_TO_ESTROGEN_STIMULUS		16	-0.729242	-1.44801	0.0479233	0.575587	1	420	tags=13%, list=3%, signal=13%
GO_BP_OC_NEUROPEPTIDE_SIGNALING_PATHWAY	GO_BP_OC_NEUROPEPTIDE_SIGNALING_PATHWAY		27	-0.669103	-1.43464	0.0504909	0.640482	1	2130	tags=19%, list=15%, signal=22%
GO_CC_OC_LATERAL_PLASMA_MEMBRANE	GO_CC_OC_LATERAL_PLASMA_MEMBRANE		17	-0.715378	-1.43378	0.0624071	0.62685	1	422	tags=24%, list=3%, signal=24%
GO_BP_OC_MICROTUBULE-BASED_MOVEMENT	GO_BP_OC_MICROTUBULE-BASED_MOVEMENT		58	-0.587041	-1.43348	0.0268542	0.611029	1	1824	tags=29%, list=13%, signal=34%
GO_MF_OC_PROTEIN_BINDING_BRIDGING	GO_MF_OC_PROTEIN_BINDING_BRIDGING		15	-0.742321	-1.43223	0.0627943	0.601364	1	1350	tags=40%, list=10%, signal=44%
GO_MF_OC_SCAVENGER_RECEPTOR_ACTIVITY	GO_MF_OC_SCAVENGER_RECEPTOR_ACTIVITY		29	-0.652913	-1.43216	0.0409605	0.585579	1	1030	tags=21%, list=7%, signal=22%
GO_BP_OC_EPHRIN_RECEPTOR_SIGNALING_PATHWAY	GO_BP_OC_EPHRIN_RECEPTOR_SIGNALING_PATHWAY		24	-0.677205	-1.42989	0.045134	0.583203	1	589	tags=21%, list=4%, signal=22%
GO_BP_OC_PROTEIN_PROCESSING	GO_BP_OC_PROTEIN_PROCESSING		30	-0.654689	-1.41847	0.0565771	0.635418	1	2918	tags=53%, list=21%, signal=68%
GO_BP_OC_CELL-CELL_ADHESION	GO_BP_OC_CELL-CELL_ADHESION		47	-0.599371	-1.41399	0.032345	0.646738	1	1616	tags=23%, list=12%, signal=26%
GO_MF_OC_TRANSFERASE_ACTIVITY_TRANSFERRING_GLYCOSYL_GROUPS	GO_MF_OC_TRANSFERASE_ACTIVITY_TRANSFERRING_GLYCOSYL_GROUPS		87	-0.554247	-1.40805	0.0274791	0.66723	1	1781	tags=25%, list=13%, signal=29%
GO_MF_OC_TRANSPORTER_ACTIVITY	GO_MF_OC_TRANSPORTER_ACTIVITY		143	-0.529701	-1.40611	0.0154185	0.663095	1	1629	tags=20%, list=12%, signal=22%
GO_CC_OC_ENDOPLASMIC_RETICULUM_LUMEN	GO_CC_OC_ENDOPLASMIC_RETICULUM_LUMEN		22	-0.670907	-1.40561	0.0560472	0.650279	1	2455	tags=45%, list=18%, signal=55%
GO_BP_OC_ONE-CARBON_METABOLIC_PROCESS	GO_BP_OC_ONE-CARBON_METABOLIC_PROCESS		20	-0.681461	-1.39128	0.0694445	0.723718	1	1206	tags=25%, list=9%, signal=27%
GO_CC_OC_MYOSIN_COMPLEX	GO_CC_OC_MYOSIN_COMPLEX		33	-0.614954	-1.38729	0.0611413	0.733535	1	691	tags=18%, list=5%, signal=19%
GO_MF_OC_TRANSFERASE_ACTIVITY_TRANSFERRING_HEXOSYL_GROUPS	GO_MF_OC_TRANSFERASE_ACTIVITY_TRANSFERRING_HEXOSYL_GROUPS		26	-0.652051	-1.38603	0.0637681	0.725444	1	1204	tags=19%, list=9%, signal=21%
GO_MF_OC_SODIUM_CHANNEL_ACTIVITY	GO_MF_OC_SODIUM_CHANNEL_ACTIVITY		15	-0.708912	-1.38116	0.0847458	0.740884	1	795	tags=13%, list=6%, signal=14%
GO_BP_OC_NEGATIVE_REGULATION_OF_PROTEIN_KINASE_B_SIGNALING_CASCADE	GO_BP_OC_NEGATIVE_REGULATION_OF_PROTEIN_KINASE_B_SIGNALING_CASCADE		16	-0.697201	-1.37754	0.080315	0.749156	1	1153	tags=38%, list=8%, signal=41%
GO_MF_OC_RAB_GTPASE_BINDING	GO_MF_OC_RAB_GTPASE_BINDING		24	-0.648549	-1.37372	0.0784884	0.758208	1	1605	tags=38%, list=12%, signal=42%
GO_MF_OC_CALCIUM_ION_BINDING	GO_MF_OC_CALCIUM_ION_BINDING		452	-0.489112	-1.37266	0	0.74954	1	1815	tags=23%, list=13%, signal=26%
GO_CC_OC_EXTRACELLULAR_MATRIX	GO_CC_OC_EXTRACELLULAR_MATRIX		145	-0.514421	-1.36832	0.0143646	0.762858	1	2152	tags=39%, list=16%, signal=45%
GO_BP_OC_SKELETAL_SYSTEM_DEVELOPMENT	GO_BP_OC_SKELETAL_SYSTEM_DEVELOPMENT		51	-0.573512	-1.36436	0.0604534	0.772708	1	1445	tags=27%, list=10%, signal=31%
GO_MF_OC_MOTOR_ACTIVITY	GO_MF_OC_MOTOR_ACTIVITY		33	-0.605231	-1.35821	0.0766017	0.796979	1	691	tags=18%, list=5%, signal=19%
GO_BP_OC_NEGATIVE_REGULATION_OF_MAP_KINASE_ACTIVITY	GO_BP_OC_NEGATIVE_REGULATION_OF_MAP_KINASE_ACTIVITY		22	-0.649933	-1.35579	0.0907716	0.797174	1	2113	tags=45%, list=15%, signal=54%
GO_MF_OC_CARBOHYDRATE_BINDING	GO_MF_OC_CARBOHYDRATE_BINDING		78	-0.541568	-1.35369	0.041769	0.796399	1	1826	tags=26%, list=13%, signal=29%
GO_BP_OC_ANTIGEN_PROCESSING_AND_PRESENTATION	GO_BP_OC_ANTIGEN_PROCESSING_AND_PRESENTATION		18	-0.665901	-1.34973	0.104634	0.80758	1	2377	tags=44%, list=17%, signal=54%
GO_CC_OC_CILIUM	GO_CC_OC_CILIUM		30	-0.612252	-1.34032	0.0910384	0.855138	1	3584	tags=43%, list=26%, signal=58%
GO_BP_OC_IMMUNE_RESPONSE	GO_BP_OC_IMMUNE_RESPONSE		109	-0.513714	-1.33356	0.0387685	0.883341	1	1871	tags=25%, list=14%, signal=28%
GO_BP_OC_EMBRYONIC_FORELIMB_MORPHOGENESIS	GO_BP_OC_EMBRYONIC_FORELIMB_MORPHOGENESIS		21	-0.630968	-1.3333	0.118943	0.870107	1	2769	tags=38%, list=20%, signal=48%
GO_CC_OC_INTEGRAL_TO_GOLGI_MEMBRANE	GO_CC_OC_INTEGRAL_TO_GOLGI_MEMBRANE		30	-0.606212	-1.32961	0.113416	0.879578	1	1275	tags=27%, list=9%, signal=29%
GO_BP_OC_SODIUM_ION_TRANSPORT	GO_BP_OC_SODIUM_ION_TRANSPORT		48	-0.569784	-1.32673	0.0835476	0.884343	1	1813	tags=19%, list=13%, signal=22%
GO_CC_OC_TIGHT_JUNCTION	GO_CC_OC_TIGHT_JUNCTION		50	-0.559401	-1.32625	0.0755208	0.872985	1	1800	tags=30%, list=13%, signal=34%
GO_BP_OC_CHOLESTEROL_HOMEOSTASIS	GO_BP_OC_CHOLESTEROL_HOMEOSTASIS		36	-0.585284	-1.32432	0.0964187	0.871137	1	2295	tags=25%, list=17%, signal=30%
GO_BP_OC_POSITIVE_REGULATION_OF_INTERLEUKIN-6_PRODUCTION	GO_BP_OC_POSITIVE_REGULATION_OF_INTERLEUKIN-6_PRODUCTION		17	-0.660252	-1.32031	0.123664	0.882981	1	1673	tags=41%, list=12%, signal=47%
GO_BP_OC_POSITIVE_REGULATION_OF_CELL-SUBSTRATE_ADHESION	GO_BP_OC_POSITIVE_REGULATION_OF_CELL-SUBSTRATE_ADHESION		23	-0.631068	-1.31384	0.126437	0.911553	1	1159	tags=35%, list=8%, signal=38%
GO_BP_OC_CHONDROCYTE_DIFFERENTIATION	GO_BP_OC_CHONDROCYTE_DIFFERENTIATION		23	-0.626977	-1.31106	0.130312	0.915302	1	2488	tags=43%, list=18%, signal=53%
GO_BP_OC_POSITIVE_REGULATION_OF_PEPTIDYL-TYROSINE_PHOSPHORYLATION	GO_BP_OC_POSITIVE_REGULATION_OF_PEPTIDYL-TYROSINE_PHOSPHORYLATION		38	-0.577609	-1.30807	0.121333	0.92173	1	1844	tags=24%, list=13%, signal=27%
GO_BP_OC_INNER_EAR_MORPHOGENESIS	GO_BP_OC_INNER_EAR_MORPHOGENESIS		55	-0.542817	-1.30372	0.0914867	0.937152	1	1486	tags=15%, list=11%, signal=16%
GO_BP_OC_COLLAGEN_FIBRIL_ORGANIZATION	GO_BP_OC_COLLAGEN_FIBRIL_ORGANIZATION		25	-0.616571	-1.30099	0.119186	0.941449	1	982	tags=32%, list=7%, signal=34%
GO_MF_OC_SIALYLTRANSFERASE_ACTIVITY	GO_MF_OC_SIALYLTRANSFERASE_ACTIVITY		18	-0.639674	-1.29907	0.13615	0.940811	1	1275	tags=28%, list=9%, signal=31%
GO_BP_OC_SYNAPSE_ORGANIZATION	GO_BP_OC_SYNAPSE_ORGANIZATION		16	-0.660818	-1.29849	0.134036	0.930935	1	1281	tags=31%, list=9%, signal=34%
GO_BP_OC_NEGATIVE_REGULATION_OF_PEPTIDASE_ACTIVITY	GO_BP_OC_NEGATIVE_REGULATION_OF_PEPTIDASE_ACTIVITY		16	-0.659806	-1.29569	0.164596	0.936328	1	913	tags=19%, list=7%, signal=20%
GO_BP_OC_ACTIN_FILAMENT_BUNDLE_ASSEMBLY	GO_BP_OC_ACTIN_FILAMENT_BUNDLE_ASSEMBLY		15	-0.680869	-1.29321	0.163233	0.940417	1	2880	tags=47%, list=21%, signal=59%
GO_CC_OC_FOCAL_ADHESION	GO_CC_OC_FOCAL_ADHESION		59	-0.533893	-1.29273	0.106832	0.930795	1	2480	tags=41%, list=18%, signal=49%
GO_CC_OC_APICAL_PART_OF_CELL	GO_CC_OC_APICAL_PART_OF_CELL		50	-0.54285	-1.29215	0.114839	0.921943	1	2680	tags=34%, list=19%, signal=42%
GO_CC_OC_GAP_JUNCTION	GO_CC_OC_GAP_JUNCTION		20	-0.630703	-1.29137	0.156442	0.914543	1	379	tags=15%, list=3%, signal=15%
GO_MF_OC_ACTIN_FILAMENT_BINDING	GO_MF_OC_ACTIN_FILAMENT_BINDING		39	-0.563795	-1.29074	0.117035	0.906621	1	1151	tags=23%, list=8%, signal=25%
GO_BP_OC_HAIR_FOLLICLE_MORPHOGENESIS	GO_BP_OC_HAIR_FOLLICLE_MORPHOGENESIS		19	-0.626819	-1.28789	0.15083	0.912176	1	1215	tags=32%, list=9%, signal=35%
GO_BP_OC_SPERMATOGENESIS	GO_BP_OC_SPERMATOGENESIS		99	-0.500159	-1.28653	0.0808314	0.908672	1	1483	tags=14%, list=11%, signal=16%
GO_BP_OC_OSTEOBLAST_DIFFERENTIATION	GO_BP_OC_OSTEOBLAST_DIFFERENTIATION		30	-0.582943	-1.28471	0.12963	0.908919	1	2886	tags=43%, list=21%, signal=55%
GO_BP_OC_SUBSTRATE_ADHESION-DEPENDENT_CELL_SPREADING	GO_BP_OC_SUBSTRATE_ADHESION-DEPENDENT_CELL_SPREADING		18	-0.640635	-1.28239	0.149709	0.91213	1	533	tags=28%, list=4%, signal=29%
GO_CC_OC_CELL_JUNCTION	GO_CC_OC_CELL_JUNCTION		120	-0.493061	-1.28104	0.0684151	0.909219	1	1674	tags=22%, list=12%, signal=24%
GO_BP_OC_CELL_ADHESION	GO_BP_OC_CELL_ADHESION		174	-0.474192	-1.27225	0.0694143	0.951588	1	1899	tags=25%, list=14%, signal=28%
GO_CC_OC_CELL_LEADING_EDGE	GO_CC_OC_CELL_LEADING_EDGE		15	-0.653678	-1.27029	0.177743	0.952506	1	2445	tags=47%, list=18%, signal=57%
GO_CC_OC_CELL-CELL_JUNCTION	GO_CC_OC_CELL-CELL_JUNCTION		69	-0.513499	-1.26902	0.120098	0.949418	1	2445	tags=36%, list=18%, signal=44%
GO_BP_OC_T_CELL_ACTIVATION	GO_BP_OC_T_CELL_ACTIVATION		15	-0.655991	-1.26855	0.163166	0.941313	1	1505	tags=33%, list=11%, signal=37%
GO_BP_OC_TRANSMEMBRANE_RECEPTOR_PROTEIN_TYROSINE_KINASE_SIGNALING_PATHWAY	GO_BP_OC_TRANSMEMBRANE_RECEPTOR_PROTEIN_TYROSINE_KINASE_SIGNALING_PATHWAY		51	-0.531189	-1.26526	0.129199	0.949009	1	1195	tags=24%, list=9%, signal=26%
GO_CC_OC_RUFFLE	GO_CC_OC_RUFFLE		43	-0.544921	-1.2604	0.141375	0.966952	1	2910	tags=42%, list=21%, signal=53%
GO_BP_OC_ENDOCHONDRAL_OSSIFICATION	GO_BP_OC_ENDOCHONDRAL_OSSIFICATION		17	-0.633315	-1.25686	0.172573	0.978419	1	1616	tags=41%, list=12%, signal=47%
GO_BP_OC_PROTON_TRANSPORT	GO_BP_OC_PROTON_TRANSPORT		17	-0.63713	-1.25676	0.178626	0.968151	1	1693	tags=24%, list=12%, signal=27%
GO_MF_OC_HEME_BINDING	GO_MF_OC_HEME_BINDING		81	-0.499029	-1.2561	0.124551	0.96122	1	2193	tags=26%, list=16%, signal=31%
GO_MF_OC_IRON_ION_BINDING	GO_MF_OC_IRON_ION_BINDING		97	-0.492019	-1.25528	0.0849825	0.955643	1	2193	tags=26%, list=16%, signal=30%
GO_BP_OC_PROTEOLYSIS	GO_BP_OC_PROTEOLYSIS		334	-0.452864	-1.2546	0.0205339	0.949546	1	1737	tags=21%, list=13%, signal=23%
GO_BP_OC_EMBRYONIC_PLACENTA_DEVELOPMENT	GO_BP_OC_EMBRYONIC_PLACENTA_DEVELOPMENT		18	-0.632725	-1.25103	0.178899	0.959293	1	374	tags=11%, list=3%, signal=11%
GO_BP_OC_POSITIVE_REGULATION_OF_INTERFERON-GAMMA_PRODUCTION	GO_BP_OC_POSITIVE_REGULATION_OF_INTERFERON-GAMMA_PRODUCTION		22	-0.596991	-1.25052	0.188513	0.952007	1	2079	tags=32%, list=15%, signal=37%
GO_CC_OC_ACROSOMAL_VESICLE	GO_CC_OC_ACROSOMAL_VESICLE		18	-0.618846	-1.25013	0.18429	0.944387	1	2519	tags=28%, list=18%, signal=34%
GO_BP_OC_POSITIVE_REGULATION_OF_MAPK_CASCADE	GO_BP_OC_POSITIVE_REGULATION_OF_MAPK_CASCADE		47	-0.530993	-1.24065	0.146631	0.988833	1	1549	tags=23%, list=11%, signal=26%
GO_CC_OC_CELL-CELL_ADHERENS_JUNCTION	GO_CC_OC_CELL-CELL_ADHERENS_JUNCTION		21	-0.601418	-1.23871	0.185239	0.990015	1	1612	tags=43%, list=12%, signal=48%
GO_BP_OC_REGULATION_OF_TRANSLATION	GO_BP_OC_REGULATION_OF_TRANSLATION		15	-0.630831	-1.23828	0.2125	0.982599	1	76	tags=7%, list=1%, signal=7%
GO_BP_OC_NEGATIVE_REGULATION_OF_INFLAMMATORY_RESPONSE	GO_BP_OC_NEGATIVE_REGULATION_OF_INFLAMMATORY_RESPONSE		26	-0.580746	-1.23804	0.193182	0.97412	1	2191	tags=35%, list=16%, signal=41%
GO_BP_OC_EXOCYTOSIS	GO_BP_OC_EXOCYTOSIS		17	-0.625118	-1.23606	0.207576	0.975772	1	1438	tags=35%, list=10%, signal=39%
GO_MF_OC_OXIDOREDUCTASE_PAIRED_DONORS_REDUCTION_OXYGEN	GO_MF_OC_OXIDOREDUCTASE_PAIRED_DONORS_REDUCTION_OXYGEN		53	-0.520068	-1.23254	0.160622	0.986382	1	2649	tags=36%, list=19%, signal=44%
GO_MF_OC_ATPASE_ACTIVITY_COUPLED_TO_TRANSMEMBRANE_MOVEMENT_OF_SUBSTANCES	GO_MF_OC_ATPASE_ACTIVITY_COUPLED_TO_TRANSMEMBRANE_MOVEMENT_OF_SUBSTANCES		24	-0.585422	-1.23178	0.187316	0.981182	1	1145	tags=13%, list=8%, signal=14%
GO_MF_OC_ELECTRON_CARRIER_ACTIVITY	GO_MF_OC_ELECTRON_CARRIER_ACTIVITY		73	-0.498063	-1.22941	0.146914	0.984764	1	1506	tags=18%, list=11%, signal=20%
GO_BP_OC_ENDOSOME_ORGANIZATION	GO_BP_OC_ENDOSOME_ORGANIZATION		15	-0.628221	-1.22923	0.219969	0.976364	1	1769	tags=27%, list=13%, signal=31%
GO_MF_OC_PEPTIDASE_INHIBITOR_ACTIVITY	GO_MF_OC_PEPTIDASE_INHIBITOR_ACTIVITY		15	-0.631897	-1.22835	0.217778	0.971974	1	913	tags=20%, list=7%, signal=21%
GO_MF_OC_ATPASE_ACTIVITY	GO_MF_OC_ATPASE_ACTIVITY		92	-0.484007	-1.22743	0.123821	0.968215	1	1145	tags=12%, list=8%, signal=13%
GO_MF_OC_PROTEASE_BINDING	GO_MF_OC_PROTEASE_BINDING		29	-0.553324	-1.22716	0.183644	0.960789	1	1235	tags=28%, list=9%, signal=30%
GO_BP_OC_APOPTOTIC_PROCESS	GO_BP_OC_APOPTOTIC_PROCESS		125	-0.464323	-1.22643	0.112849	0.95592	1	2918	tags=33%, list=21%, signal=41%
GO_BP_OC_INFLAMMATORY_RESPONSE	GO_BP_OC_INFLAMMATORY_RESPONSE		66	-0.498148	-1.22513	0.138272	0.954339	1	1927	tags=26%, list=14%, signal=30%
GO_BP_OC_POSITIVE_REGULATION_OF_RHO_GTPASE_ACTIVITY	GO_BP_OC_POSITIVE_REGULATION_OF_RHO_GTPASE_ACTIVITY		17	-0.621489	-1.22142	0.216923	0.966229	1	1763	tags=35%, list=13%, signal=40%
GO_CC_OC_SPINDLE	GO_CC_OC_SPINDLE		35	-0.555402	-1.21911	0.202721	0.970205	1	2222	tags=37%, list=16%, signal=44%
GO_BP_OC_PHOTORECEPTOR_CELL_MAINTENANCE	GO_BP_OC_PHOTORECEPTOR_CELL_MAINTENANCE		17	-0.609749	-1.2191	0.237879	0.961719	1	529	tags=12%, list=4%, signal=12%
GO_BP_OC_ODONTOGENESIS	GO_BP_OC_ODONTOGENESIS		16	-0.620058	-1.21873	0.219814	0.955224	1	533	tags=25%, list=4%, signal=26%
GO_BP_OC_POSITIVE_REGULATION_OF_ERK1_AND_ERK2_CASCADE	GO_BP_OC_POSITIVE_REGULATION_OF_ERK1_AND_ERK2_CASCADE		52	-0.512337	-1.21665	0.182051	0.958077	1	1844	tags=29%, list=13%, signal=33%
GO_CC_OC_INTEGRAL_TO_PLASMA_MEMBRANE	GO_CC_OC_INTEGRAL_TO_PLASMA_MEMBRANE		151	-0.462766	-1.21557	0.125409	0.955316	1	1478	tags=15%, list=11%, signal=16%
GO_CC_OC_ADHERENS_JUNCTION	GO_CC_OC_ADHERENS_JUNCTION		20	-0.587164	-1.21151	0.211144	0.968662	1	1761	tags=35%, list=13%, signal=40%
GO_BP_OC_RESPONSE_TO_LIPOPOLYSACCHARIDE	GO_BP_OC_RESPONSE_TO_LIPOPOLYSACCHARIDE		51	-0.507742	-1.2074	0.173804	0.982698	1	2027	tags=25%, list=15%, signal=30%
GO_MF_OC_ENDOPEPTIDASE_ACTIVITY	GO_MF_OC_ENDOPEPTIDASE_ACTIVITY		41	-0.524118	-1.20644	0.205163	0.979659	1	2093	tags=24%, list=15%, signal=29%
GO_MF_OC_GROWTH_FACTOR_ACTIVITY	GO_MF_OC_GROWTH_FACTOR_ACTIVITY		72	-0.487502	-1.20458	0.158788	0.981673	1	2557	tags=25%, list=19%, signal=31%
GO_BP_OC_ATP_CATABOLIC_PROCESS	GO_BP_OC_ATP_CATABOLIC_PROCESS		83	-0.485012	-1.20372	0.169014	0.978281	1	1145	tags=12%, list=8%, signal=13%
GO_MF_OC_LIPID_BINDING	GO_MF_OC_LIPID_BINDING		46	-0.512421	-1.19559	0.212548	1	1	1220	tags=17%, list=9%, signal=19%
GO_CC_OC_ACTIN_CYTOSKELETON	GO_CC_OC_ACTIN_CYTOSKELETON		97	-0.470011	-1.19063	0.172535	1	1	1538	tags=20%, list=11%, signal=22%
GO_MF_OC_PHOSPHOPROTEIN_BINDING	GO_MF_OC_PHOSPHOPROTEIN_BINDING		17	-0.588989	-1.18953	0.269173	1	1	1197	tags=18%, list=9%, signal=19%
GO_BP_OC_LUNG_ALVEOLUS_DEVELOPMENT	GO_BP_OC_LUNG_ALVEOLUS_DEVELOPMENT		25	-0.555923	-1.18929	0.235036	1	1	1505	tags=28%, list=11%, signal=31%
GO_BP_OC_HOMOPHILIC_CELL_ADHESION	GO_BP_OC_HOMOPHILIC_CELL_ADHESION		70	-0.487528	-1.18911	0.171817	1	1	911	tags=14%, list=7%, signal=15%
GO_BP_OC_CELL-MATRIX_ADHESION	GO_BP_OC_CELL-MATRIX_ADHESION		39	-0.525775	-1.186	0.227092	1	1	1899	tags=28%, list=14%, signal=33%
GO_BP_OC_NEGATIVE_REGULATION_OF_NF-KAPPAB_TRANSCRIPTION_FACTOR_ACTIVITY	GO_BP_OC_NEGATIVE_REGULATION_OF_NF-KAPPAB_TRANSCRIPTION_FACTOR_ACTIVITY		31	-0.528706	-1.18579	0.258904	1	1	593	tags=10%, list=4%, signal=10%
GO_MF_OC_CATALYTIC_ACTIVITY	GO_MF_OC_CATALYTIC_ACTIVITY		487	-0.423446	-1.18532	0.0493454	1	1	1482	tags=16%, list=11%, signal=17%
GO_BP_OC_ATP_HYDROLYSIS_COUPLED_PROTON_TRANSPORT	GO_BP_OC_ATP_HYDROLYSIS_COUPLED_PROTON_TRANSPORT		18	-0.582459	-1.18397	0.259259	1	1	3102	tags=33%, list=23%, signal=43%
GO_BP_OC_RESPONSE_TO_WOUNDING	GO_BP_OC_RESPONSE_TO_WOUNDING		18	-0.601522	-1.18279	0.257274	1	1	1551	tags=22%, list=11%, signal=25%
GO_MF_OC_TRANSMEMBRANE_TRANSPORTER_ACTIVITY	GO_MF_OC_TRANSMEMBRANE_TRANSPORTER_ACTIVITY		23	-0.56438	-1.18195	0.235624	1	1	2757	tags=30%, list=20%, signal=38%
GO_CC_OC_INTEGRAL_TO_ENDOPLASMIC_RETICULUM_MEMBRANE	GO_CC_OC_INTEGRAL_TO_ENDOPLASMIC_RETICULUM_MEMBRANE		35	-0.526249	-1.17793	0.238356	1	1	1568	tags=23%, list=11%, signal=26%
GO_BP_OC_GLUTATHIONE_METABOLIC_PROCESS	GO_BP_OC_GLUTATHIONE_METABOLIC_PROCESS		17	-0.590652	-1.17664	0.271739	1	1	1138	tags=29%, list=8%, signal=32%
GO_BP_OC_T_CELL_RECEPTOR_SIGNALING_PATHWAY	GO_BP_OC_T_CELL_RECEPTOR_SIGNALING_PATHWAY		22	-0.562661	-1.17647	0.248571	1	1	2356	tags=36%, list=17%, signal=44%
GO_BP_OC_NEGATIVE_REGULATION_OF_TUMOR_NECROSIS_FACTOR_PRODUCTION	GO_BP_OC_NEGATIVE_REGULATION_OF_TUMOR_NECROSIS_FACTOR_PRODUCTION		19	-0.574079	-1.17336	0.276018	1	1	2365	tags=32%, list=17%, signal=38%
GO_BP_OC_POSITIVE_REGULATION_OF_TUMOR_NECROSIS_FACTOR_PRODUCTION	GO_BP_OC_POSITIVE_REGULATION_OF_TUMOR_NECROSIS_FACTOR_PRODUCTION		18	-0.574106	-1.17073	0.268657	1	1	1941	tags=33%, list=14%, signal=39%
GO_BP_OC_REGULATION_OF_CELL_ADHESION	GO_BP_OC_REGULATION_OF_CELL_ADHESION		22	-0.564222	-1.16774	0.271772	1	1	1153	tags=23%, list=8%, signal=25%
GO_BP_OC_NEGATIVE_REGULATION_OF_WNT_RECEPTOR_SIGNALING_PATHWAY	GO_BP_OC_NEGATIVE_REGULATION_OF_WNT_RECEPTOR_SIGNALING_PATHWAY		28	-0.546485	-1.16585	0.271693	1	1	2253	tags=32%, list=16%, signal=38%
GO_BP_OC_NEGATIVE_REGULATION_OF_ANGIOGENESIS	GO_BP_OC_NEGATIVE_REGULATION_OF_ANGIOGENESIS		31	-0.5251	-1.16155	0.262943	1	1	838	tags=16%, list=6%, signal=17%
GO_MF_OC_PEPTIDASE_ACTIVITY	GO_MF_OC_PEPTIDASE_ACTIVITY		205	-0.426802	-1.16104	0.152197	1	1	2093	tags=22%, list=15%, signal=26%
GO_MF_OC_OXIDOREDUCTASE_ACTIVITY	GO_MF_OC_OXIDOREDUCTASE_ACTIVITY		312	-0.418407	-1.15787	0.134515	1	1	1653	tags=20%, list=12%, signal=22%
GO_BP_OC_NEGATIVE_REGULATION_OF_GENE_EXPRESSION	GO_BP_OC_NEGATIVE_REGULATION_OF_GENE_EXPRESSION		45	-0.493057	-1.15466	0.260184	1	1	2492	tags=33%, list=18%, signal=41%
GO_CC_OC_CELL_SURFACE	GO_CC_OC_CELL_SURFACE		186	-0.427446	-1.15407	0.197228	1	1	2485	tags=27%, list=18%, signal=33%
GO_BP_OC_NEGATIVE_REGULATION_OF_PHOSPHATASE_ACTIVITY	GO_BP_OC_NEGATIVE_REGULATION_OF_PHOSPHATASE_ACTIVITY		34	-0.510176	-1.15154	0.287449	1	1	2942	tags=38%, list=21%, signal=49%
GO_BP_OC_CELLULAR_RESPONSE_TO_AMINO_ACID_STIMULUS	GO_BP_OC_CELLULAR_RESPONSE_TO_AMINO_ACID_STIMULUS		24	-0.548292	-1.15088	0.266082	1	1	1549	tags=33%, list=11%, signal=37%
GO_BP_OC_NUCLEOCYTOPLASMIC_TRANSPORT	GO_BP_OC_NUCLEOCYTOPLASMIC_TRANSPORT		84	-0.452233	-1.14959	0.240283	1	1	2044	tags=18%, list=15%, signal=21%
GO_BP_OC_MULTICELLULAR_ORGANISMAL_DEVELOPMENT	GO_BP_OC_MULTICELLULAR_ORGANISMAL_DEVELOPMENT		153	-0.432298	-1.14875	0.205915	1	1	2974	tags=29%, list=22%, signal=36%
GO_BP_OC_LIPID_METABOLIC_PROCESS	GO_BP_OC_LIPID_METABOLIC_PROCESS		87	-0.449312	-1.14656	0.223529	1	1	1734	tags=20%, list=13%, signal=22%
GO_BP_OC_RESPONSE_TO_TUMOR_NECROSIS_FACTOR	GO_BP_OC_RESPONSE_TO_TUMOR_NECROSIS_FACTOR		15	-0.598693	-1.14651	0.302362	1	1	1957	tags=33%, list=14%, signal=39%
GO_BP_OC_CHROMOSOME_SEGREGATION	GO_BP_OC_CHROMOSOME_SEGREGATION		23	-0.55096	-1.14629	0.299854	1	1	2166	tags=30%, list=16%, signal=36%
GO_BP_OC_POSITIVE_REGULATION_OF_CELL_MIGRATION	GO_BP_OC_POSITIVE_REGULATION_OF_CELL_MIGRATION		59	-0.473502	-1.14222	0.25413	1	1	1033	tags=19%, list=8%, signal=20%
GO_BP_OC_NEGATIVE_REGULATION_OF_PROTEIN_KINASE_ACTIVITY	GO_BP_OC_NEGATIVE_REGULATION_OF_PROTEIN_KINASE_ACTIVITY		28	-0.529267	-1.14198	0.302687	1	1	931	tags=18%, list=7%, signal=19%
GO_MF_OC_PHOSPHOLIPID_BINDING	GO_MF_OC_PHOSPHOLIPID_BINDING		231	-0.41548	-1.14133	0.192025	1	1	2913	tags=32%, list=21%, signal=40%
GO_CC_OC_INTRINSIC_TO_ENDOPLASMIC_RETICULUM_MEMBRANE	GO_CC_OC_INTRINSIC_TO_ENDOPLASMIC_RETICULUM_MEMBRANE		17	-0.5851	-1.14106	0.317293	1	1	770	tags=12%, list=6%, signal=12%
GO_BP_OC_CELLULAR_RESPONSE_TO_RETINOIC_ACID	GO_BP_OC_CELLULAR_RESPONSE_TO_RETINOIC_ACID		19	-0.561397	-1.14043	0.322254	1	1	1924	tags=37%, list=14%, signal=43%
GO_CC_OC_LYSOSOME	GO_CC_OC_LYSOSOME		80	-0.452625	-1.13866	0.258222	1	1	2402	tags=34%, list=17%, signal=41%
GO_CC_OC_CELL_CORTEX	GO_CC_OC_CELL_CORTEX		39	-0.488966	-1.13714	0.282401	1	1	1820	tags=28%, list=13%, signal=32%
GO_CC_OC_LIPID_PARTICLE	GO_CC_OC_LIPID_PARTICLE		19	-0.556235	-1.13701	0.326284	1	1	2176	tags=37%, list=16%, signal=44%
GO_BP_OC_SENSORY_PERCEPTION_OF_PAIN	GO_BP_OC_SENSORY_PERCEPTION_OF_PAIN		18	-0.556813	-1.13648	0.3003	1	1	3060	tags=28%, list=22%, signal=36%
GO_CC_OC_CYTOPLASMIC_MEMBRANE-BOUNDED_VESICLE	GO_CC_OC_CYTOPLASMIC_MEMBRANE-BOUNDED_VESICLE		37	-0.504888	-1.13395	0.298103	1	1	2203	tags=27%, list=16%, signal=32%
GO_BP_OC_EMBRYO_IMPLANTATION	GO_BP_OC_EMBRYO_IMPLANTATION		17	-0.570202	-1.13278	0.333853	1	1	1420	tags=35%, list=10%, signal=39%
GO_CC_OC_FILAMENTOUS_ACTIN	GO_CC_OC_FILAMENTOUS_ACTIN		15	-0.584364	-1.13183	0.316614	1	1	1441	tags=20%, list=10%, signal=22%
GO_CC_OC_MICROVILLUS	GO_CC_OC_MICROVILLUS		21	-0.545762	-1.13156	0.321221	1	1	1693	tags=29%, list=12%, signal=33%
GO_CC_OC_MEMBRANE_COAT	GO_CC_OC_MEMBRANE_COAT		19	-0.557466	-1.13132	0.317629	1	1	1945	tags=21%, list=14%, signal=24%
GO_BP_OC_CELL_CYCLE	GO_BP_OC_CELL_CYCLE		40	-0.490808	-1.13018	0.296097	1	1	3510	tags=45%, list=25%, signal=60%
GO_BP_OC_DEFENSE_RESPONSE_TO_GRAM-POSITIVE_BACTERIUM	GO_BP_OC_DEFENSE_RESPONSE_TO_GRAM-POSITIVE_BACTERIUM		28	-0.526573	-1.13013	0.321127	1	1	2868	tags=32%, list=21%, signal=41%
GO_BP_OC_REGULATION_OF_CELL_GROWTH	GO_BP_OC_REGULATION_OF_CELL_GROWTH		18	-0.56608	-1.12862	0.322679	1	1	1326	tags=17%, list=10%, signal=18%
GO_BP_OC_PROTEIN_GLYCOSYLATION	GO_BP_OC_PROTEIN_GLYCOSYLATION		46	-0.479829	-1.12796	0.282185	1	1	2356	tags=26%, list=17%, signal=31%
GO_BP_OC_POSITIVE_REGULATION_OF_CAMP_BIOSYNTHETIC_PROCESS	GO_BP_OC_POSITIVE_REGULATION_OF_CAMP_BIOSYNTHETIC_PROCESS		22	-0.537794	-1.12738	0.325301	1	1	1944	tags=27%, list=14%, signal=32%
GO_MF_OC_PHOSPHATIDYLINOSITOL-45-BISPHOSPHATE_BINDING	GO_MF_OC_PHOSPHATIDYLINOSITOL-45-BISPHOSPHATE_BINDING		16	-0.57271	-1.12221	0.330233	1	1	2991	tags=50%, list=22%, signal=64%
GO_BP_OC_CELLULAR_RESPONSE_TO_TUMOR_NECROSIS_FACTOR	GO_BP_OC_CELLULAR_RESPONSE_TO_TUMOR_NECROSIS_FACTOR		19	-0.552732	-1.12023	0.332312	1	1	1619	tags=21%, list=12%, signal=24%
GO_BP_OC_CARDIAC_MUSCLE_CONTRACTION	GO_BP_OC_CARDIAC_MUSCLE_CONTRACTION		17	-0.565523	-1.12013	0.337481	1	1	393	tags=18%, list=3%, signal=18%
GO_BP_OC_POSITIVE_REGULATION_OF_CANONICAL_WNT_RECEPTOR_SIGNALING_PATHWAY	GO_BP_OC_POSITIVE_REGULATION_OF_CANONICAL_WNT_RECEPTOR_SIGNALING_PATHWAY		38	-0.48748	-1.1192	0.299724	1	1	2433	tags=37%, list=18%, signal=45%
GO_CC_OC_BASOLATERAL_PLASMA_MEMBRANE	GO_CC_OC_BASOLATERAL_PLASMA_MEMBRANE		63	-0.455008	-1.1185	0.29771	1	1	2676	tags=24%, list=19%, signal=29%
GO_BP_OC_TRIGLYCERIDE_METABOLIC_PROCESS	GO_BP_OC_TRIGLYCERIDE_METABOLIC_PROCESS		16	-0.565548	-1.11458	0.333856	1	1	1220	tags=13%, list=9%, signal=14%
GO_BP_OC_OXIDATION-REDUCTION_PROCESS	GO_BP_OC_OXIDATION-REDUCTION_PROCESS		388	-0.398289	-1.11019	0.197544	1	1	2193	tags=23%, list=16%, signal=27%
GO_MF_OC_TRANSFERASE_ACTIVITY	GO_MF_OC_TRANSFERASE_ACTIVITY		363	-0.397719	-1.11008	0.217259	1	1	1363	tags=15%, list=10%, signal=17%
GO_MF_OC_NADP_BINDING1	GO_MF_OC_NADP_BINDING1		20	-0.539743	-1.10885	0.351551	1	1	897	tags=20%, list=7%, signal=21%
GO_BP_OC_CILIUM_MORPHOGENESIS	GO_BP_OC_CILIUM_MORPHOGENESIS		25	-0.52376	-1.10866	0.321752	1	1	2234	tags=32%, list=16%, signal=38%
GO_BP_OC_MAPK_CASCADE	GO_BP_OC_MAPK_CASCADE		54	-0.463664	-1.10827	0.294643	1	1	2490	tags=30%, list=18%, signal=36%
GO_BP_OC_NEUROMUSCULAR_JUNCTION_DEVELOPMENT	GO_BP_OC_NEUROMUSCULAR_JUNCTION_DEVELOPMENT		17	-0.567269	-1.10816	0.357771	1	1	1861	tags=29%, list=14%, signal=34%
GO_BP_OC_VISUAL_PERCEPTION	GO_BP_OC_VISUAL_PERCEPTION		47	-0.470302	-1.10653	0.31871	1	1	1494	tags=15%, list=11%, signal=17%
GO_CC_OC_MICROTUBULE_BASAL_BODY	GO_CC_OC_MICROTUBULE_BASAL_BODY		23	-0.52972	-1.10525	0.346648	1	1	3680	tags=52%, list=27%, signal=71%
GO_BP_OC_FATTY_ACID_BIOSYNTHETIC_PROCESS	GO_BP_OC_FATTY_ACID_BIOSYNTHETIC_PROCESS		17	-0.553801	-1.10445	0.339734	1	1	2184	tags=24%, list=16%, signal=28%
GO_BP_OC_POSITIVE_REGULATION_OF_ACTIN_FILAMENT_POLYMERIZATION	GO_BP_OC_POSITIVE_REGULATION_OF_ACTIN_FILAMENT_POLYMERIZATION		22	-0.536568	-1.10412	0.338831	1	1	3423	tags=50%, list=25%, signal=66%
GO_MF_OC_STRUCTURAL_CONSTITUENT_OF_RIBOSOME	GO_MF_OC_STRUCTURAL_CONSTITUENT_OF_RIBOSOME		66	-0.454364	-1.10385	0.31407	1	1	3367	tags=52%, list=24%, signal=68%
GO_BP_OC_NEUROGENESIS	GO_BP_OC_NEUROGENESIS		20	-0.54171	-1.10364	0.347892	1	1	2814	tags=30%, list=20%, signal=38%
GO_MF_OC_PDZ_DOMAIN_BINDING	GO_MF_OC_PDZ_DOMAIN_BINDING		35	-0.483877	-1.10176	0.33557	1	1	2489	tags=34%, list=18%, signal=42%
GO_CC_OC_PERINUCLEAR_REGION_OF_CYTOPLASM	GO_CC_OC_PERINUCLEAR_REGION_OF_CYTOPLASM		171	-0.409442	-1.10174	0.281938	1	1	2140	tags=20%, list=16%, signal=23%
GO_BP_OC_OSSIFICATION	GO_BP_OC_OSSIFICATION		32	-0.490301	-1.09939	0.334734	1	1	451	tags=9%, list=3%, signal=10%
GO_BP_OC_CELL-CELL_SIGNALING	GO_BP_OC_CELL-CELL_SIGNALING		37	-0.482735	-1.0993	0.332895	1	1	1372	tags=22%, list=10%, signal=24%
GO_MF_OC_ACTIN_BINDING	GO_MF_OC_ACTIN_BINDING		117	-0.421567	-1.09747	0.284424	1	1	1104	tags=14%, list=8%, signal=15%
GO_BP_OC_CATION_TRANSPORT	GO_BP_OC_CATION_TRANSPORT		68	-0.444793	-1.09689	0.30625	1	1	1793	tags=19%, list=13%, signal=22%
GO_BP_OC_PEPTIDYL-TYROSINE_PHOSPHORYLATION	GO_BP_OC_PEPTIDYL-TYROSINE_PHOSPHORYLATION		42	-0.462502	-1.09669	0.322539	1	1	998	tags=19%, list=7%, signal=20%
GO_MF_OC_PEROXIDASE_ACTIVITY	GO_MF_OC_PEROXIDASE_ACTIVITY		16	-0.566902	-1.09662	0.347896	1	1	2494	tags=44%, list=18%, signal=53%
GO_BP_OC_BLOOD_COAGULATION	GO_BP_OC_BLOOD_COAGULATION		28	-0.501363	-1.09524	0.351093	1	1	1648	tags=21%, list=12%, signal=24%
GO_BP_OC_ACTIVATION_OF_CYSTEINE-TYPE_ENDOPEPTIDASE_ACTIVITY_INVOLVED_IN_APOPTOTIC_PROCESS	GO_BP_OC_ACTIVATION_OF_CYSTEINE-TYPE_ENDOPEPTIDASE_ACTIVITY_INVOLVED_IN_APOPTOTIC_PROCESS		40	-0.484989	-1.09389	0.34097	1	1	2613	tags=33%, list=19%, signal=40%
GO_BP_OC_EMBRYONIC_DIGESTIVE_TRACT_MORPHOGENESIS	GO_BP_OC_EMBRYONIC_DIGESTIVE_TRACT_MORPHOGENESIS		17	-0.548988	-1.09259	0.370992	1	1	430	tags=12%, list=3%, signal=12%
GO_CC_OC_ENDOPLASMIC_RETICULUM-GOLGI_INTERMEDIATE_COMPARTMENT	GO_CC_OC_ENDOPLASMIC_RETICULUM-GOLGI_INTERMEDIATE_COMPARTMENT		22	-0.528749	-1.08856	0.378299	1	1	885	tags=18%, list=6%, signal=19%
GO_BP_OC_TRANSMEMBRANE_TRANSPORT	GO_BP_OC_TRANSMEMBRANE_TRANSPORT		323	-0.391197	-1.0877	0.257436	1	1	1940	tags=14%, list=14%, signal=16%
GO_MF_OC_PROTEIN_SELF-ASSOCIATION	GO_MF_OC_PROTEIN_SELF-ASSOCIATION		17	-0.541113	-1.08561	0.393136	1	1	3086	tags=47%, list=22%, signal=61%
GO_BP_OC_CELLULAR_RESPONSE_TO_MECHANICAL_STIMULUS	GO_BP_OC_CELLULAR_RESPONSE_TO_MECHANICAL_STIMULUS		29	-0.501805	-1.08406	0.366758	1	1	3013	tags=48%, list=22%, signal=62%
GO_MF_OC_CYTOKINE_ACTIVITY	GO_MF_OC_CYTOKINE_ACTIVITY		57	-0.451457	-1.08184	0.344828	1	1	1606	tags=23%, list=12%, signal=26%
GO_BP_OC_NUCLEOBASE-CONTAINING_COMPOUND_METABOLIC_PROCESS	GO_BP_OC_NUCLEOBASE-CONTAINING_COMPOUND_METABOLIC_PROCESS		31	-0.491583	-1.08149	0.358127	1	1	569	tags=13%, list=4%, signal=13%
GO_BP_OC_HOMEOSTASIS_OF_NUMBER_OF_CELLS_WITHIN_A_TISSUE	GO_BP_OC_HOMEOSTASIS_OF_NUMBER_OF_CELLS_WITHIN_A_TISSUE		18	-0.539069	-1.08146	0.379154	1	1	500	tags=11%, list=4%, signal=12%
GO_BP_OC_CELLULAR_RESPONSE_TO_LIPOPOLYSACCHARIDE	GO_BP_OC_CELLULAR_RESPONSE_TO_LIPOPOLYSACCHARIDE		31	-0.499779	-1.07676	0.370474	1	1	2191	tags=29%, list=16%, signal=34%
GO_BP_OC_LIPOPOLYSACCHARIDE-MEDIATED_SIGNALING_PATHWAY	GO_BP_OC_LIPOPOLYSACCHARIDE-MEDIATED_SIGNALING_PATHWAY		22	-0.524549	-1.07667	0.397037	1	1	1673	tags=23%, list=12%, signal=26%
GO_BP_OC_PITUITARY_GLAND_DEVELOPMENT	GO_BP_OC_PITUITARY_GLAND_DEVELOPMENT		17	-0.537043	-1.07557	0.385307	1	1	132	tags=6%, list=1%, signal=6%
GO_MF_OC_BETA-CATENIN_BINDING	GO_MF_OC_BETA-CATENIN_BINDING		40	-0.476348	-1.07382	0.355769	1	1	3600	tags=45%, list=26%, signal=61%
GO_MF_OC_HYDROLASE_ACTIVITY_ACTING_ON_ACID_ANHYDRIDES_CATALYZING_TRANSMEMBRANE_MOVEMENT_OF_SUBSTANCES	GO_MF_OC_HYDROLASE_ACTIVITY_ACTING_ON_ACID_ANHYDRIDES_CATALYZING_TRANSMEMBRANE_MOVEMENT_OF_SUBSTANCES		35	-0.482861	-1.07342	0.356948	1	1	1693	tags=20%, list=12%, signal=23%
GO_MF_OC_RECEPTOR_BINDING	GO_MF_OC_RECEPTOR_BINDING		167	-0.397895	-1.07228	0.328694	1	1	2327	tags=26%, list=17%, signal=31%
GO_BP_OC_POSITIVE_REGULATION_OF_FIBROBLAST_PROLIFERATION	GO_BP_OC_POSITIVE_REGULATION_OF_FIBROBLAST_PROLIFERATION		28	-0.488702	-1.07156	0.37409	1	1	1844	tags=32%, list=13%, signal=37%
GO_BP_OC_NEGATIVE_REGULATION_OF_GROWTH_OF_SYMBIONT_IN_HOST	GO_BP_OC_NEGATIVE_REGULATION_OF_GROWTH_OF_SYMBIONT_IN_HOST		15	-0.55849	-1.06771	0.416933	1	1	3618	tags=40%, list=26%, signal=54%
GO_MF_OC_CYSTEINE-TYPE_ENDOPEPTIDASE_INHIBITOR_ACTIVITY_INVOLVED_IN_APOPTOTIC_PROCESS	GO_MF_OC_CYSTEINE-TYPE_ENDOPEPTIDASE_INHIBITOR_ACTIVITY_INVOLVED_IN_APOPTOTIC_PROCESS		15	-0.546511	-1.06667	0.395455	1	1	1219	tags=27%, list=9%, signal=29%
GO_BP_OC_CELL_FATE_SPECIFICATION	GO_BP_OC_CELL_FATE_SPECIFICATION		18	-0.528007	-1.06658	0.408882	1	1	132	tags=6%, list=1%, signal=6%
GO_BP_OC_INTRACELLULAR_PROTEIN_TRANSPORT	GO_BP_OC_INTRACELLULAR_PROTEIN_TRANSPORT		212	-0.392597	-1.06491	0.342612	1	1	2140	tags=18%, list=16%, signal=21%
GO_BP_OC_PATTERN_SPECIFICATION_PROCESS	GO_BP_OC_PATTERN_SPECIFICATION_PROCESS		42	-0.463577	-1.06453	0.385848	1	1	1215	tags=14%, list=9%, signal=16%
GO_BP_OC_DNA_METABOLIC_PROCESS	GO_BP_OC_DNA_METABOLIC_PROCESS		17	-0.535306	-1.06313	0.398485	1	1	2209	tags=24%, list=16%, signal=28%
GO_CC_OC_MICROTUBULE	GO_CC_OC_MICROTUBULE		91	-0.420355	-1.06222	0.382831	1	1	2021	tags=23%, list=15%, signal=27%
GO_BP_OC_GROWTH	GO_BP_OC_GROWTH		27	-0.494169	-1.06164	0.394469	1	1	1025	tags=19%, list=7%, signal=20%
GO_BP_OC_CILIUM_ASSEMBLY	GO_BP_OC_CILIUM_ASSEMBLY		39	-0.466458	-1.06131	0.380637	1	1	184	tags=5%, list=1%, signal=5%
GO_BP_OC_GERM_CELL_DEVELOPMENT	GO_BP_OC_GERM_CELL_DEVELOPMENT		25	-0.501367	-1.0587	0.404591	1	1	1297	tags=16%, list=9%, signal=18%
GO_BP_OC_EMBRYONIC_DIGESTIVE_TRACT_DEVELOPMENT	GO_BP_OC_EMBRYONIC_DIGESTIVE_TRACT_DEVELOPMENT		16	-0.530859	-1.05589	0.425039	1	1	2097	tags=38%, list=15%, signal=44%
GO_BP_OC_POSITIVE_REGULATION_OF_ANGIOGENESIS	GO_BP_OC_POSITIVE_REGULATION_OF_ANGIOGENESIS		44	-0.457028	-1.05434	0.394062	1	1	1092	tags=20%, list=8%, signal=22%
GO_BP_OC_PROTEIN_TRANSPORT	GO_BP_OC_PROTEIN_TRANSPORT		193	-0.390144	-1.05355	0.361884	1	1	2813	tags=27%, list=20%, signal=33%
GO_BP_OC_ODONTOGENESIS_OF_DENTIN-CONTAINING_TOOTH	GO_BP_OC_ODONTOGENESIS_OF_DENTIN-CONTAINING_TOOTH		38	-0.467276	-1.05172	0.395693	1	1	2492	tags=21%, list=18%, signal=26%
GO_BP_OC_CELL_REDOX_HOMEOSTASIS	GO_BP_OC_CELL_REDOX_HOMEOSTASIS		37	-0.467856	-1.05093	0.408392	1	1	3696	tags=51%, list=27%, signal=70%
GO_BP_OC_CHLORIDE_TRANSPORT	GO_BP_OC_CHLORIDE_TRANSPORT		40	-0.455574	-1.04863	0.387838	1	1	1014	tags=10%, list=7%, signal=11%
GO_MF_OC_ATPASE_ACTIVITY_COUPLED_TO_TRANSMEMBRANE_MOVEMENT_OF_IONS_PHOSPHORYLATIVE_MECHANISM	GO_MF_OC_ATPASE_ACTIVITY_COUPLED_TO_TRANSMEMBRANE_MOVEMENT_OF_IONS_PHOSPHORYLATIVE_MECHANISM		29	-0.476962	-1.04853	0.424451	1	1	1421	tags=17%, list=10%, signal=19%
GO_BP_OC_RESPONSE_TO_GAMMA_RADIATION	GO_BP_OC_RESPONSE_TO_GAMMA_RADIATION		16	-0.527759	-1.04744	0.427035	1	1	5	tags=6%, list=0%, signal=6%
GO_BP_OC_LIMB_DEVELOPMENT	GO_BP_OC_LIMB_DEVELOPMENT		15	-0.539898	-1.0473	0.400958	1	1	3650	tags=40%, list=27%, signal=54%
GO_CC_OC_SOLUBLE_FRACTION	GO_CC_OC_SOLUBLE_FRACTION		56	-0.437968	-1.04648	0.401258	1	1	1282	tags=14%, list=9%, signal=16%
GO_CC_OC_MITOCHONDRIAL_MATRIX	GO_CC_OC_MITOCHONDRIAL_MATRIX		20	-0.502725	-1.0457	0.431611	1	1	43	tags=5%, list=0%, signal=5%
GO_CC_OC_ENDOPLASMIC_RETICULUM_MEMBRANE	GO_CC_OC_ENDOPLASMIC_RETICULUM_MEMBRANE		99	-0.410074	-1.0444	0.405213	1	1	2137	tags=17%, list=16%, signal=20%
GO_MF_OC_NUCLEOSIDE-TRIPHOSPHATASE_ACTIVITY	GO_MF_OC_NUCLEOSIDE-TRIPHOSPHATASE_ACTIVITY		175	-0.388873	-1.04416	0.385684	1	1	1145	tags=9%, list=8%, signal=9%
GO_BP_OC_EMBRYO_DEVELOPMENT	GO_BP_OC_EMBRYO_DEVELOPMENT		53	-0.435317	-1.04297	0.407552	1	1	2557	tags=25%, list=19%, signal=30%
GO_BP_OC_MOTOR_AXON_GUIDANCE	GO_BP_OC_MOTOR_AXON_GUIDANCE		15	-0.535576	-1.03912	0.460938	1	1	2594	tags=40%, list=19%, signal=49%
GO_BP_OC_ANATOMICAL_STRUCTURE_FORMATION_INVOLVED_IN_MORPHOGENESIS	GO_BP_OC_ANATOMICAL_STRUCTURE_FORMATION_INVOLVED_IN_MORPHOGENESIS		17	-0.522184	-1.03832	0.435704	1	1	1486	tags=24%, list=11%, signal=26%
GO_BP_OC_SMALL_GTPASE_MEDIATED_SIGNAL_TRANSDUCTION	GO_BP_OC_SMALL_GTPASE_MEDIATED_SIGNAL_TRANSDUCTION		160	-0.391285	-1.03791	0.410256	1	1	2561	tags=27%, list=19%, signal=33%
GO_MF_OC_G-PROTEIN_COUPLED_RECEPTOR_ACTIVITY	GO_MF_OC_G-PROTEIN_COUPLED_RECEPTOR_ACTIVITY		373	-0.369132	-1.03644	0.395349	1	1	2779	tags=11%, list=20%, signal=13%
GO_BP_OC_G2_M_TRANSITION_OF_MITOTIC_CELL_CYCLE	GO_BP_OC_G2_M_TRANSITION_OF_MITOTIC_CELL_CYCLE		17	-0.528781	-1.03511	0.447563	1	1	2546	tags=47%, list=18%, signal=58%
GO_BP_OC_REGULATION_OF_CYCLIN-DEPENDENT_PROTEIN_KINASE_ACTIVITY	GO_BP_OC_REGULATION_OF_CYCLIN-DEPENDENT_PROTEIN_KINASE_ACTIVITY		22	-0.505028	-1.03486	0.43472	1	1	1174	tags=14%, list=9%, signal=15%
GO_BP_OC_INNATE_IMMUNE_RESPONSE	GO_BP_OC_INNATE_IMMUNE_RESPONSE		28	-0.473979	-1.03285	0.435393	1	1	3081	tags=36%, list=22%, signal=46%
GO_BP_OC_NEGATIVE_REGULATION_OF_CELL_DIFFERENTIATION	GO_BP_OC_NEGATIVE_REGULATION_OF_CELL_DIFFERENTIATION		25	-0.477994	-1.02593	0.453102	1	1	2252	tags=20%, list=16%, signal=24%
GO_BP_OC_CELL_COMMUNICATION	GO_BP_OC_CELL_COMMUNICATION		78	-0.410097	-1.0252	0.435655	1	1	2963	tags=31%, list=22%, signal=39%
GO_BP_OC_SKELETAL_SYSTEM_MORPHOGENESIS	GO_BP_OC_SKELETAL_SYSTEM_MORPHOGENESIS		31	-0.469914	-1.02481	0.433242	1	1	2886	tags=45%, list=21%, signal=57%
GO_CC_OC_CYTOSKELETON	GO_CC_OC_CYTOSKELETON		112	-0.389861	-1.02325	0.438914	1	1	1422	tags=15%, list=10%, signal=17%
GO_MF_OC_HYDROLASE_ACTIVITY_ACTING_ON_ESTER_BONDS	GO_MF_OC_HYDROLASE_ACTIVITY_ACTING_ON_ESTER_BONDS		33	-0.45679	-1.0203	0.449728	1	1	710	tags=9%, list=5%, signal=10%
GO_BP_OC_LYSOSOME_ORGANIZATION	GO_BP_OC_LYSOSOME_ORGANIZATION		18	-0.503716	-1.01969	0.455371	1	1	3563	tags=50%, list=26%, signal=67%
GO_CC_OC_CYTOSOL	GO_CC_OC_CYTOSOL		347	-0.365799	-1.0185	0.458848	1	1	2520	tags=22%, list=18%, signal=26%
GO_BP_OC_NUCLEIC_ACID_PHOSPHODIESTER_BOND_HYDROLYSIS	GO_BP_OC_NUCLEIC_ACID_PHOSPHODIESTER_BOND_HYDROLYSIS		17	-0.517112	-1.01534	0.448023	1	1	267	tags=6%, list=2%, signal=6%
GO_CC_OC_RIBOSOME	GO_CC_OC_RIBOSOME		67	-0.416276	-1.01447	0.450439	1	1	3367	tags=48%, list=24%, signal=63%
GO_BP_OC_FACE_MORPHOGENESIS	GO_BP_OC_FACE_MORPHOGENESIS		20	-0.501197	-1.01324	0.497006	1	1	1486	tags=30%, list=11%, signal=34%
GO_CC_OC_VESICLE	GO_CC_OC_VESICLE		18	-0.503182	-1.0126	0.468182	1	1	498	tags=11%, list=4%, signal=12%
GO_MF_OC_GABA-A_RECEPTOR_ACTIVITY	GO_MF_OC_GABA-A_RECEPTOR_ACTIVITY		18	-0.500548	-1.00891	0.470229	1	1	192	tags=11%, list=1%, signal=11%
GO_MF_OC_NUCLEASE_ACTIVITY	GO_MF_OC_NUCLEASE_ACTIVITY		18	-0.508475	-1.00873	0.465409	1	1	267	tags=6%, list=2%, signal=6%
GO_CC_OC_MIDBODY	GO_CC_OC_MIDBODY		49	-0.430429	-1.00778	0.461133	1	1	2790	tags=31%, list=20%, signal=38%
GO_MF_OC_WNT-PROTEIN_BINDING	GO_MF_OC_WNT-PROTEIN_BINDING		16	-0.517606	-1.00743	0.490769	1	1	2104	tags=44%, list=15%, signal=52%
GO_BP_OC_NEURON_FATE_COMMITMENT	GO_BP_OC_NEURON_FATE_COMMITMENT		23	-0.480775	-1.00541	0.47093	1	1	1195	tags=13%, list=9%, signal=14%
GO_MF_OC_METALLOCARBOXYPEPTIDASE_ACTIVITY	GO_MF_OC_METALLOCARBOXYPEPTIDASE_ACTIVITY		17	-0.500267	-1.00524	0.48281	1	1	1617	tags=35%, list=12%, signal=40%
GO_MF_OC_ENDONUCLEASE_ACTIVITY	GO_MF_OC_ENDONUCLEASE_ACTIVITY		19	-0.498428	-1.00328	0.484115	1	1	2845	tags=32%, list=21%, signal=40%
GO_CC_OC_ENDOPLASMIC_RETICULUM	GO_CC_OC_ENDOPLASMIC_RETICULUM		321	-0.359745	-1.00205	0.485159	1	1	2453	tags=21%, list=18%, signal=24%
GO_MF_OC_TUMOR_NECROSIS_FACTOR_RECEPTOR_BINDING	GO_MF_OC_TUMOR_NECROSIS_FACTOR_RECEPTOR_BINDING		16	-0.502691	-1.00073	0.484352	1	1	1411	tags=19%, list=10%, signal=21%
GO_MF_OC_LIGAND-ACTIVATED_SEQUENCE-SPECIFIC_DNA_BINDING_RNA_POLYMERASE_II_TRANSCRIPTION_FACTOR_ACTIVITY	GO_MF_OC_LIGAND-ACTIVATED_SEQUENCE-SPECIFIC_DNA_BINDING_RNA_POLYMERASE_II_TRANSCRIPTION_FACTOR_ACTIVITY		19	-0.491768	-1.00036	0.495482	1	1	2447	tags=26%, list=18%, signal=32%
GO_MF_OC_CATION_BINDING	GO_MF_OC_CATION_BINDING		26	-0.465543	-0.999765	0.480226	1	1	2345	tags=31%, list=17%, signal=37%
GO_BP_OC_NEURON_DEVELOPMENT	GO_BP_OC_NEURON_DEVELOPMENT		25	-0.469304	-0.998059	0.473458	1	1	2730	tags=24%, list=20%, signal=30%
GO_CC_OC_GOLGI_APPARATUS	GO_CC_OC_GOLGI_APPARATUS		362	-0.356625	-0.996617	0.512295	1	1	1837	tags=16%, list=13%, signal=18%
GO_BP_OC_RESPONSE_TO_TOXIN	GO_BP_OC_RESPONSE_TO_TOXIN		28	-0.462594	-0.996279	0.496372	1	1	1703	tags=21%, list=12%, signal=24%
GO_BP_OC_INTRACELLULAR_RECEPTOR_MEDIATED_SIGNALING_PATHWAY	GO_BP_OC_INTRACELLULAR_RECEPTOR_MEDIATED_SIGNALING_PATHWAY		19	-0.491768	-0.995626	0.492958	1	1	2447	tags=26%, list=18%, signal=32%
GO_BP_OC_PROTEIN_HOMOTETRAMERIZATION	GO_BP_OC_PROTEIN_HOMOTETRAMERIZATION		25	-0.472703	-0.992861	0.489146	1	1	1215	tags=16%, list=9%, signal=18%
GO_BP_OC_VESICLE-MEDIATED_TRANSPORT	GO_BP_OC_VESICLE-MEDIATED_TRANSPORT		81	-0.397749	-0.992747	0.492159	1	1	2086	tags=19%, list=15%, signal=22%
GO_BP_OC_METABOLIC_PROCESS	GO_BP_OC_METABOLIC_PROCESS		422	-0.352057	-0.98995	0.533197	1	1	1444	tags=15%, list=10%, signal=16%
GO_BP_OC_POSITIVE_REGULATION_OF_NEURON_PROJECTION_DEVELOPMENT	GO_BP_OC_POSITIVE_REGULATION_OF_NEURON_PROJECTION_DEVELOPMENT		23	-0.476865	-0.989466	0.488636	1	1	2177	tags=39%, list=16%, signal=46%
GO_BP_OC_LUNG_DEVELOPMENT	GO_BP_OC_LUNG_DEVELOPMENT		62	-0.405152	-0.982687	0.508578	1	1	1505	tags=18%, list=11%, signal=20%
GO_BP_OC_POSITIVE_REGULATION_OF_CELL_ADHESION	GO_BP_OC_POSITIVE_REGULATION_OF_CELL_ADHESION		20	-0.468822	-0.982525	0.494269	1	1	1195	tags=30%, list=9%, signal=33%
GO_BP_OC_REGULATION_OF_BLOOD_PRESSURE	GO_BP_OC_REGULATION_OF_BLOOD_PRESSURE		20	-0.480115	-0.982119	0.515244	1	1	3430	tags=45%, list=25%, signal=60%
GO_MF_OC_ISOMERASE_ACTIVITY	GO_MF_OC_ISOMERASE_ACTIVITY		34	-0.434915	-0.977726	0.516393	1	1	2681	tags=35%, list=19%, signal=44%
GO_CC_OC_MICROTUBULE_CYTOSKELETON	GO_CC_OC_MICROTUBULE_CYTOSKELETON		67	-0.401462	-0.976817	0.520936	1	1	731	tags=9%, list=5%, signal=9%
GO_BP_OC_NEGATIVE_REGULATION_OF_CELL_MIGRATION	GO_BP_OC_NEGATIVE_REGULATION_OF_CELL_MIGRATION		42	-0.425261	-0.975918	0.518817	1	1	2390	tags=26%, list=17%, signal=32%
GO_BP_OC_LEARNING	GO_BP_OC_LEARNING		23	-0.467673	-0.973965	0.509231	1	1	538	tags=9%, list=4%, signal=9%
GO_MF_OC_ARF_GTPASE_ACTIVATOR_ACTIVITY	GO_MF_OC_ARF_GTPASE_ACTIVATOR_ACTIVITY		18	-0.481919	-0.9717	0.511346	1	1	2480	tags=39%, list=18%, signal=47%
GO_CC_OC_STRESS_FIBER	GO_CC_OC_STRESS_FIBER		31	-0.437454	-0.969817	0.522409	1	1	1367	tags=23%, list=10%, signal=25%
GO_BP_OC_REGULATION_OF_ARF_GTPASE_ACTIVITY	GO_BP_OC_REGULATION_OF_ARF_GTPASE_ACTIVITY		18	-0.481919	-0.966902	0.545052	1	1	2480	tags=39%, list=18%, signal=47%
GO_BP_OC_SENSORY_PERCEPTION_OF_SOUND	GO_BP_OC_SENSORY_PERCEPTION_OF_SOUND		66	-0.391489	-0.966463	0.541205	1	1	2759	tags=29%, list=20%, signal=36%
GO_BP_OC_ACTIN_CYTOSKELETON_REORGANIZATION	GO_BP_OC_ACTIN_CYTOSKELETON_REORGANIZATION		21	-0.471708	-0.965366	0.51363	1	1	1761	tags=19%, list=13%, signal=22%
GO_BP_OC_INDUCTION_OF_APOPTOSIS	GO_BP_OC_INDUCTION_OF_APOPTOSIS		84	-0.38471	-0.9644	0.544497	1	1	2923	tags=37%, list=21%, signal=47%
GO_MF_OC_TRANSMEMBRANE_RECEPTOR_PROTEIN_TYROSINE_KINASE_ACTIVITY	GO_MF_OC_TRANSMEMBRANE_RECEPTOR_PROTEIN_TYROSINE_KINASE_ACTIVITY		29	-0.448577	-0.962614	0.52984	1	1	1045	tags=21%, list=8%, signal=22%
GO_BP_OC_METANEPHROS_DEVELOPMENT	GO_BP_OC_METANEPHROS_DEVELOPMENT		31	-0.43463	-0.960598	0.546703	1	1	3584	tags=42%, list=26%, signal=57%
GO_MF_OC_CYSTEINE-TYPE_ENDOPEPTIDASE_ACTIVITY	GO_MF_OC_CYSTEINE-TYPE_ENDOPEPTIDASE_ACTIVITY		23	-0.459414	-0.960206	0.538799	1	1	581	tags=13%, list=4%, signal=14%
GO_BP_OC_NEGATIVE_REGULATION_OF_CANONICAL_WNT_RECEPTOR_SIGNALING_PATHWAY	GO_BP_OC_NEGATIVE_REGULATION_OF_CANONICAL_WNT_RECEPTOR_SIGNALING_PATHWAY		55	-0.406772	-0.959959	0.557644	1	1	2670	tags=35%, list=19%, signal=43%
GO_BP_OC_POSITIVE_REGULATION_OF_MITOSIS	GO_BP_OC_POSITIVE_REGULATION_OF_MITOSIS		16	-0.490997	-0.957206	0.544765	1	1	2761	tags=38%, list=20%, signal=47%
GO_BP_OC_POSITIVE_REGULATION_OF_PROTEIN_KINASE_B_SIGNALING_CASCADE	GO_BP_OC_POSITIVE_REGULATION_OF_PROTEIN_KINASE_B_SIGNALING_CASCADE		42	-0.416966	-0.956571	0.538564	1	1	1495	tags=21%, list=11%, signal=24%
GO_BP_OC_PROTEIN_AUTOPHOSPHORYLATION	GO_BP_OC_PROTEIN_AUTOPHOSPHORYLATION		97	-0.378525	-0.955798	0.567232	1	1	2529	tags=26%, list=18%, signal=31%
GO_BP_OC_PIGMENTATION	GO_BP_OC_PIGMENTATION		25	-0.449344	-0.954905	0.540311	1	1	2096	tags=24%, list=15%, signal=28%
GO_MF_OC_HEPARIN_BINDING	GO_MF_OC_HEPARIN_BINDING		47	-0.40223	-0.954572	0.56129	1	1	459	tags=11%, list=3%, signal=11%
GO_BP_OC_REGULATION_OF_CELL_PROLIFERATION	GO_BP_OC_REGULATION_OF_CELL_PROLIFERATION		78	-0.383115	-0.9519	0.552347	1	1	1803	tags=18%, list=13%, signal=21%
GO_BP_OC_POSITIVE_REGULATION_OF_PROTEIN_KINASE_ACTIVITY	GO_BP_OC_POSITIVE_REGULATION_OF_PROTEIN_KINASE_ACTIVITY		30	-0.435255	-0.950882	0.546463	1	1	2619	tags=33%, list=19%, signal=41%
GO_MF_OC_EPHRIN_RECEPTOR_BINDING	GO_MF_OC_EPHRIN_RECEPTOR_BINDING		17	-0.484637	-0.950784	0.558997	1	1	3508	tags=53%, list=25%, signal=71%
GO_BP_OC_CELLULAR_RESPONSE_TO_TRANSFORMING_GROWTH_FACTOR_BETA_STIMULUS	GO_BP_OC_CELLULAR_RESPONSE_TO_TRANSFORMING_GROWTH_FACTOR_BETA_STIMULUS		18	-0.473307	-0.950063	0.54908	1	1	2312	tags=44%, list=17%, signal=53%
GO_BP_OC_POSITIVE_REGULATION_OF_SEQUENCE-SPECIFIC_DNA_BINDING_TRANSCRIPTION_FACTOR_ACTIVITY	GO_BP_OC_POSITIVE_REGULATION_OF_SEQUENCE-SPECIFIC_DNA_BINDING_TRANSCRIPTION_FACTOR_ACTIVITY		47	-0.4075	-0.948952	0.56599	1	1	2965	tags=32%, list=22%, signal=41%
GO_BP_OC_NEGATIVE_REGULATION_OF_NEURON_APOPTOTIC_PROCESS	GO_BP_OC_NEGATIVE_REGULATION_OF_NEURON_APOPTOTIC_PROCESS		56	-0.394443	-0.948173	0.58239	1	1	1379	tags=14%, list=10%, signal=16%
GO_MF_OC_PHOSPHATASE_BINDING	GO_MF_OC_PHOSPHATASE_BINDING		26	-0.44182	-0.94794	0.563422	1	1	2551	tags=35%, list=19%, signal=42%
GO_BP_OC_REACTIVE_OXYGEN_SPECIES_METABOLIC_PROCESS	GO_BP_OC_REACTIVE_OXYGEN_SPECIES_METABOLIC_PROCESS		15	-0.49689	-0.94764	0.550152	1	1	500	tags=13%, list=4%, signal=14%
GO_BP_OC_AXON_GUIDANCE	GO_BP_OC_AXON_GUIDANCE		81	-0.37753	-0.946801	0.586877	1	1	3463	tags=31%, list=25%, signal=41%
GO_CC_OC_EXTERNAL_SIDE_OF_PLASMA_MEMBRANE	GO_CC_OC_EXTERNAL_SIDE_OF_PLASMA_MEMBRANE		116	-0.365511	-0.944335	0.594564	1	1	1957	tags=18%, list=14%, signal=21%
GO_CC_OC_CELL_PROJECTION	GO_CC_OC_CELL_PROJECTION		26	-0.441314	-0.943942	0.548523	1	1	1790	tags=27%, list=13%, signal=31%
GO_BP_OC_POSITIVE_REGULATION_OF_T_CELL_PROLIFERATION	GO_BP_OC_POSITIVE_REGULATION_OF_T_CELL_PROLIFERATION		30	-0.431317	-0.943172	0.570225	1	1	2430	tags=27%, list=18%, signal=32%
GO_MF_OC_PYRIDOXAL_PHOSPHATE_BINDING	GO_MF_OC_PYRIDOXAL_PHOSPHATE_BINDING		45	-0.406996	-0.941776	0.566327	1	1	2214	tags=24%, list=16%, signal=29%
GO_BP_OC_POSITIVE_REGULATION_OF_I-KAPPAB_KINASE_NF-KAPPAB_CASCADE	GO_BP_OC_POSITIVE_REGULATION_OF_I-KAPPAB_KINASE_NF-KAPPAB_CASCADE		86	-0.37617	-0.941361	0.597122	1	1	2933	tags=36%, list=21%, signal=46%
GO_BP_OC_NEGATIVE_REGULATION_OF_CYSTEINE-TYPE_ENDOPEPTIDASE_ACTIVITY_INVOLVED_IN_APOPTOTIC_PROCESS	GO_BP_OC_NEGATIVE_REGULATION_OF_CYSTEINE-TYPE_ENDOPEPTIDASE_ACTIVITY_INVOLVED_IN_APOPTOTIC_PROCESS		32	-0.420799	-0.93894	0.57377	1	1	2191	tags=31%, list=16%, signal=37%
GO_MF_OC_PROTEIN_HOMODIMERIZATION_ACTIVITY	GO_MF_OC_PROTEIN_HOMODIMERIZATION_ACTIVITY		305	-0.339533	-0.936967	0.666667	1	1	2345	tags=21%, list=17%, signal=24%
GO_MF_OC_PROTEIN_C-TERMINUS_BINDING	GO_MF_OC_PROTEIN_C-TERMINUS_BINDING		86	-0.372079	-0.936049	0.587604	1	1	1721	tags=13%, list=13%, signal=15%
GO_BP_OC_POSITIVE_REGULATION_OF_CYSTEINE-TYPE_ENDOPEPTIDASE_ACTIVITY_INVOLVED_IN_APOPTOTIC_PROCESS	GO_BP_OC_POSITIVE_REGULATION_OF_CYSTEINE-TYPE_ENDOPEPTIDASE_ACTIVITY_INVOLVED_IN_APOPTOTIC_PROCESS		16	-0.470523	-0.935716	0.568938	1	1	1993	tags=25%, list=14%, signal=29%
GO_MF_OC_IDENTICAL_PROTEIN_BINDING	GO_MF_OC_IDENTICAL_PROTEIN_BINDING		194	-0.346435	-0.934554	0.650054	1	1	2594	tags=29%, list=19%, signal=35%
GO_MF_OC_CARBOXYPEPTIDASE_ACTIVITY	GO_MF_OC_CARBOXYPEPTIDASE_ACTIVITY		15	-0.48714	-0.933993	0.578052	1	1	1165	tags=20%, list=8%, signal=22%
GO_MF_OC_COPPER_ION_BINDING	GO_MF_OC_COPPER_ION_BINDING		32	-0.423938	-0.93321	0.571035	1	1	1197	tags=19%, list=9%, signal=20%
GO_MF_OC_INTEGRIN_BINDING	GO_MF_OC_INTEGRIN_BINDING		26	-0.440406	-0.931598	0.574074	1	1	1899	tags=31%, list=14%, signal=36%
GO_BP_OC_NEGATIVE_REGULATION_OF_PROTEIN_PHOSPHORYLATION	GO_BP_OC_NEGATIVE_REGULATION_OF_PROTEIN_PHOSPHORYLATION		17	-0.469722	-0.929056	0.589474	1	1	712	tags=12%, list=5%, signal=12%
GO_BP_OC_ELEVATION_OF_CYTOSOLIC_CALCIUM_ION_CONCENTRATION	GO_BP_OC_ELEVATION_OF_CYTOSOLIC_CALCIUM_ION_CONCENTRATION		23	-0.443681	-0.928653	0.571225	1	1	1743	tags=22%, list=13%, signal=25%
GO_BP_OC_BROWN_FAT_CELL_DIFFERENTIATION	GO_BP_OC_BROWN_FAT_CELL_DIFFERENTIATION		21	-0.450735	-0.926445	0.578313	1	1	3057	tags=48%, list=22%, signal=61%
GO_MF_OC_PROTEIN_TYROSINE_KINASE_ACTIVITY	GO_MF_OC_PROTEIN_TYROSINE_KINASE_ACTIVITY		369	-0.330942	-0.924527	0.699187	1	1	2131	tags=21%, list=15%, signal=24%
GO_MF_OC_SULFOTRANSFERASE_ACTIVITY	GO_MF_OC_SULFOTRANSFERASE_ACTIVITY		30	-0.419786	-0.924465	0.578231	1	1	4115	tags=43%, list=30%, signal=62%
GO_MF_OC_RAB_GTPASE_ACTIVATOR_ACTIVITY	GO_MF_OC_RAB_GTPASE_ACTIVATOR_ACTIVITY		33	-0.414229	-0.923876	0.605674	1	1	3847	tags=52%, list=28%, signal=71%
GO_CC_OC_CENTRIOLE	GO_CC_OC_CENTRIOLE		30	-0.421981	-0.923247	0.605452	1	1	1340	tags=17%, list=10%, signal=18%
GO_BP_OC_PHOSPHORYLATION	GO_BP_OC_PHOSPHORYLATION		215	-0.334417	-0.920674	0.671321	1	1	1192	tags=13%, list=9%, signal=15%
GO_BP_OC_NEUROTRANSMITTER_TRANSPORT	GO_BP_OC_NEUROTRANSMITTER_TRANSPORT		19	-0.451592	-0.91855	0.581538	1	1	2333	tags=32%, list=17%, signal=38%
GO_BP_OC_POSITIVE_REGULATION_OF_RAB_GTPASE_ACTIVITY	GO_BP_OC_POSITIVE_REGULATION_OF_RAB_GTPASE_ACTIVITY		33	-0.414229	-0.918301	0.602778	1	1	3847	tags=52%, list=28%, signal=71%
GO_BP_OC_POSITIVE_REGULATION_OF_EPITHELIAL_CELL_PROLIFERATION	GO_BP_OC_POSITIVE_REGULATION_OF_EPITHELIAL_CELL_PROLIFERATION		34	-0.415566	-0.917634	0.587106	1	1	2594	tags=38%, list=19%, signal=47%
GO_MF_OC_ION_CHANNEL_BINDING	GO_MF_OC_ION_CHANNEL_BINDING		18	-0.459778	-0.917354	0.596923	1	1	2155	tags=33%, list=16%, signal=39%
GO_MF_OC_GUANYL-NUCLEOTIDE_EXCHANGE_FACTOR_ACTIVITY	GO_MF_OC_GUANYL-NUCLEOTIDE_EXCHANGE_FACTOR_ACTIVITY		64	-0.375244	-0.916604	0.640151	1	1	2248	tags=30%, list=16%, signal=35%
GO_BP_OC_CELL_FATE_COMMITMENT	GO_BP_OC_CELL_FATE_COMMITMENT		39	-0.3993	-0.916583	0.583893	1	1	998	tags=13%, list=7%, signal=14%
GO_BP_OC_BLOOD_VESSEL_DEVELOPMENT	GO_BP_OC_BLOOD_VESSEL_DEVELOPMENT		40	-0.398021	-0.915639	0.604681	1	1	1844	tags=25%, list=13%, signal=29%
GO_BP_OC_ANGIOGENESIS	GO_BP_OC_ANGIOGENESIS		84	-0.366617	-0.915214	0.646635	1	1	1137	tags=13%, list=8%, signal=14%
GO_MF_OC_KINASE_ACTIVITY	GO_MF_OC_KINASE_ACTIVITY		219	-0.336639	-0.914459	0.691254	1	1	1192	tags=14%, list=9%, signal=15%
GO_CC_OC_MEMBRANE_RAFT	GO_CC_OC_MEMBRANE_RAFT		59	-0.373829	-0.912985	0.610553	1	1	2751	tags=24%, list=20%, signal=30%
GO_MF_OC_MRNA_BINDING	GO_MF_OC_MRNA_BINDING		31	-0.418089	-0.911739	0.599721	1	1	272	tags=6%, list=2%, signal=7%
GO_BP_OC_POSITIVE_REGULATION_OF_ENDOTHELIAL_CELL_PROLIFERATION	GO_BP_OC_POSITIVE_REGULATION_OF_ENDOTHELIAL_CELL_PROLIFERATION		25	-0.424814	-0.910857	0.59824	1	1	998	tags=20%, list=7%, signal=22%
GO_CC_OC_SYNAPTOSOME	GO_CC_OC_SYNAPTOSOME		35	-0.406134	-0.910726	0.619813	1	1	1197	tags=11%, list=9%, signal=12%
GO_MF_OC_CYTOSKELETAL_PROTEIN_BINDING	GO_MF_OC_CYTOSKELETAL_PROTEIN_BINDING		39	-0.395989	-0.910458	0.592443	1	1	1111	tags=21%, list=8%, signal=22%
GO_BP_OC_NEGATIVE_REGULATION_OF_CELL_PROLIFERATION	GO_BP_OC_NEGATIVE_REGULATION_OF_CELL_PROLIFERATION		177	-0.335503	-0.909714	0.683572	1	1	2586	tags=24%, list=19%, signal=30%
GO_BP_OC_ENDODERM_DEVELOPMENT	GO_BP_OC_ENDODERM_DEVELOPMENT		17	-0.458612	-0.909698	0.597264	1	1	672	tags=12%, list=5%, signal=12%
GO_MF_OC_PEPTIDYL-PROLYL_CIS-TRANS_ISOMERASE_ACTIVITY	GO_MF_OC_PEPTIDYL-PROLYL_CIS-TRANS_ISOMERASE_ACTIVITY		17	-0.457726	-0.909109	0.619048	1	1	3100	tags=41%, list=23%, signal=53%
GO_BP_OC_TRANSLATION	GO_BP_OC_TRANSLATION		101	-0.352127	-0.907714	0.664692	1	1	2861	tags=33%, list=21%, signal=41%
GO_BP_OC_MELANOCYTE_DIFFERENTIATION	GO_BP_OC_MELANOCYTE_DIFFERENTIATION		16	-0.460433	-0.906594	0.622465	1	1	1648	tags=38%, list=12%, signal=43%
GO_BP_OC_PROTEIN_CATABOLIC_PROCESS	GO_BP_OC_PROTEIN_CATABOLIC_PROCESS		20	-0.440787	-0.906582	0.598473	1	1	2215	tags=25%, list=16%, signal=30%
GO_MF_OC_DNA-DEPENDENT_ATPASE_ACTIVITY	GO_MF_OC_DNA-DEPENDENT_ATPASE_ACTIVITY		18	-0.457445	-0.905826	0.612462	1	1	3435	tags=39%, list=25%, signal=52%
GO_BP_OC_PROTEIN_PEPTIDYL-PROLYL_ISOMERIZATION	GO_BP_OC_PROTEIN_PEPTIDYL-PROLYL_ISOMERIZATION		17	-0.457726	-0.905628	0.603687	1	1	3100	tags=41%, list=23%, signal=53%
GO_MF_OC_METALLOENDOPEPTIDASE_ACTIVITY	GO_MF_OC_METALLOENDOPEPTIDASE_ACTIVITY		82	-0.361345	-0.905051	0.642857	1	1	1737	tags=23%, list=13%, signal=26%
GO_MF_OC_TRANSFERASE_ACTIVITY_TRANSFERRING_PHOSPHORUS-CONTAINING_GROUPS	GO_MF_OC_TRANSFERASE_ACTIVITY_TRANSFERRING_PHOSPHORUS-CONTAINING_GROUPS		416	-0.323944	-0.904568	0.790061	1	1	2131	tags=20%, list=15%, signal=23%
GO_CC_OC_SECRETORY_GRANULE	GO_CC_OC_SECRETORY_GRANULE		35	-0.403695	-0.903933	0.619756	1	1	2450	tags=29%, list=18%, signal=35%
GO_MF_OC_SH2_DOMAIN_BINDING	GO_MF_OC_SH2_DOMAIN_BINDING		20	-0.443605	-0.903365	0.593939	1	1	2306	tags=25%, list=17%, signal=30%
GO_BP_OC_DNA_REPLICATION	GO_BP_OC_DNA_REPLICATION		58	-0.372168	-0.902827	0.647134	1	1	2873	tags=24%, list=21%, signal=30%
GO_BP_OC_INTEGRIN-MEDIATED_SIGNALING_PATHWAY	GO_BP_OC_INTEGRIN-MEDIATED_SIGNALING_PATHWAY		39	-0.393688	-0.898018	0.647139	1	1	1899	tags=23%, list=14%, signal=27%
GO_MF_OC_PROTEIN_PHOSPHATASE_BINDING	GO_MF_OC_PROTEIN_PHOSPHATASE_BINDING		30	-0.409279	-0.89628	0.61669	1	1	2594	tags=30%, list=19%, signal=37%
GO_BP_OC_SODIUM_ION_TRANSMEMBRANE_TRANSPORT	GO_BP_OC_SODIUM_ION_TRANSMEMBRANE_TRANSPORT		20	-0.440067	-0.892391	0.633436	1	1	795	tags=15%, list=6%, signal=16%
GO_BP_OC_NEURON_PROJECTION_DEVELOPMENT	GO_BP_OC_NEURON_PROJECTION_DEVELOPMENT		45	-0.377382	-0.892299	0.643693	1	1	2635	tags=29%, list=19%, signal=36%
GO_BP_OC_POSITIVE_REGULATION_OF_CELL_PROLIFERATION	GO_BP_OC_POSITIVE_REGULATION_OF_CELL_PROLIFERATION		189	-0.328763	-0.89213	0.72103	1	1	1862	tags=14%, list=14%, signal=16%
GO_CC_OC_INTEGRIN_COMPLEX	GO_CC_OC_INTEGRIN_COMPLEX		25	-0.426209	-0.891932	0.645804	1	1	2222	tags=32%, list=16%, signal=38%
GO_CC_OC_INTERNAL_SIDE_OF_PLASMA_MEMBRANE	GO_CC_OC_INTERNAL_SIDE_OF_PLASMA_MEMBRANE		19	-0.435984	-0.885738	0.626488	1	1	666	tags=21%, list=5%, signal=22%
GO_BP_OC_NEGATIVE_REGULATION_OF_CELL_GROWTH	GO_BP_OC_NEGATIVE_REGULATION_OF_CELL_GROWTH		62	-0.366184	-0.884034	0.670025	1	1	1328	tags=16%, list=10%, signal=18%
GO_MF_OC_HYDROLASE_ACTIVITY_HYDROLYZING_O-GLYCOSYL_COMPOUNDS	GO_MF_OC_HYDROLASE_ACTIVITY_HYDROLYZING_O-GLYCOSYL_COMPOUNDS		24	-0.423018	-0.883568	0.641026	1	1	2345	tags=29%, list=17%, signal=35%
GO_BP_OC_RESPONSE_TO_STRESS	GO_BP_OC_RESPONSE_TO_STRESS		44	-0.377814	-0.8821	0.660403	1	1	774	tags=7%, list=6%, signal=7%
GO_CC_OC_RECYCLING_ENDOSOME	GO_CC_OC_RECYCLING_ENDOSOME		18	-0.449116	-0.881154	0.655118	1	1	4180	tags=50%, list=30%, signal=72%
GO_MF_OC_PROTEIN_KINASE_ACTIVITY	GO_MF_OC_PROTEIN_KINASE_ACTIVITY		407	-0.316208	-0.880011	0.832998	1	1	2594	tags=24%, list=19%, signal=28%
GO_BP_OC_FATTY_ACID_BETA-OXIDATION	GO_BP_OC_FATTY_ACID_BETA-OXIDATION		16	-0.446728	-0.878615	0.647416	1	1	54	tags=6%, list=0%, signal=6%
GO_BP_OC_URETERIC_BUD_DEVELOPMENT	GO_BP_OC_URETERIC_BUD_DEVELOPMENT		31	-0.405038	-0.878417	0.674581	1	1	1855	tags=19%, list=13%, signal=22%
GO_BP_OC_WOUND_HEALING	GO_BP_OC_WOUND_HEALING		25	-0.410868	-0.878298	0.673469	1	1	1192	tags=16%, list=9%, signal=17%
GO_BP_OC_REGULATION_OF_RNA_SPLICING	GO_BP_OC_REGULATION_OF_RNA_SPLICING		17	-0.439762	-0.876205	0.642527	1	1	272	tags=12%, list=2%, signal=12%
GO_CC_OC_NEURONAL_CELL_BODY	GO_CC_OC_NEURONAL_CELL_BODY		84	-0.347083	-0.875437	0.705952	1	1	1422	tags=11%, list=10%, signal=12%
GO_CC_OC_SARCOLEMMA	GO_CC_OC_SARCOLEMMA		27	-0.400427	-0.874193	0.681885	1	1	1267	tags=19%, list=9%, signal=20%
GO_BP_OC_REGULATION_OF_CELL_SHAPE	GO_BP_OC_REGULATION_OF_CELL_SHAPE		54	-0.365219	-0.871181	0.691816	1	1	2407	tags=26%, list=17%, signal=31%
GO_BP_OC_HIPPOCAMPUS_DEVELOPMENT	GO_BP_OC_HIPPOCAMPUS_DEVELOPMENT		23	-0.41527	-0.870716	0.663366	1	1	1247	tags=9%, list=9%, signal=10%
GO_BP_OC_EMBRYONIC_LIMB_MORPHOGENESIS	GO_BP_OC_EMBRYONIC_LIMB_MORPHOGENESIS		43	-0.378398	-0.870109	0.676431	1	1	3617	tags=40%, list=26%, signal=53%
GO_BP_OC_NEGATIVE_REGULATION_OF_PROTEIN_CATABOLIC_PROCESS	GO_BP_OC_NEGATIVE_REGULATION_OF_PROTEIN_CATABOLIC_PROCESS		15	-0.445952	-0.868456	0.661859	1	1	1963	tags=33%, list=14%, signal=39%
GO_BP_OC_CELLULAR_RESPONSE_TO_GROWTH_FACTOR_STIMULUS	GO_BP_OC_CELLULAR_RESPONSE_TO_GROWTH_FACTOR_STIMULUS		18	-0.429468	-0.865359	0.671779	1	1	2769	tags=39%, list=20%, signal=49%
GO_BP_OC_CELL_SURFACE_RECEPTOR_SIGNALING_PATHWAY	GO_BP_OC_CELL_SURFACE_RECEPTOR_SIGNALING_PATHWAY		69	-0.351977	-0.864458	0.71677	1	1	1491	tags=13%, list=11%, signal=15%
GO_MF_OC_TRANSCRIPTION_COACTIVATOR_ACTIVITY	GO_MF_OC_TRANSCRIPTION_COACTIVATOR_ACTIVITY		96	-0.337365	-0.860173	0.746445	1	1	2979	tags=21%, list=22%, signal=26%
GO_BP_OC_LIPID_CATABOLIC_PROCESS	GO_BP_OC_LIPID_CATABOLIC_PROCESS		24	-0.407232	-0.857797	0.673529	1	1	1474	tags=17%, list=11%, signal=19%
GO_BP_OC_POSITIVE_REGULATION_OF_JNK_CASCADE	GO_BP_OC_POSITIVE_REGULATION_OF_JNK_CASCADE		33	-0.38636	-0.852637	0.664812	1	1	1696	tags=27%, list=12%, signal=31%
GO_BP_OC_CYTOKINE-MEDIATED_SIGNALING_PATHWAY	GO_BP_OC_CYTOKINE-MEDIATED_SIGNALING_PATHWAY		45	-0.362575	-0.852346	0.705405	1	1	1963	tags=24%, list=14%, signal=28%
GO_BP_OC_LEUKOCYTE_CELL-CELL_ADHESION	GO_BP_OC_LEUKOCYTE_CELL-CELL_ADHESION		18	-0.416309	-0.851349	0.679049	1	1	190	tags=6%, list=1%, signal=6%
GO_MF_OC_COLLAGEN_BINDING	GO_MF_OC_COLLAGEN_BINDING		19	-0.411535	-0.849582	0.670229	1	1	1844	tags=26%, list=13%, signal=30%
GO_BP_OC_INTRACELLULAR_PROTEIN_KINASE_CASCADE	GO_BP_OC_INTRACELLULAR_PROTEIN_KINASE_CASCADE		42	-0.364778	-0.849254	0.712062	1	1	1539	tags=19%, list=11%, signal=21%
GO_BP_OC_ION_TRANSPORT	GO_BP_OC_ION_TRANSPORT		224	-0.308913	-0.848426	0.812965	1	1	1918	tags=12%, list=14%, signal=14%
GO_BP_OC_REGULATION_OF_EXCITATORY_POSTSYNAPTIC_MEMBRANE_POTENTIAL	GO_BP_OC_REGULATION_OF_EXCITATORY_POSTSYNAPTIC_MEMBRANE_POTENTIAL		17	-0.435489	-0.84793	0.701337	1	1	1918	tags=18%, list=14%, signal=20%
GO_BP_OC_PROTEIN_PHOSPHORYLATION	GO_BP_OC_PROTEIN_PHOSPHORYLATION		451	-0.300963	-0.846653	0.882591	1	1	2131	tags=19%, list=15%, signal=22%
GO_BP_OC_POSITIVE_REGULATION_OF_BONE_MINERALIZATION	GO_BP_OC_POSITIVE_REGULATION_OF_BONE_MINERALIZATION		21	-0.419978	-0.846406	0.679325	1	1	2557	tags=33%, list=19%, signal=41%
GO_BP_OC_HAIR_FOLLICLE_DEVELOPMENT	GO_BP_OC_HAIR_FOLLICLE_DEVELOPMENT		32	-0.385663	-0.844976	0.70725	1	1	1471	tags=19%, list=11%, signal=21%
GO_BP_OC_NEGATIVE_REGULATION_OF_CELL_ADHESION	GO_BP_OC_NEGATIVE_REGULATION_OF_CELL_ADHESION		17	-0.427976	-0.844779	0.686728	1	1	533	tags=18%, list=4%, signal=18%
GO_MF_OC_PROTEIN_DOMAIN_SPECIFIC_BINDING	GO_MF_OC_PROTEIN_DOMAIN_SPECIFIC_BINDING		77	-0.338442	-0.844503	0.756213	1	1	3167	tags=31%, list=23%, signal=40%
GO_CC_OC_SYNAPSE	GO_CC_OC_SYNAPSE		95	-0.331222	-0.844298	0.75406	1	1	1195	tags=11%, list=9%, signal=11%
GO_MF_OC_ION_CHANNEL_ACTIVITY	GO_MF_OC_ION_CHANNEL_ACTIVITY		188	-0.311327	-0.843417	0.790822	1	1	1918	tags=12%, list=14%, signal=14%
GO_BP_OC_NEURAL_CREST_CELL_MIGRATION	GO_BP_OC_NEURAL_CREST_CELL_MIGRATION		24	-0.400418	-0.84156	0.706997	1	1	3386	tags=42%, list=25%, signal=55%
GO_BP_OC_REGULATION_OF_MULTICELLULAR_ORGANISM_GROWTH	GO_BP_OC_REGULATION_OF_MULTICELLULAR_ORGANISM_GROWTH		22	-0.408614	-0.841313	0.693295	1	1	355	tags=9%, list=3%, signal=9%
GO_CC_OC_INTRACELLULAR_MEMBRANE-BOUNDED_ORGANELLE	GO_CC_OC_INTRACELLULAR_MEMBRANE-BOUNDED_ORGANELLE		204	-0.308022	-0.84115	0.826552	1	1	2752	tags=22%, list=20%, signal=27%
GO_MF_OC_METALLOPEPTIDASE_ACTIVITY	GO_MF_OC_METALLOPEPTIDASE_ACTIVITY		77	-0.342229	-0.841069	0.758788	1	1	1737	tags=26%, list=13%, signal=30%
GO_BP_OC_ER-ASSOCIATED_PROTEIN_CATABOLIC_PROCESS	GO_BP_OC_ER-ASSOCIATED_PROTEIN_CATABOLIC_PROCESS		19	-0.421547	-0.840684	0.687976	1	1	1864	tags=21%, list=14%, signal=24%
GO_CC_OC_RUFFLE_MEMBRANE	GO_CC_OC_RUFFLE_MEMBRANE		21	-0.410919	-0.840363	0.675	1	1	3412	tags=48%, list=25%, signal=63%
GO_BP_OC_REGULATION_OF_ACTIN_CYTOSKELETON_ORGANIZATION	GO_BP_OC_REGULATION_OF_ACTIN_CYTOSKELETON_ORGANIZATION		16	-0.432735	-0.836182	0.703762	1	1	1104	tags=13%, list=8%, signal=14%
GO_MF_OC_SIGNAL_TRANSDUCER_ACTIVITY	GO_MF_OC_SIGNAL_TRANSDUCER_ACTIVITY		478	-0.298162	-0.835847	0.906344	1	1	2933	tags=14%, list=21%, signal=17%
GO_BP_OC_CARBOHYDRATE_METABOLIC_PROCESS	GO_BP_OC_CARBOHYDRATE_METABOLIC_PROCESS		102	-0.326601	-0.835654	0.771727	1	1	2186	tags=20%, list=16%, signal=23%
GO_BP_OC_NEGATIVE_REGULATION_OF_SEQUENCE-SPECIFIC_DNA_BINDING_TRANSCRIPTION_FACTOR_ACTIVITY	GO_BP_OC_NEGATIVE_REGULATION_OF_SEQUENCE-SPECIFIC_DNA_BINDING_TRANSCRIPTION_FACTOR_ACTIVITY		35	-0.375239	-0.835343	0.721918	1	1	1872	tags=20%, list=14%, signal=23%
GO_BP_OC_REGULATION_OF_SIGNAL_TRANSDUCTION	GO_BP_OC_REGULATION_OF_SIGNAL_TRANSDUCTION		19	-0.405009	-0.834843	0.714286	1	1	3092	tags=37%, list=22%, signal=47%
GO_BP_OC_CARTILAGE_DEVELOPMENT	GO_BP_OC_CARTILAGE_DEVELOPMENT		42	-0.361579	-0.83432	0.742667	1	1	2138	tags=26%, list=16%, signal=31%
GO_BP_OC_REGULATION_OF_RAB_GTPASE_ACTIVITY	GO_BP_OC_REGULATION_OF_RAB_GTPASE_ACTIVITY		33	-0.372693	-0.834289	0.721154	1	1	3847	tags=48%, list=28%, signal=67%
GO_BP_OC_OSTEOCLAST_DIFFERENTIATION	GO_BP_OC_OSTEOCLAST_DIFFERENTIATION		15	-0.42975	-0.834041	0.697108	1	1	515	tags=13%, list=4%, signal=14%
GO_BP_OC_REGULATION_OF_APOPTOTIC_PROCESS	GO_BP_OC_REGULATION_OF_APOPTOTIC_PROCESS		90	-0.328993	-0.83345	0.779236	1	1	3193	tags=31%, list=23%, signal=40%
GO_BP_OC_CENTRAL_NERVOUS_SYSTEM_DEVELOPMENT	GO_BP_OC_CENTRAL_NERVOUS_SYSTEM_DEVELOPMENT		44	-0.360868	-0.831127	0.740385	1	1	591	tags=9%, list=4%, signal=9%
GO_BP_OC_NEGATIVE_REGULATION_OF_ENDOTHELIAL_CELL_PROLIFERATION	GO_BP_OC_NEGATIVE_REGULATION_OF_ENDOTHELIAL_CELL_PROLIFERATION		17	-0.41703	-0.831001	0.687683	1	1	139	tags=6%, list=1%, signal=6%
GO_CC_OC_PHOTORECEPTOR_OUTER_SEGMENT	GO_CC_OC_PHOTORECEPTOR_OUTER_SEGMENT		20	-0.405566	-0.829147	0.710448	1	1	1011	tags=10%, list=7%, signal=11%
GO_CC_OC_SYNAPTIC_VESICLE	GO_CC_OC_SYNAPTIC_VESICLE		36	-0.366994	-0.827157	0.728412	1	1	1629	tags=17%, list=12%, signal=19%
GO_MF_OC_PROTEIN_KINASE_BINDING	GO_MF_OC_PROTEIN_KINASE_BINDING		151	-0.309907	-0.826507	0.822813	1	1	3027	tags=28%, list=22%, signal=35%
GO_BP_OC_CELL_MIGRATION	GO_BP_OC_CELL_MIGRATION		71	-0.333258	-0.826501	0.768772	1	1	1195	tags=14%, list=9%, signal=15%
GO_BP_OC_MALE_GONAD_DEVELOPMENT	GO_BP_OC_MALE_GONAD_DEVELOPMENT		40	-0.362583	-0.826371	0.75848	1	1	2246	tags=23%, list=16%, signal=27%
GO_BP_OC_NEUROMUSCULAR_PROCESS_CONTROLLING_BALANCE	GO_BP_OC_NEUROMUSCULAR_PROCESS_CONTROLLING_BALANCE		27	-0.390344	-0.826084	0.724576	1	1	799	tags=7%, list=6%, signal=8%
GO_BP_OC_RRNA_PROCESSING	GO_BP_OC_RRNA_PROCESSING		24	-0.39339	-0.824707	0.72191	1	1	3212	tags=33%, list=23%, signal=43%
GO_CC_OC_PEROXISOME	GO_CC_OC_PEROXISOME		56	-0.339579	-0.820954	0.765448	1	1	2158	tags=18%, list=16%, signal=21%
GO_MF_OC_PROTEIN_KINASE_C_BINDING	GO_MF_OC_PROTEIN_KINASE_C_BINDING		16	-0.417005	-0.820593	0.728278	1	1	1590	tags=25%, list=12%, signal=28%
GO_BP_OC_METAL_ION_TRANSPORT	GO_BP_OC_METAL_ION_TRANSPORT		18	-0.398495	-0.818987	0.691706	1	1	1880	tags=22%, list=14%, signal=26%
GO_MF_OC_RHO_GUANYL-NUCLEOTIDE_EXCHANGE_FACTOR_ACTIVITY	GO_MF_OC_RHO_GUANYL-NUCLEOTIDE_EXCHANGE_FACTOR_ACTIVITY		55	-0.343756	-0.817419	0.774359	1	1	2456	tags=35%, list=18%, signal=42%
GO_BP_OC_POSITIVE_REGULATION_OF_CELL_DIVISION	GO_BP_OC_POSITIVE_REGULATION_OF_CELL_DIVISION		15	-0.416725	-0.815917	0.711009	1	1	1844	tags=33%, list=13%, signal=38%
GO_MF_OC_ASPARTIC-TYPE_ENDOPEPTIDASE_ACTIVITY	GO_MF_OC_ASPARTIC-TYPE_ENDOPEPTIDASE_ACTIVITY		18	-0.408543	-0.81568	0.71142	1	1	539	tags=17%, list=4%, signal=17%
GO_CC_OC_CONDENSED_NUCLEAR_CHROMOSOME	GO_CC_OC_CONDENSED_NUCLEAR_CHROMOSOME		17	-0.415282	-0.815595	0.742378	1	1	1223	tags=18%, list=9%, signal=19%
GO_BP_OC_REGULATION_OF_RHO_PROTEIN_SIGNAL_TRANSDUCTION	GO_BP_OC_REGULATION_OF_RHO_PROTEIN_SIGNAL_TRANSDUCTION		53	-0.341894	-0.81053	0.77381	1	1	2456	tags=34%, list=18%, signal=41%
GO_BP_OC_CELL_MATURATION	GO_BP_OC_CELL_MATURATION		31	-0.374038	-0.81019	0.759184	1	1	3447	tags=32%, list=25%, signal=43%
GO_BP_OC_ACTIVATION_OF_MAPKK_ACTIVITY	GO_BP_OC_ACTIVATION_OF_MAPKK_ACTIVITY		19	-0.40024	-0.81017	0.72546	1	1	2356	tags=26%, list=17%, signal=32%
GO_BP_OC_POSITIVE_REGULATION_OF_APOPTOTIC_PROCESS	GO_BP_OC_POSITIVE_REGULATION_OF_APOPTOTIC_PROCESS		116	-0.309148	-0.80919	0.832569	1	1	2356	tags=22%, list=17%, signal=26%
GO_BP_OC_BEHAVIOR	GO_BP_OC_BEHAVIOR		19	-0.398452	-0.80896	0.745736	1	1	257	tags=5%, list=2%, signal=5%
GO_CC_OC_AXON	GO_CC_OC_AXON		71	-0.329258	-0.807878	0.809406	1	1	2741	tags=21%, list=20%, signal=26%
GO_BP_OC_DEFENSE_RESPONSE_TO_VIRUS	GO_BP_OC_DEFENSE_RESPONSE_TO_VIRUS		34	-0.359498	-0.807708	0.773585	1	1	3132	tags=35%, list=23%, signal=46%
GO_BP_OC_NEGATIVE_REGULATION_OF_EPITHELIAL_CELL_PROLIFERATION	GO_BP_OC_NEGATIVE_REGULATION_OF_EPITHELIAL_CELL_PROLIFERATION		33	-0.358131	-0.805307	0.763636	1	1	310	tags=9%, list=2%, signal=9%
GO_BP_OC_POSITIVE_REGULATION_OF_CELL_GROWTH	GO_BP_OC_POSITIVE_REGULATION_OF_CELL_GROWTH		29	-0.37233	-0.804417	0.761173	1	1	2899	tags=31%, list=21%, signal=39%
GO_CC_OC_SCF_UBIQUITIN_LIGASE_COMPLEX	GO_CC_OC_SCF_UBIQUITIN_LIGASE_COMPLEX		18	-0.398802	-0.804117	0.736349	1	1	2064	tags=33%, list=15%, signal=39%
GO_BP_OC_CEREBRAL_CORTEX_DEVELOPMENT	GO_BP_OC_CEREBRAL_CORTEX_DEVELOPMENT		30	-0.367766	-0.801363	0.759184	1	1	2356	tags=27%, list=17%, signal=32%
GO_BP_OC_SOMATIC_STEM_CELL_MAINTENANCE	GO_BP_OC_SOMATIC_STEM_CELL_MAINTENANCE		26	-0.369329	-0.799117	0.765805	1	1	3107	tags=27%, list=23%, signal=35%
GO_MF_OC_PROTEIN_DISULFIDE_OXIDOREDUCTASE_ACTIVITY	GO_MF_OC_PROTEIN_DISULFIDE_OXIDOREDUCTASE_ACTIVITY		17	-0.402559	-0.799022	0.75303	1	1	3372	tags=41%, list=24%, signal=54%
GO_BP_OC_MESODERM_FORMATION	GO_BP_OC_MESODERM_FORMATION		21	-0.385767	-0.798305	0.739706	1	1	181	tags=5%, list=1%, signal=5%
GO_MF_OC_PHOSPHATIDYLINOSITOL_BINDING	GO_MF_OC_PHOSPHATIDYLINOSITOL_BINDING		59	-0.328637	-0.797819	0.793932	1	1	2963	tags=32%, list=22%, signal=41%
GO_CC_OC_KINETOCHORE	GO_CC_OC_KINETOCHORE		40	-0.343512	-0.795933	0.799469	1	1	2356	tags=25%, list=17%, signal=30%
GO_BP_OC_B_CELL_DIFFERENTIATION	GO_BP_OC_B_CELL_DIFFERENTIATION		24	-0.376752	-0.793605	0.769565	1	1	1525	tags=17%, list=11%, signal=19%
GO_BP_OC_GTP_CATABOLIC_PROCESS	GO_BP_OC_GTP_CATABOLIC_PROCESS		152	-0.297648	-0.793438	0.872054	1	1	2798	tags=20%, list=20%, signal=25%
GO_BP_OC_RHO_PROTEIN_SIGNAL_TRANSDUCTION	GO_BP_OC_RHO_PROTEIN_SIGNAL_TRANSDUCTION		15	-0.406758	-0.793045	0.751189	1	1	3386	tags=53%, list=25%, signal=71%
GO_BP_OC_THYMUS_DEVELOPMENT	GO_BP_OC_THYMUS_DEVELOPMENT		26	-0.369866	-0.792433	0.782672	1	1	2732	tags=31%, list=20%, signal=38%
GO_MF_OC_FLAVIN_ADENINE_DINUCLEOTIDE_BINDING	GO_MF_OC_FLAVIN_ADENINE_DINUCLEOTIDE_BINDING		46	-0.339518	-0.792124	0.791339	1	1	1120	tags=11%, list=8%, signal=12%
GO_MF_OC_CALMODULIN_BINDING	GO_MF_OC_CALMODULIN_BINDING		38	-0.350641	-0.790424	0.798928	1	1	1718	tags=26%, list=12%, signal=30%
GO_MF_OC_CATION_TRANSMEMBRANE_TRANSPORTER_ACTIVITY	GO_MF_OC_CATION_TRANSMEMBRANE_TRANSPORTER_ACTIVITY		18	-0.396062	-0.790285	0.76304	1	1	3486	tags=33%, list=25%, signal=45%
GO_BP_OC_MEMORY	GO_BP_OC_MEMORY		17	-0.398726	-0.789874	0.78681	1	1	1340	tags=12%, list=10%, signal=13%
GO_BP_OC_ERYTHROCYTE_DIFFERENTIATION	GO_BP_OC_ERYTHROCYTE_DIFFERENTIATION		26	-0.367102	-0.789694	0.778774	1	1	2214	tags=19%, list=16%, signal=23%
GO_BP_OC_GLUCOSE_METABOLIC_PROCESS	GO_BP_OC_GLUCOSE_METABOLIC_PROCESS		27	-0.366062	-0.786999	0.761216	1	1	1064	tags=15%, list=8%, signal=16%
GO_BP_OC_CELLULAR_RESPONSE_TO_ORGANIC_CYCLIC_COMPOUND	GO_BP_OC_CELLULAR_RESPONSE_TO_ORGANIC_CYCLIC_COMPOUND		20	-0.38465	-0.785975	0.77025	1	1	419	tags=10%, list=3%, signal=10%
GO_BP_OC_PANCREAS_DEVELOPMENT	GO_BP_OC_PANCREAS_DEVELOPMENT		18	-0.390332	-0.784533	0.776968	1	1	2670	tags=22%, list=19%, signal=28%
GO_CC_OC_PHOTORECEPTOR_CONNECTING_CILIUM	GO_CC_OC_PHOTORECEPTOR_CONNECTING_CILIUM		17	-0.397562	-0.783294	0.742284	1	1	2981	tags=41%, list=22%, signal=52%
GO_CC_OC_TRANS-GOLGI_NETWORK	GO_CC_OC_TRANS-GOLGI_NETWORK		51	-0.331041	-0.782305	0.829733	1	1	2692	tags=25%, list=20%, signal=32%
GO_MF_OC_COENZYME_BINDING	GO_MF_OC_COENZYME_BINDING		26	-0.359172	-0.781845	0.790896	1	1	2136	tags=35%, list=16%, signal=41%
GO_MF_OC_MICROTUBULE_BINDING	GO_MF_OC_MICROTUBULE_BINDING		51	-0.329577	-0.779614	0.829843	1	1	2520	tags=31%, list=18%, signal=38%
GO_BP_OC_MIDBRAIN_DEVELOPMENT	GO_BP_OC_MIDBRAIN_DEVELOPMENT		24	-0.367068	-0.779103	0.786861	1	1	3336	tags=33%, list=24%, signal=44%
GO_CC_OC_CHROMOSOME_CENTROMERIC_REGION	GO_CC_OC_CHROMOSOME_CENTROMERIC_REGION		23	-0.370988	-0.777049	0.780702	1	1	4486	tags=52%, list=33%, signal=77%
GO_BP_OC_NEGATIVE_REGULATION_OF_NEURON_DIFFERENTIATION	GO_BP_OC_NEGATIVE_REGULATION_OF_NEURON_DIFFERENTIATION		33	-0.344834	-0.767512	0.818308	1	1	1184	tags=9%, list=9%, signal=10%
GO_MF_OC_GTP_BINDING	GO_MF_OC_GTP_BINDING		215	-0.280415	-0.767433	0.924708	1	1	2316	tags=16%, list=17%, signal=19%
GO_MF_OC_GALACTOSYLTRANSFERASE_ACTIVITY	GO_MF_OC_GALACTOSYLTRANSFERASE_ACTIVITY		15	-0.399429	-0.76601	0.778947	1	1	1781	tags=27%, list=13%, signal=31%
GO_MF_OC_GTPASE_ACTIVITY	GO_MF_OC_GTPASE_ACTIVITY		152	-0.286141	-0.765117	0.91121	1	1	2798	tags=20%, list=20%, signal=24%
GO_BP_OC_PROXIMAL_DISTAL_PATTERN_FORMATION	GO_BP_OC_PROXIMAL_DISTAL_PATTERN_FORMATION		21	-0.370175	-0.764283	0.798825	1	1	2520	tags=24%, list=18%, signal=29%
GO_CC_OC_NUCLEAR_ENVELOPE	GO_CC_OC_NUCLEAR_ENVELOPE		51	-0.322208	-0.763922	0.83871	1	1	1828	tags=22%, list=13%, signal=25%
GO_BP_OC_NEGATIVE_REGULATION_OF_OSTEOBLAST_DIFFERENTIATION	GO_BP_OC_NEGATIVE_REGULATION_OF_OSTEOBLAST_DIFFERENTIATION		19	-0.378562	-0.76197	0.790274	1	1	132	tags=5%, list=1%, signal=5%
GO_MF_OC_HORMONE_ACTIVITY	GO_MF_OC_HORMONE_ACTIVITY		46	-0.324587	-0.760286	0.85259	1	1	1892	tags=7%, list=14%, signal=8%
GO_BP_OC_LIMB_MORPHOGENESIS	GO_BP_OC_LIMB_MORPHOGENESIS		17	-0.381839	-0.759219	0.816393	1	1	733	tags=12%, list=5%, signal=12%
GO_BP_OC_POSITIVE_REGULATION_OF_NEURON_DIFFERENTIATION	GO_BP_OC_POSITIVE_REGULATION_OF_NEURON_DIFFERENTIATION		39	-0.333133	-0.758819	0.844622	1	1	2208	tags=18%, list=16%, signal=21%
GO_MF_OC_LYASE_ACTIVITY	GO_MF_OC_LYASE_ACTIVITY		37	-0.340244	-0.757891	0.820479	1	1	2600	tags=24%, list=19%, signal=30%
GO_BP_OC_CYTOKINESIS	GO_BP_OC_CYTOKINESIS		29	-0.345322	-0.756048	0.825284	1	1	2222	tags=28%, list=16%, signal=33%
GO_BP_OC_PALATE_DEVELOPMENT	GO_BP_OC_PALATE_DEVELOPMENT		48	-0.322533	-0.75594	0.854545	1	1	2851	tags=29%, list=21%, signal=37%
GO_BP_OC_ACTIVATION_OF_MAPK_ACTIVITY	GO_BP_OC_ACTIVATION_OF_MAPK_ACTIVITY		45	-0.320231	-0.755009	0.846257	1	1	870	tags=13%, list=6%, signal=14%
GO_BP_OC_MICROTUBULE_CYTOSKELETON_ORGANIZATION	GO_BP_OC_MICROTUBULE_CYTOSKELETON_ORGANIZATION		32	-0.339195	-0.75377	0.836927	1	1	416	tags=6%, list=3%, signal=6%
GO_BP_OC_CELL_GROWTH	GO_BP_OC_CELL_GROWTH		20	-0.368191	-0.75298	0.827893	1	1	2557	tags=30%, list=19%, signal=37%
GO_BP_OC_CELL_PROLIFERATION	GO_BP_OC_CELL_PROLIFERATION		102	-0.290947	-0.752449	0.908005	1	1	2692	tags=22%, list=20%, signal=27%
GO_BP_OC_STEM_CELL_MAINTENANCE	GO_BP_OC_STEM_CELL_MAINTENANCE		18	-0.370244	-0.75096	0.799692	1	1	132	tags=6%, list=1%, signal=6%
GO_BP_OC_FIBROBLAST_GROWTH_FACTOR_RECEPTOR_SIGNALING_PATHWAY	GO_BP_OC_FIBROBLAST_GROWTH_FACTOR_RECEPTOR_SIGNALING_PATHWAY		18	-0.372079	-0.750716	0.816964	1	1	1723	tags=11%, list=13%, signal=13%
GO_BP_OC_RESPONSE_TO_HYPOXIA	GO_BP_OC_RESPONSE_TO_HYPOXIA		46	-0.317848	-0.749166	0.860792	1	1	2581	tags=33%, list=19%, signal=40%
GO_BP_OC_BRANCHING_MORPHOGENESIS_OF_A_TUBE	GO_BP_OC_BRANCHING_MORPHOGENESIS_OF_A_TUBE		24	-0.354985	-0.748596	0.816208	1	1	2723	tags=33%, list=20%, signal=41%
GO_CC_OC_FILOPODIUM	GO_CC_OC_FILOPODIUM		24	-0.355644	-0.748466	0.799139	1	1	1761	tags=21%, list=13%, signal=24%
GO_BP_OC_G1_S_TRANSITION_OF_MITOTIC_CELL_CYCLE	GO_BP_OC_G1_S_TRANSITION_OF_MITOTIC_CELL_CYCLE		32	-0.339125	-0.747184	0.838577	1	1	1340	tags=13%, list=10%, signal=14%
GO_BP_OC_CELLULAR_RESPONSE_TO_OXIDATIVE_STRESS	GO_BP_OC_CELLULAR_RESPONSE_TO_OXIDATIVE_STRESS		15	-0.38648	-0.745744	0.764228	1	1	1438	tags=27%, list=10%, signal=30%
GO_BP_OC_LIVER_DEVELOPMENT	GO_BP_OC_LIVER_DEVELOPMENT		36	-0.328374	-0.743582	0.86443	1	1	1886	tags=22%, list=14%, signal=26%
GO_MF_OC_OXIDOREDUCTASE_ACTIVITY_ACTING_ON_THE_ALDEHYDE_OR_OXO_GROUP_OF_DONORS_NAD_OR_NADP_AS_ACCEPTOR	GO_MF_OC_OXIDOREDUCTASE_ACTIVITY_ACTING_ON_THE_ALDEHYDE_OR_OXO_GROUP_OF_DONORS_NAD_OR_NADP_AS_ACCEPTOR		19	-0.369396	-0.743334	0.825038	1	1	2227	tags=26%, list=16%, signal=31%
GO_BP_OC_WNT_RECEPTOR_SIGNALING_PATHWAY	GO_BP_OC_WNT_RECEPTOR_SIGNALING_PATHWAY		56	-0.307228	-0.742561	0.890863	1	1	2489	tags=32%, list=18%, signal=39%
GO_CC_OC_PEROXISOMAL_MEMBRANE	GO_CC_OC_PEROXISOMAL_MEMBRANE		24	-0.347474	-0.741174	0.837037	1	1	54	tags=4%, list=0%, signal=4%
GO_BP_OC_IN_UTERO_EMBRYONIC_DEVELOPMENT	GO_BP_OC_IN_UTERO_EMBRYONIC_DEVELOPMENT		148	-0.275574	-0.740666	0.946961	1	1	2557	tags=20%, list=19%, signal=25%
GO_MF_OC_IRON-SULFUR_CLUSTER_BINDING	GO_MF_OC_IRON-SULFUR_CLUSTER_BINDING		23	-0.356732	-0.740349	0.822653	1	1	688	tags=9%, list=5%, signal=9%
GO_BP_OC_CELLULAR_METABOLIC_PROCESS	GO_BP_OC_CELLULAR_METABOLIC_PROCESS		24	-0.347005	-0.739475	0.815476	1	1	1630	tags=25%, list=12%, signal=28%
GO_CC_OC_CHROMOSOME_TELOMERIC_REGION	GO_CC_OC_CHROMOSOME_TELOMERIC_REGION		16	-0.380351	-0.738855	0.811527	1	1	862	tags=13%, list=6%, signal=13%
GO_MF_OC_SEQUENCE-SPECIFIC_DNA_BINDING_RNA_POLYMERASE_II_TRANSCRIPTION_FACTOR_ACTIVITY	GO_MF_OC_SEQUENCE-SPECIFIC_DNA_BINDING_RNA_POLYMERASE_II_TRANSCRIPTION_FACTOR_ACTIVITY		25	-0.344126	-0.738578	0.853067	1	1	3107	tags=28%, list=23%, signal=36%
GO_MF_OC_SEQUENCE-SPECIFIC_DNA_BINDING	GO_MF_OC_SEQUENCE-SPECIFIC_DNA_BINDING		391	-0.263408	-0.736372	0.982741	1	1	2505	tags=15%, list=18%, signal=18%
GO_CC_OC_AGGRESOME	GO_CC_OC_AGGRESOME		15	-0.377346	-0.73553	0.811094	1	1	1891	tags=20%, list=14%, signal=23%
GO_MF_OC_PHOSPHATASE_ACTIVITY	GO_MF_OC_PHOSPHATASE_ACTIVITY		86	-0.286945	-0.735524	0.90534	1	1	1909	tags=19%, list=14%, signal=21%
GO_BP_OC_CELL_DEVELOPMENT	GO_BP_OC_CELL_DEVELOPMENT		18	-0.36374	-0.733119	0.836041	1	1	3623	tags=33%, list=26%, signal=45%
GO_MF_OC_GLYCOSAMINOGLYCAN_BINDING	GO_MF_OC_GLYCOSAMINOGLYCAN_BINDING		16	-0.37485	-0.73242	0.816233	1	1	1267	tags=25%, list=9%, signal=28%
GO_BP_OC_RESPONSE_TO_CYTOKINE_STIMULUS	GO_BP_OC_RESPONSE_TO_CYTOKINE_STIMULUS		22	-0.347108	-0.731364	0.834543	1	1	2301	tags=23%, list=17%, signal=27%
GO_BP_OC_REGULATION_OF_CELL_CYCLE	GO_BP_OC_REGULATION_OF_CELL_CYCLE		52	-0.307234	-0.730491	0.892308	1	1	1765	tags=13%, list=13%, signal=15%
GO_BP_OC_DOUBLE-STRAND_BREAK_REPAIR_VIA_HOMOLOGOUS_RECOMBINATION	GO_BP_OC_DOUBLE-STRAND_BREAK_REPAIR_VIA_HOMOLOGOUS_RECOMBINATION		19	-0.364477	-0.729345	0.838855	1	1	3794	tags=42%, list=28%, signal=58%
GO_BP_OC_VISUAL_LEARNING	GO_BP_OC_VISUAL_LEARNING		18	-0.368217	-0.728712	0.843465	1	1	4195	tags=39%, list=30%, signal=56%
GO_BP_OC_POSITIVE_REGULATION_OF_PROTEASOMAL_UBIQUITIN-DEPENDENT_PROTEIN_CATABOLIC_PROCESS	GO_BP_OC_POSITIVE_REGULATION_OF_PROTEASOMAL_UBIQUITIN-DEPENDENT_PROTEIN_CATABOLIC_PROCESS		18	-0.362579	-0.728303	0.847692	1	1	3566	tags=50%, list=26%, signal=67%
GO_MF_OC_SH3_DOMAIN_BINDING	GO_MF_OC_SH3_DOMAIN_BINDING		40	-0.311819	-0.727351	0.881633	1	1	1909	tags=23%, list=14%, signal=26%
GO_CC_OC_CYTOPLASMIC_VESICLE	GO_CC_OC_CYTOPLASMIC_VESICLE		57	-0.29653	-0.718898	0.89875	1	1	2061	tags=18%, list=15%, signal=21%
GO_BP_OC_TRANSCRIPTION_DNA-DEPENDENT	GO_BP_OC_TRANSCRIPTION_DNA-DEPENDENT		210	-0.261971	-0.718152	0.97037	1	1	2252	tags=13%, list=16%, signal=15%
GO_BP_OC_METHYLATION	GO_BP_OC_METHYLATION		47	-0.30758	-0.717375	0.892247	1	1	1297	tags=11%, list=9%, signal=12%
GO_BP_OC_POSITIVE_REGULATION_OF_PHOSPHATIDYLINOSITOL_3-KINASE_ACTIVITY	GO_BP_OC_POSITIVE_REGULATION_OF_PHOSPHATIDYLINOSITOL_3-KINASE_ACTIVITY		15	-0.368878	-0.717319	0.860938	1	1	1043	tags=27%, list=8%, signal=29%
GO_BP_OC_PATTERNING_OF_BLOOD_VESSELS	GO_BP_OC_PATTERNING_OF_BLOOD_VESSELS		26	-0.333532	-0.714032	0.875872	1	1	102	tags=4%, list=1%, signal=4%
GO_MF_OC_SINGLE-STRANDED_DNA_BINDING	GO_MF_OC_SINGLE-STRANDED_DNA_BINDING		28	-0.328736	-0.713275	0.870555	1	1	3809	tags=43%, list=28%, signal=59%
GO_CC_OC_MELANOSOME	GO_CC_OC_MELANOSOME		17	-0.355364	-0.712574	0.865782	1	1	1342	tags=12%, list=10%, signal=13%
GO_BP_OC_POSITIVE_REGULATION_OF_PROTEIN_BINDING	GO_BP_OC_POSITIVE_REGULATION_OF_PROTEIN_BINDING		22	-0.342334	-0.712008	0.857143	1	1	2497	tags=27%, list=18%, signal=33%
GO_BP_OC_PLATELET_ACTIVATION	GO_BP_OC_PLATELET_ACTIVATION		21	-0.344824	-0.711811	0.863372	1	1	1449	tags=10%, list=11%, signal=11%
GO_BP_OC_COCHLEA_MORPHOGENESIS	GO_BP_OC_COCHLEA_MORPHOGENESIS		19	-0.349262	-0.711034	0.855869	1	1	1426	tags=16%, list=10%, signal=18%
GO_CC_OC_DENDRITE	GO_CC_OC_DENDRITE		61	-0.294216	-0.710534	0.913924	1	1	2641	tags=23%, list=19%, signal=28%
GO_MF_OC_GTPASE_ACTIVATOR_ACTIVITY	GO_MF_OC_GTPASE_ACTIVATOR_ACTIVITY		55	-0.299046	-0.709119	0.907125	1	1	2445	tags=29%, list=18%, signal=35%
GO_BP_OC_ADULT_LOCOMOTORY_BEHAVIOR	GO_BP_OC_ADULT_LOCOMOTORY_BEHAVIOR		29	-0.324442	-0.708601	0.88951	1	1	1703	tags=17%, list=12%, signal=20%
GO_MF_OC_ATP-DEPENDENT_DNA_HELICASE_ACTIVITY	GO_MF_OC_ATP-DEPENDENT_DNA_HELICASE_ACTIVITY		16	-0.361598	-0.707902	0.866154	1	1	2106	tags=25%, list=15%, signal=29%
GO_BP_OC_RESPONSE_TO_UV	GO_BP_OC_RESPONSE_TO_UV		25	-0.33313	-0.707828	0.879104	1	1	1237	tags=12%, list=9%, signal=13%
GO_BP_OC_MESODERM_DEVELOPMENT	GO_BP_OC_MESODERM_DEVELOPMENT		15	-0.365073	-0.707032	0.83792	1	1	717	tags=13%, list=5%, signal=14%
GO_MF_OC_DAMAGED_DNA_BINDING	GO_MF_OC_DAMAGED_DNA_BINDING		21	-0.33501	-0.705469	0.861702	1	1	3766	tags=38%, list=27%, signal=52%
GO_MF_OC_G-PROTEIN_COUPLED_PURINERGIC_NUCLEOTIDE_RECEPTOR_ACTIVITY	GO_MF_OC_G-PROTEIN_COUPLED_PURINERGIC_NUCLEOTIDE_RECEPTOR_ACTIVITY		22	-0.335532	-0.702653	0.876081	1	1	3599	tags=36%, list=26%, signal=49%
GO_BP_OC_G-PROTEIN_COUPLED_PURINERGIC_NUCLEOTIDE_RECEPTOR_SIGNALING_PATHWAY	GO_BP_OC_G-PROTEIN_COUPLED_PURINERGIC_NUCLEOTIDE_RECEPTOR_SIGNALING_PATHWAY		22	-0.335532	-0.702149	0.853026	1	1	3599	tags=36%, list=26%, signal=49%
GO_MF_OC_ENZYME_BINDING	GO_MF_OC_ENZYME_BINDING		124	-0.265771	-0.70206	0.967452	1	1	2447	tags=20%, list=18%, signal=24%
GO_BP_OC_RNA_SPLICING	GO_BP_OC_RNA_SPLICING		15	-0.360611	-0.700355	0.857771	1	1	375	tags=7%, list=3%, signal=7%
GO_CC_OC_CLATHRIN-COATED_VESICLE	GO_CC_OC_CLATHRIN-COATED_VESICLE		17	-0.356737	-0.69853	0.866564	1	1	233	tags=6%, list=2%, signal=6%
GO_BP_OC_PROTEIN_KINASE_B_SIGNALING_CASCADE	GO_BP_OC_PROTEIN_KINASE_B_SIGNALING_CASCADE		18	-0.348181	-0.697505	0.878924	1	1	1619	tags=22%, list=12%, signal=25%
GO_CC_OC_CHROMOSOME	GO_CC_OC_CHROMOSOME		48	-0.297182	-0.695709	0.938961	1	1	1305	tags=13%, list=9%, signal=14%
GO_MF_OC_PROTEIN_N-TERMINUS_BINDING	GO_MF_OC_PROTEIN_N-TERMINUS_BINDING		46	-0.297566	-0.69479	0.925974	1	1	2653	tags=20%, list=19%, signal=24%
GO_CC_OC_ACTIN_FILAMENT	GO_CC_OC_ACTIN_FILAMENT		16	-0.356882	-0.69467	0.863708	1	1	1127	tags=13%, list=8%, signal=14%
GO_BP_OC_NEGATIVE_REGULATION_OF_BMP_SIGNALING_PATHWAY	GO_BP_OC_NEGATIVE_REGULATION_OF_BMP_SIGNALING_PATHWAY		19	-0.34598	-0.693441	0.879389	1	1	2428	tags=21%, list=18%, signal=26%
GO_BP_OC_BIOSYNTHETIC_PROCESS	GO_BP_OC_BIOSYNTHETIC_PROCESS		42	-0.304761	-0.692497	0.910188	1	1	2982	tags=29%, list=22%, signal=36%
GO_BP_OC_NEURON_DIFFERENTIATION	GO_BP_OC_NEURON_DIFFERENTIATION		52	-0.290121	-0.691486	0.93125	1	1	1272	tags=8%, list=9%, signal=8%
GO_MF_OC_METHYLTRANSFERASE_ACTIVITY	GO_MF_OC_METHYLTRANSFERASE_ACTIVITY		55	-0.284346	-0.690675	0.944304	1	1	1297	tags=9%, list=9%, signal=10%
GO_BP_OC_CELL_DEATH	GO_BP_OC_CELL_DEATH		16	-0.344183	-0.68712	0.883257	1	1	867	tags=19%, list=6%, signal=20%
GO_BP_OC_CHOLESTEROL_TRANSPORT	GO_BP_OC_CHOLESTEROL_TRANSPORT		16	-0.350075	-0.685721	0.878613	1	1	1026	tags=13%, list=7%, signal=13%
GO_BP_OC_VASCULOGENESIS	GO_BP_OC_VASCULOGENESIS		43	-0.297275	-0.685174	0.938158	1	1	1400	tags=16%, list=10%, signal=18%
GO_BP_OC_DORSAL_VENTRAL_PATTERN_FORMATION	GO_BP_OC_DORSAL_VENTRAL_PATTERN_FORMATION		36	-0.300123	-0.678284	0.930423	1	1	2520	tags=17%, list=18%, signal=20%
GO_BP_OC_ANTI-APOPTOSIS	GO_BP_OC_ANTI-APOPTOSIS		74	-0.272553	-0.672994	0.962333	1	1	1744	tags=12%, list=13%, signal=14%
GO_BP_OC_NEURAL_TUBE_DEVELOPMENT	GO_BP_OC_NEURAL_TUBE_DEVELOPMENT		23	-0.319768	-0.66817	0.904348	1	1	2890	tags=26%, list=21%, signal=33%
GO_MF_OC_STEROID_HORMONE_RECEPTOR_ACTIVITY	GO_MF_OC_STEROID_HORMONE_RECEPTOR_ACTIVITY		36	-0.295531	-0.667973	0.94385	1	1	2447	tags=17%, list=18%, signal=20%
GO_CC_OC_SPINDLE_POLE	GO_CC_OC_SPINDLE_POLE		45	-0.287614	-0.667219	0.933775	1	1	1954	tags=16%, list=14%, signal=18%
GO_CC_OC_EARLY_ENDOSOME	GO_CC_OC_EARLY_ENDOSOME		54	-0.278853	-0.665795	0.959027	1	1	2313	tags=17%, list=17%, signal=20%
GO_CC_OC_SPLICEOSOMAL_COMPLEX	GO_CC_OC_SPLICEOSOMAL_COMPLEX		28	-0.301954	-0.661761	0.927966	1	1	945	tags=7%, list=7%, signal=8%
GO_CC_OC_GROWTH_CONE	GO_CC_OC_GROWTH_CONE		23	-0.31638	-0.660324	0.924779	1	1	2496	tags=26%, list=18%, signal=32%
GO_BP_OC_STEROID_HORMONE_MEDIATED_SIGNALING_PATHWAY	GO_BP_OC_STEROID_HORMONE_MEDIATED_SIGNALING_PATHWAY		37	-0.290191	-0.654277	0.946867	1	1	2447	tags=16%, list=18%, signal=20%
GO_BP_OC_MITOSIS	GO_BP_OC_MITOSIS		25	-0.30791	-0.653845	0.928177	1	1	3257	tags=24%, list=24%, signal=31%
GO_CC_OC_NUCLEAR_MATRIX	GO_CC_OC_NUCLEAR_MATRIX		32	-0.289064	-0.653388	0.938974	1	1	2400	tags=22%, list=17%, signal=26%
GO_BP_OC_POSITIVE_REGULATION_OF_PROTEIN_UBIQUITINATION	GO_BP_OC_POSITIVE_REGULATION_OF_PROTEIN_UBIQUITINATION		28	-0.297287	-0.64893	0.938571	1	1	2578	tags=29%, list=19%, signal=35%
GO_MF_OC_SNAP_RECEPTOR_ACTIVITY	GO_MF_OC_SNAP_RECEPTOR_ACTIVITY		15	-0.334875	-0.645362	0.923445	1	1	1811	tags=20%, list=13%, signal=23%
GO_MF_OC_IONOTROPIC_GLUTAMATE_RECEPTOR_ACTIVITY	GO_MF_OC_IONOTROPIC_GLUTAMATE_RECEPTOR_ACTIVITY		15	-0.332815	-0.64499	0.916928	1	1	2548	tags=20%, list=19%, signal=25%
GO_CC_OC_MICROTUBULE_ORGANIZING_CENTER	GO_CC_OC_MICROTUBULE_ORGANIZING_CENTER		18	-0.320459	-0.642987	0.91349	1	1	1959	tags=17%, list=14%, signal=19%
GO_MF_OC_EXTRACELLULAR-GLUTAMATE-GATED_ION_CHANNEL_ACTIVITY	GO_MF_OC_EXTRACELLULAR-GLUTAMATE-GATED_ION_CHANNEL_ACTIVITY		15	-0.332815	-0.640972	0.904538	1	1	2548	tags=20%, list=19%, signal=25%
GO_BP_OC_IONOTROPIC_GLUTAMATE_RECEPTOR_SIGNALING_PATHWAY	GO_BP_OC_IONOTROPIC_GLUTAMATE_RECEPTOR_SIGNALING_PATHWAY		16	-0.329906	-0.639346	0.927602	1	1	2548	tags=19%, list=19%, signal=23%
GO_MF_OC_NUCLEOTIDYLTRANSFERASE_ACTIVITY	GO_MF_OC_NUCLEOTIDYLTRANSFERASE_ACTIVITY		31	-0.285933	-0.636712	0.943135	1	1	1208	tags=10%, list=9%, signal=11%
GO_CC_OC_ENDOSOME_MEMBRANE	GO_CC_OC_ENDOSOME_MEMBRANE		25	-0.296538	-0.633614	0.9375	1	1	3290	tags=36%, list=24%, signal=47%
GO_MF_OC_NON-MEMBRANE_SPANNING_PROTEIN_TYROSINE_KINASE_ACTIVITY	GO_MF_OC_NON-MEMBRANE_SPANNING_PROTEIN_TYROSINE_KINASE_ACTIVITY		20	-0.306608	-0.633261	0.935681	1	1	1871	tags=15%, list=14%, signal=17%
GO_BP_OC_PHAGOCYTOSIS	GO_BP_OC_PHAGOCYTOSIS		19	-0.311263	-0.631241	0.935085	1	1	3840	tags=47%, list=28%, signal=66%
GO_BP_OC_TRANSCRIPTION_FROM_RNA_POLYMERASE_II_PROMOTER	GO_BP_OC_TRANSCRIPTION_FROM_RNA_POLYMERASE_II_PROMOTER		61	-0.257963	-0.626645	0.986335	1	1	3174	tags=23%, list=23%, signal=30%
GO_BP_OC_POSITIVE_REGULATION_OF_WNT_RECEPTOR_SIGNALING_PATHWAY	GO_BP_OC_POSITIVE_REGULATION_OF_WNT_RECEPTOR_SIGNALING_PATHWAY		15	-0.322614	-0.622903	0.925926	1	1	355	tags=7%, list=3%, signal=7%
GO_BP_OC_RESPIRATORY_GASEOUS_EXCHANGE	GO_BP_OC_RESPIRATORY_GASEOUS_EXCHANGE		15	-0.320919	-0.617764	0.946319	1	1	3117	tags=33%, list=23%, signal=43%
GO_BP_OC_POSITIVE_REGULATION_OF_MITOTIC_CELL_CYCLE	GO_BP_OC_POSITIVE_REGULATION_OF_MITOTIC_CELL_CYCLE		17	-0.308076	-0.616777	0.935897	1	1	1619	tags=18%, list=12%, signal=20%
GO_CC_OC_CONDENSED_CHROMOSOME	GO_CC_OC_CONDENSED_CHROMOSOME		21	-0.293928	-0.613303	0.959881	1	1	3510	tags=33%, list=25%, signal=45%
GO_BP_OC_RETINA_DEVELOPMENT_IN_CAMERA-TYPE_EYE	GO_BP_OC_RETINA_DEVELOPMENT_IN_CAMERA-TYPE_EYE		38	-0.267649	-0.604708	0.977242	1	1	2858	tags=18%, list=21%, signal=23%
GO_BP_OC_B_CELL_HOMEOSTASIS	GO_BP_OC_B_CELL_HOMEOSTASIS		15	-0.310662	-0.603001	0.944969	1	1	3283	tags=40%, list=24%, signal=52%
GO_MF_OC_HYDROLASE_ACTIVITY_ACTING_ON_CARBON-NITROGEN_BUT_NOT_PEPTIDE_BONDS	GO_MF_OC_HYDROLASE_ACTIVITY_ACTING_ON_CARBON-NITROGEN_BUT_NOT_PEPTIDE_BONDS		17	-0.304703	-0.602968	0.931548	1	1	389	tags=6%, list=3%, signal=6%
GO_BP_OC_CHEMOTAXIS	GO_BP_OC_CHEMOTAXIS		19	-0.299121	-0.602645	0.951735	1	1	1770	tags=16%, list=13%, signal=18%
GO_BP_OC_POSITIVE_REGULATION_OF_GTPASE_ACTIVITY	GO_BP_OC_POSITIVE_REGULATION_OF_GTPASE_ACTIVITY		56	-0.251454	-0.60178	0.993812	1	1	2445	tags=25%, list=18%, signal=30%
GO_BP_OC_RESPONSE_TO_STIMULUS	GO_BP_OC_RESPONSE_TO_STIMULUS		19	-0.296419	-0.598841	0.963855	1	1	2612	tags=11%, list=19%, signal=13%
GO_BP_OC_DEVELOPMENTAL_GROWTH	GO_BP_OC_DEVELOPMENTAL_GROWTH		24	-0.28315	-0.596677	0.968391	1	1	818	tags=8%, list=6%, signal=9%
GO_CC_OC_LATE_ENDOSOME	GO_CC_OC_LATE_ENDOSOME		43	-0.256765	-0.592495	0.988251	1	1	1760	tags=16%, list=13%, signal=19%
GO_BP_OC_PROTEOLYSIS_INVOLVED_IN_CELLULAR_PROTEIN_CATABOLIC_PROCESS	GO_BP_OC_PROTEOLYSIS_INVOLVED_IN_CELLULAR_PROTEIN_CATABOLIC_PROCESS		19	-0.283139	-0.575357	0.976471	1	1	2091	tags=16%, list=15%, signal=19%
GO_BP_OC_PROTEIN_UBIQUITINATION_INVOLVED_IN_UBIQUITIN-DEPENDENT_PROTEIN_CATABOLIC_PROCESS	GO_BP_OC_PROTEIN_UBIQUITINATION_INVOLVED_IN_UBIQUITIN-DEPENDENT_PROTEIN_CATABOLIC_PROCESS		18	-0.285905	-0.568449	0.957746	1	1	2098	tags=22%, list=15%, signal=26%
GO_CC_OC_CAJAL_BODY	GO_CC_OC_CAJAL_BODY		15	-0.287424	-0.559437	0.965135	1	1	4155	tags=40%, list=30%, signal=57%
GO_BP_OC_TRANSLATIONAL_INITIATION	GO_BP_OC_TRANSLATIONAL_INITIATION		29	-0.24946	-0.546152	0.985935	1	1	3601	tags=28%, list=26%, signal=37%
GO_MF_OC_HYDROLASE_ACTIVITY_ACTING_ON_ACID_ANHYDRIDES	GO_MF_OC_HYDROLASE_ACTIVITY_ACTING_ON_ACID_ANHYDRIDES		16	-0.267803	-0.522831	0.988836	1	1	2106	tags=13%, list=15%, signal=15%
GO_BP_OC_PROTEIN_OLIGOMERIZATION	GO_BP_OC_PROTEIN_OLIGOMERIZATION		21	-0.255393	-0.520563	0.986667	1	1	3264	tags=24%, list=24%, signal=31%
GO_BP_OC_PLATELET-DERIVED_GROWTH_FACTOR_RECEPTOR_SIGNALING_PATHWAY	GO_BP_OC_PLATELET-DERIVED_GROWTH_FACTOR_RECEPTOR_SIGNALING_PATHWAY		19	-0.255762	-0.515344	0.993958	1	1	2842	tags=32%, list=21%, signal=40%
GO_BP_OC_NOTCH_SIGNALING_PATHWAY	GO_BP_OC_NOTCH_SIGNALING_PATHWAY		28	-0.235942	-0.506911	0.992997	1	1	2432	tags=21%, list=18%, signal=26%
GO_MF_OC_THREONINE-TYPE_ENDOPEPTIDASE_ACTIVITY	GO_MF_OC_THREONINE-TYPE_ENDOPEPTIDASE_ACTIVITY		16	-0.252835	-0.500617	0.986301	1	1	3930	tags=38%, list=29%, signal=52%
GO_BP_OC_MRNA_PROCESSING	GO_BP_OC_MRNA_PROCESSING		29	-0.231545	-0.495914	0.994286	1	1	375	tags=3%, list=3%, signal=4%
GO_MF_OC_TRANSLATION_INITIATION_FACTOR_ACTIVITY	GO_MF_OC_TRANSLATION_INITIATION_FACTOR_ACTIVITY		25	-0.233807	-0.489066	0.998592	1	1	3391	tags=24%, list=25%, signal=32%
GO_BP_OC_NEGATIVE_REGULATION_OF_CELL_CYCLE	GO_BP_OC_NEGATIVE_REGULATION_OF_CELL_CYCLE		15	-0.248242	-0.48178	0.996904	1	1	4810	tags=67%, list=35%, signal=102%
GO_BP_OC_PHOSPHATIDYLINOSITOL-MEDIATED_SIGNALING	GO_BP_OC_PHOSPHATIDYLINOSITOL-MEDIATED_SIGNALING		20	-0.233157	-0.480827	0.997037	1	1	2691	tags=20%, list=20%, signal=25%
GO_BP_OC_HISTONE_H4_ACETYLATION	GO_BP_OC_HISTONE_H4_ACETYLATION		16	-0.236218	-0.458967	0.995334	1	1	10519	tags=100%, list=76%, signal=423%
GO_MF_OC_BETA-TUBULIN_BINDING	GO_MF_OC_BETA-TUBULIN_BINDING		16	-0.204839	-0.404388	0.99697	0.999804	1	4193	tags=44%, list=30%, signal=63%
